# Supplementary material for: Identification of a Family of Glycoside Derivatives Biologically Active against Acinetobacter baumannii and Other MDR Bacteria Using a QSPR Model
Source: MDPI journal article supplement (doi:10.3390/ph16020250), 2023-02-07
Supplement: s1 [file s1]

## Supplementary Information

# Identification of glycoside derivatives against *Acinetobacter baumannii* and other MDR bacteria through a QSPR model

Francisco José Palacios-Can <sup>1,2</sup>, Jesús Silva-Sánchez <sup>3</sup>, Ismael León-Rivera <sup>2</sup>, Hugo Tlahuext <sup>2</sup>, Nina Pastor <sup>1</sup> and Rodrigo Said Razo-Hernández <sup>1,\*</sup>

<sup>1</sup> Centro de Investigación en Dinámica Celular, Universidad Autónoma del Estado de Morelos, Av. Universidad 1001, Col. Chamilpa, Cuernavaca, Morelos, 62209 México

<sup>2</sup> Centro de Investigaciones Químicas, Universidad Autónoma del Estado de Morelos, Av. Universidad 1001, Col. Chamilpa, Cuernavaca, Morelos, 62209 México.

<sup>3</sup> Centro de Investigación sobre Enfermedades Infecciosas, Instituto Nacional de Salud Pública, Av. Universidad 655, Col. Sta. Ma. Ahuacatitlan, Cuernavaca, Morelos, 62100 México

\* Correspondence: rodrigo.razo@uaem.mx

### Table of contents

1. **Figure S1.** Scatterplots and Williams plots for each training-test experiment
2. **Figure S2.** Scatterplots for each of the molecular descriptors against experimental *p*MIC
3. **Figure S3.** Chemical structures from the ChEMBL database which incorporate the deoxy-sugar moiety found in compound 60
4. **Figure S4.** SwissADME predictions for compound 60 and derivatives
5. **Figure S5.** BOILED-Egg model for 60-derivatives and compounds (a-f) and 60 to 60h
6. **Table S1.** Complete list of descriptors from the Dragon package
7. **Table S2.** List of molecules used for the generation of the QSPR model
8. **Table S3.** Average values for each molecular descriptor
9. **Table S4.** Statistical parameters for the evaluation of the predictive power
10. **Table S5.** List of molecules used for the validation tests sets, their calculated molecular descriptors, and predicted *p*MIC values
11. **Table S6.** List of molecules from the BIOFACQUIM database, their calculated molecular descriptors, and predicted *p*MIC values.
12. **Table S7.** List of 60-derivatives, their calculated molecular descriptors, and predicted *p*MIC values.

Figure S1. Scatterplots and Williams plots for each training-test experiment.

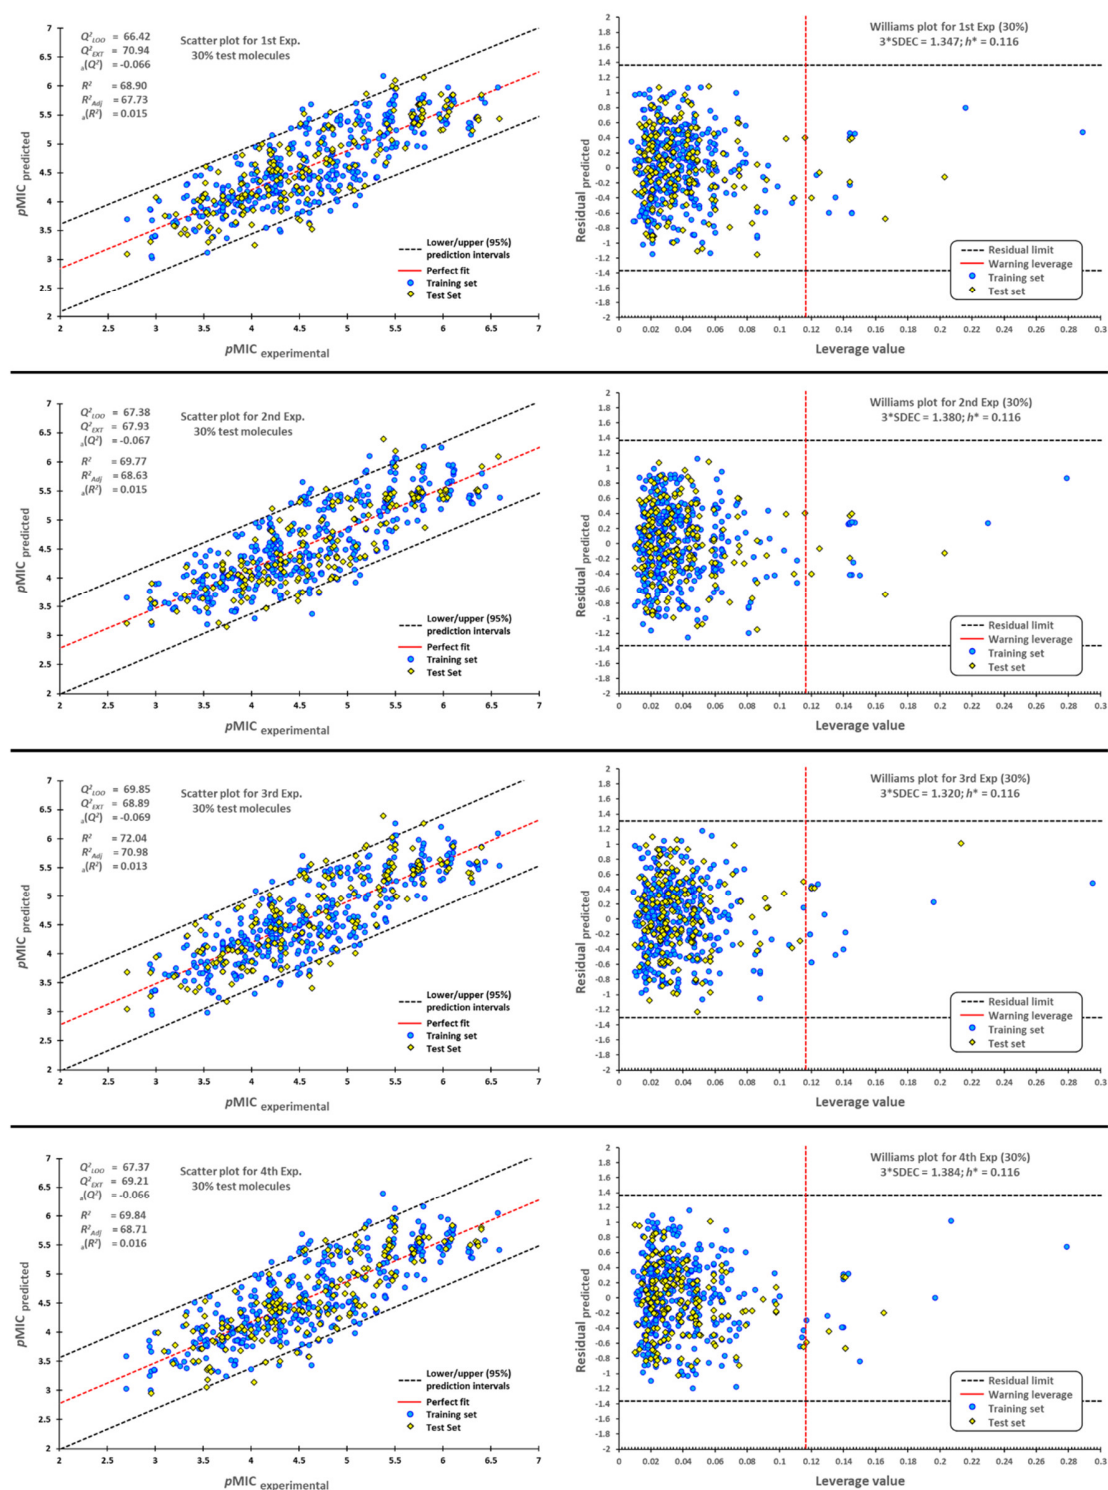

Figure S1. Scatterplots and Williams plots for each training-test experiment (cont.)

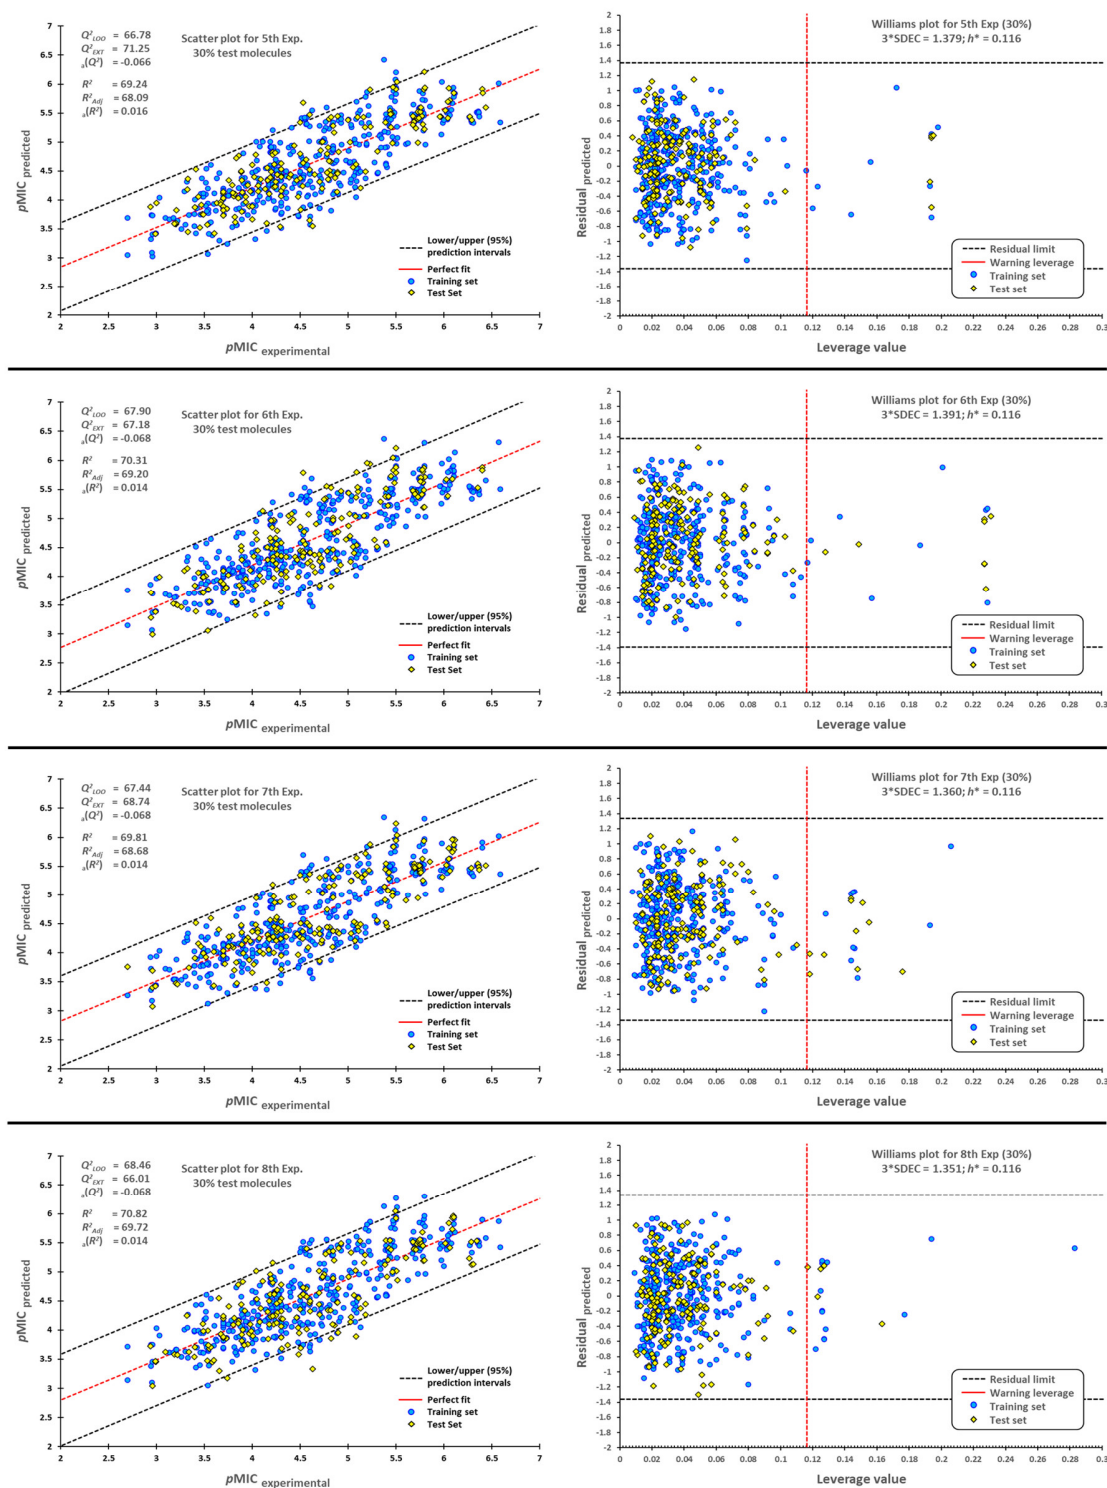

Figure S1. Scatterplots and Williams plots for each training-test experiment (cont.)

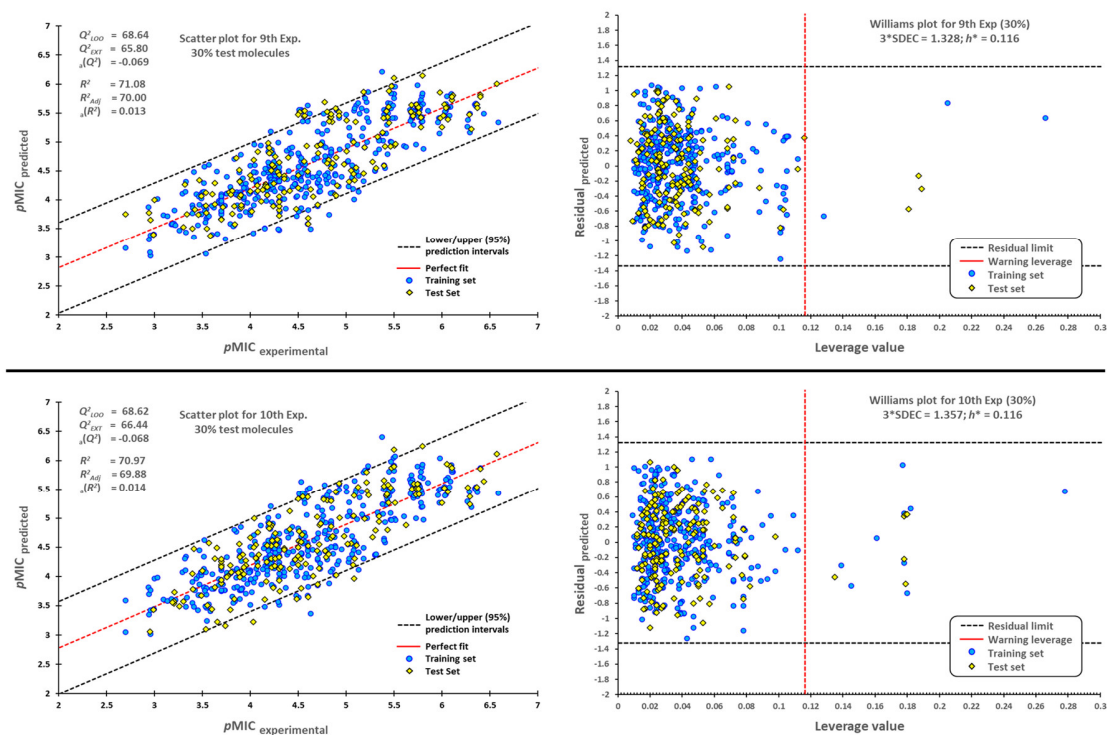



**Figure S2.** Scatterplots for each of the molecular descriptors against experimental *p*MIC

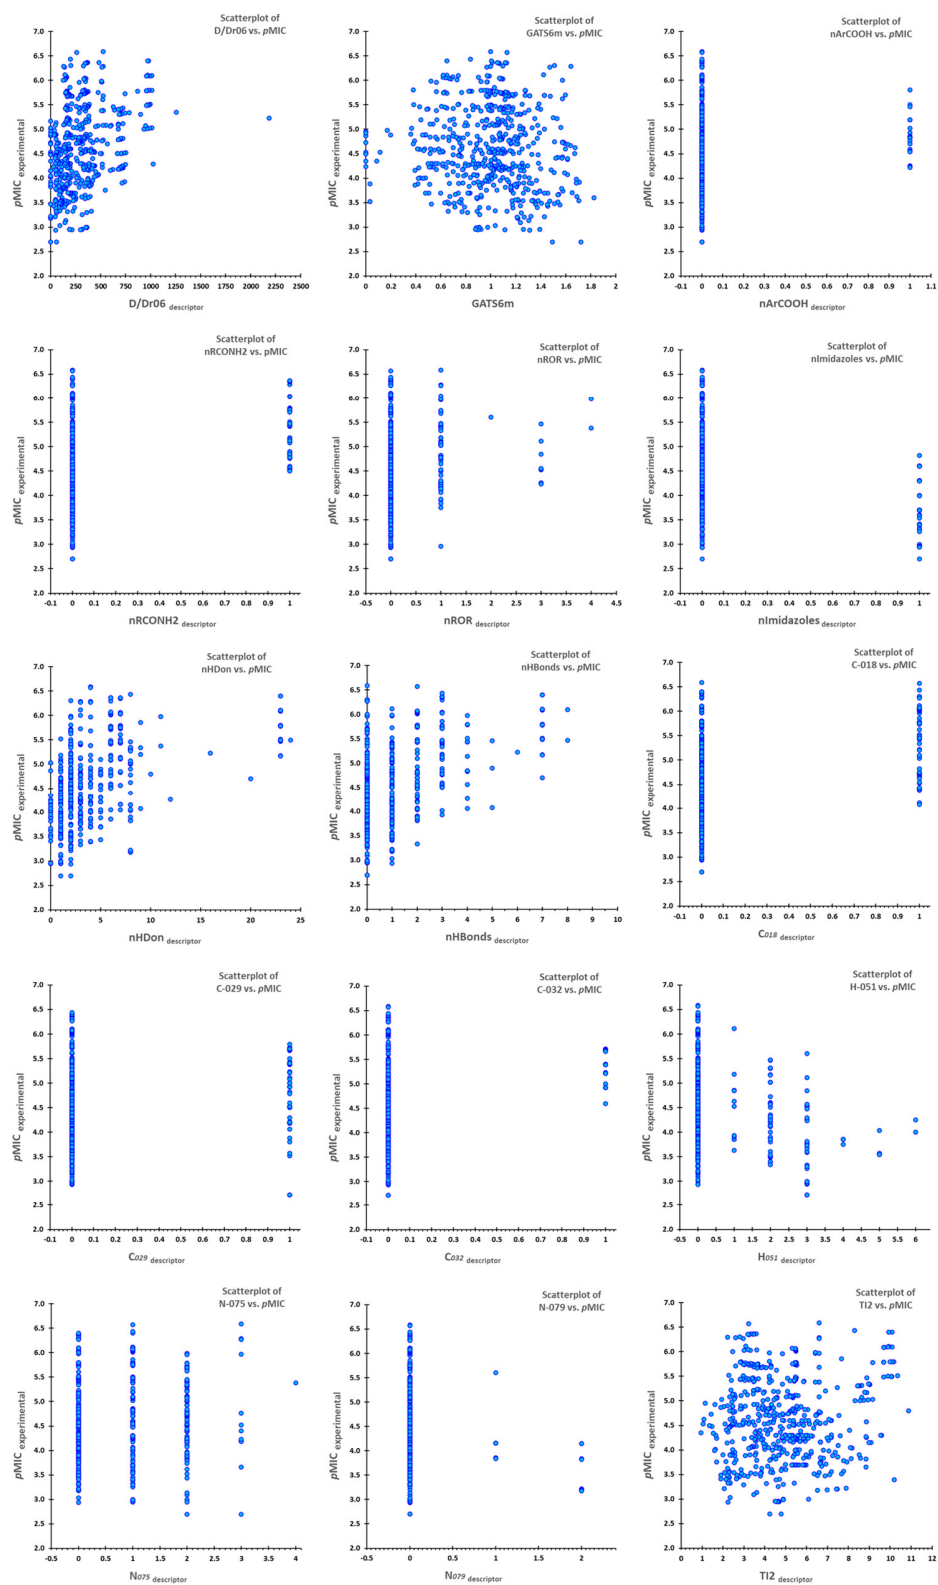

**Figure S3.** Chemical structures from the ChEMBL database which incorporate the deoxy-sugar moiety found in compound 60 (highlighted in yellow) and their predicted ADMET properties using SwissADME. References for (a) in [1]; for (b) in [2]; for (c) in [3]; for (d) in [4]; for (e) in [5-6]; and for (f) in [7].

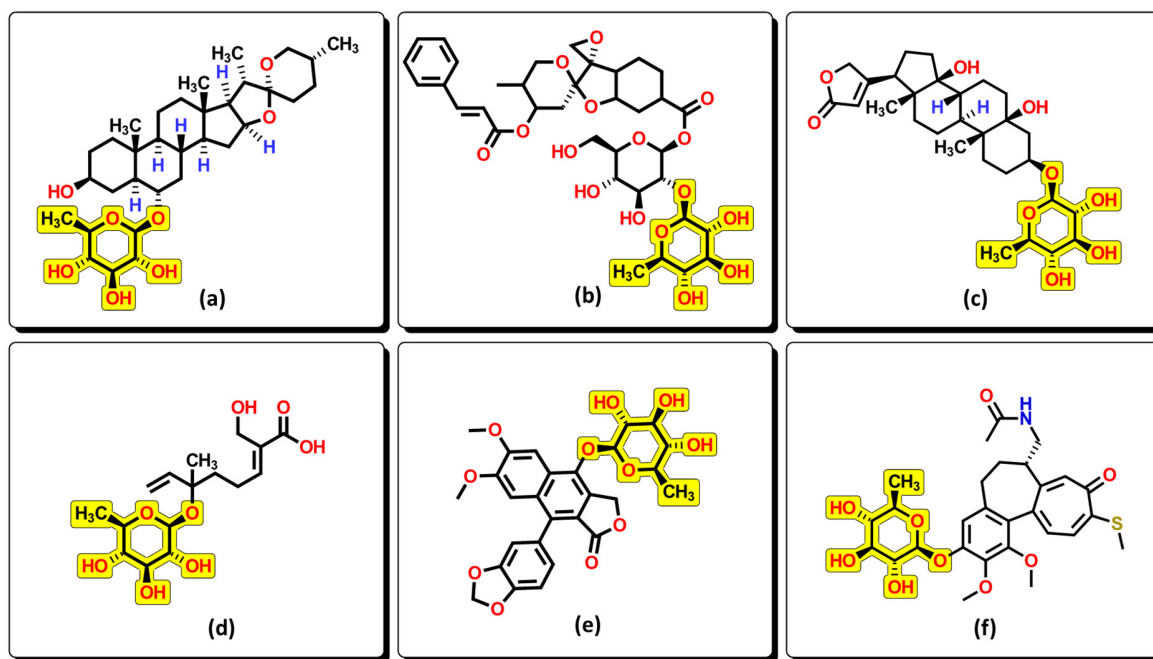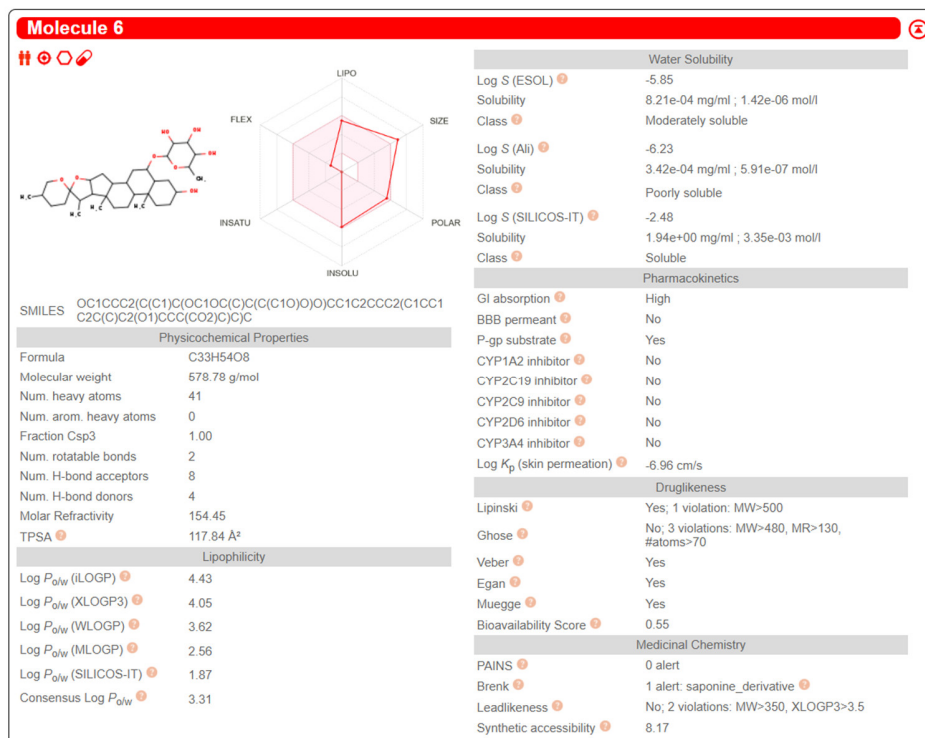

## Molecule 7

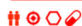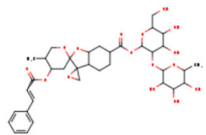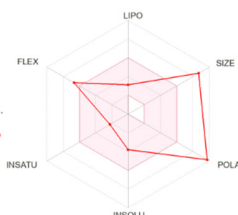

SMILES OCC1OC(OC(=O)C2CCCC3C(C2)OC2(C43CO4)OCC(C(C2)OC(=O)C=C(C2CCCC2)C)C(C(C1O)O)OC1OC(C)C(C(C1O)O)O

### Physicochemical Properties

|                        |              |
|------------------------|--------------|
| Formula                | C36H48O16    |
| Molecular weight       | 736.76 g/mol |
| Num. heavy atoms       | 52           |
| Num. arom. heavy atoms | 6            |
| Fraction Csp3          | 0.72         |
| Num. rotatable bonds   | 10           |
| Num. H-bond acceptors  | 16           |
| Num. H-bond donors     | 6            |
| Molar Refractivity     | 174.57       |
| TPSA                   | 232.66 Å²    |

### Lipophilicity

|                           |       |
|---------------------------|-------|
| Log $P_{ow}$ (ILOP)       | 3.37  |
| Log $P_{ow}$ (XLOGP3)     | -0.04 |
| Log $P_{ow}$ (WLOGP)      | -0.97 |
| Log $P_{ow}$ (MLOGP)      | -1.50 |
| Log $P_{ow}$ (SILICOS-IT) | -0.56 |
| Consensus Log $P_{ow}$    | 0.06  |

| Water Solubility            |                                                                              |
|-----------------------------|------------------------------------------------------------------------------|
| Log S (ESOL)                | -3.81                                                                        |
| Solubility                  | 1.15e-01 mg/ml ; 1.56e-04 mol/l                                              |
| Class                       | Soluble                                                                      |
| Log S (Ali)                 | -4.40                                                                        |
| Solubility                  | 2.96e-02 mg/ml ; 4.02e-05 mol/l                                              |
| Class                       | Moderately soluble                                                           |
| Log S (SILICOS-IT)          | -0.43                                                                        |
| Solubility                  | 2.72e+02 mg/ml ; 3.69e-01 mol/l                                              |
| Class                       | Soluble                                                                      |
| Pharmacokinetics            |                                                                              |
| GI absorption               | Low                                                                          |
| BBB permeant                | No                                                                           |
| P-gp substrate              | Yes                                                                          |
| CYP1A2 inhibitor            | No                                                                           |
| CYP2C19 inhibitor           | No                                                                           |
| CYP2C9 inhibitor            | No                                                                           |
| CYP2D6 inhibitor            | No                                                                           |
| CYP3A4 inhibitor            | No                                                                           |
| Log $K_p$ (skin permeation) | -10.82 cm/s                                                                  |
| Druglikeness                |                                                                              |
| Lipinski                    | No; 3 violations: MW>500, NorO>10, NHorOH>5                                  |
| Ghose                       | No; 4 violations: MW>480, WLOGP<-0.4, MR>130, #atoms>70                      |
| Veber                       | No; 1 violation: TPSA>140                                                    |
| Egan                        | No; 1 violation: TPSA>131.6                                                  |
| Muegge                      | No; 4 violations: MW>600, TPSA>150, H-acc>10, H-don>5                        |
| Bioavailability Score       | 0.17                                                                         |
| Medicinal Chemistry         |                                                                              |
| PAINS                       | 0 alert                                                                      |
| Brenk                       | 3 alerts: Three-membered_heterocycle, michael_acceptor_1, more_than_2_esters |
| Leadlikeness                | No; 2 violations: MW>350, Rotors>7                                           |
| Synthetic accessibility     | 8.24                                                                         |

## Molecule 8

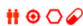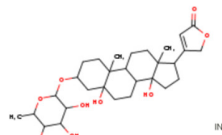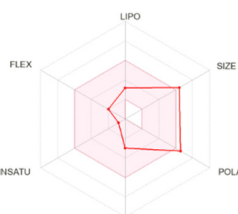

SMILES O=C1OCC(=C1)C1CCC2(C1(C)CCC1C2CCC2(C1(C)CCC(C2)OC1OC(C)C(C(C1O)O)O)O)O

### Physicochemical Properties

|                        |              |
|------------------------|--------------|
| Formula                | C29H44O9     |
| Molecular weight       | 536.65 g/mol |
| Num. heavy atoms       | 38           |
| Num. arom. heavy atoms | 0            |
| Fraction Csp3          | 0.90         |
| Num. rotatable bonds   | 3            |
| Num. H-bond acceptors  | 9            |
| Num. H-bond donors     | 5            |
| Molar Refractivity     | 137.18       |
| TPSA                   | 145.91 Å²    |

### Lipophilicity

|                           |      |
|---------------------------|------|
| Log $P_{ow}$ (ILOP)       | 3.40 |
| Log $P_{ow}$ (XLOGP3)     | 0.05 |
| Log $P_{ow}$ (WLOGP)      | 1.57 |
| Log $P_{ow}$ (MLOGP)      | 1.18 |
| Log $P_{ow}$ (SILICOS-IT) | 1.41 |
| Consensus Log $P_{ow}$    | 1.52 |

| Water Solubility            |                                             |
|-----------------------------|---------------------------------------------|
| Log S (ESOL)                | -3.00                                       |
| Solubility                  | 5.36e-01 mg/ml ; 9.98e-04 mol/l             |
| Class                       | Soluble                                     |
| Log S (Ali)                 | -2.67                                       |
| Solubility                  | 1.15e+00 mg/ml ; 2.15e-03 mol/l             |
| Class                       | Soluble                                     |
| Log S (SILICOS-IT)          | -1.90                                       |
| Solubility                  | 6.77e+00 mg/ml ; 1.26e-02 mol/l             |
| Class                       | Soluble                                     |
| Pharmacokinetics            |                                             |
| GI absorption               | Low                                         |
| BBB permeant                | No                                          |
| P-gp substrate              | Yes                                         |
| CYP1A2 inhibitor            | No                                          |
| CYP2C19 inhibitor           | No                                          |
| CYP2C9 inhibitor            | No                                          |
| CYP2D6 inhibitor            | No                                          |
| CYP3A4 inhibitor            | No                                          |
| Log $K_p$ (skin permeation) | -9.54 cm/s                                  |
| Druglikeness                |                                             |
| Lipinski                    | Yes; 1 violation: MW>500                    |
| Ghose                       | No; 3 violations: MW>480, MR>130, #atoms>70 |
| Veber                       | No; 1 violation: TPSA>140                   |
| Egan                        | No; 1 violation: TPSA>131.6                 |
| Muegge                      | Yes                                         |
| Bioavailability Score       | 0.55                                        |
| Medicinal Chemistry         |                                             |
| PAINS                       | 0 alert                                     |
| Brenk                       | 1 alert: saponine_derivative                |
| Leadlikeness                | No; 1 violation: MW>350                     |
| Synthetic accessibility     | 6.92                                        |

## Molecule 9

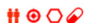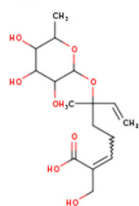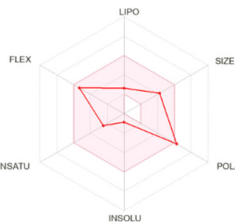

SMILES OC/C(=C)CCC(OC1OC(C)C(C(C1O)O)O)(C=C)C/C(=O)O

### Physicochemical Properties

|                        |              |
|------------------------|--------------|
| Formula                | C16H26O8     |
| Molecular weight       | 346.37 g/mol |
| Num. heavy atoms       | 24           |
| Num. arom. heavy atoms | 0            |
| Fraction Csp3          | 0.69         |
| Num. rotatable bonds   | 8            |
| Num. H-bond acceptors  | 8            |
| Num. H-bond donors     | 5            |
| Molar Refractivity     | 84.59        |
| TPSA                   | 136.68 Å²    |

### Lipophilicity

|                           |       |
|---------------------------|-------|
| Log $P_{ow}$ (iLOGP)      | 1.38  |
| Log $P_{ow}$ (XLOGP3)     | -0.92 |
| Log $P_{ow}$ (WLOGP)      | -0.44 |
| Log $P_{ow}$ (MLOGP)      | -0.96 |
| Log $P_{ow}$ (SILICOS-IT) | -0.12 |
| Consensus Log $P_{ow}$    | -0.21 |

| Water Solubility   |                                 |
|--------------------|---------------------------------|
| Log S (ESOL)       | -0.88                           |
| Solubility         | 4.57e+01 mg/ml ; 1.32e-01 mol/l |
| Class              | Very soluble                    |
| Log S (Ali)        | -1.47                           |
| Solubility         | 1.18e+01 mg/ml ; 3.41e-02 mol/l |
| Class              | Very soluble                    |
| Log S (SILICOS-IT) | 0.79                            |
| Solubility         | 2.15e+03 mg/ml ; 6.19e+00 mol/l |
| Class              | Soluble                         |

### Pharmacokinetics

|                             |            |
|-----------------------------|------------|
| GI absorption               | High       |
| BBB permeant                | No         |
| P-gp substrate              | Yes        |
| CYP1A2 inhibitor            | No         |
| CYP2C19 inhibitor           | No         |
| CYP2C9 inhibitor            | No         |
| CYP2D6 inhibitor            | No         |
| CYP3A4 inhibitor            | No         |
| Log $K_p$ (skin permeation) | -9.07 cm/s |

### Druglikeness

|                       |                             |
|-----------------------|-----------------------------|
| Lipinski              | Yes; 0 violation            |
| Ghose                 | No; 1 violation: WLOGP<-0.4 |
| Veber                 | Yes                         |
| Egan                  | No; 1 violation: TPSA>131.6 |
| Muegge                | Yes                         |
| Bioavailability Score | 0.56                        |

### Medicinal Chemistry

|                         |                                               |
|-------------------------|-----------------------------------------------|
| PAINS                   | 0 alert                                       |
| Brenk                   | 2 alerts: isolated_alkene, michael_acceptor_1 |
| Leadlikeness            | No; 1 violation: Rotors>7                     |
| Synthetic accessibility | 5.17                                          |

## Molecule 10

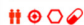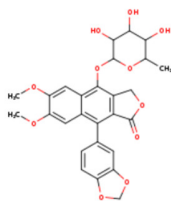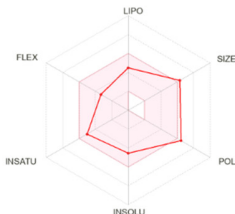

SMILES COc1cc2c(OC3OC(C)C(C(C3O)O)O)c3COC(=O)c3cc(c2cc1OC)c1cc2c(c1)OCO2

### Physicochemical Properties

|                        |              |
|------------------------|--------------|
| Formula                | C27H26O11    |
| Molecular weight       | 526.49 g/mol |
| Num. heavy atoms       | 38           |
| Num. arom. heavy atoms | 16           |
| Fraction Csp3          | 0.37         |
| Num. rotatable bonds   | 5            |
| Num. H-bond acceptors  | 11           |
| Num. H-bond donors     | 3            |
| Molar Refractivity     | 130.74       |
| TPSA                   | 142.37 Å²    |

### Lipophilicity

|                           |      |
|---------------------------|------|
| Log $P_{ow}$ (iLOGP)      | 2.99 |
| Log $P_{ow}$ (XLOGP3)     | 2.32 |
| Log $P_{ow}$ (WLOGP)      | 1.98 |
| Log $P_{ow}$ (MLOGP)      | 0.64 |
| Log $P_{ow}$ (SILICOS-IT) | 2.62 |
| Consensus Log $P_{ow}$    | 2.11 |

| Water Solubility   |                                 |
|--------------------|---------------------------------|
| Log S (ESOL)       | -4.55                           |
| Solubility         | 1.49e-02 mg/ml ; 2.84e-05 mol/l |
| Class              | Moderately soluble              |
| Log S (Ali)        | -4.95                           |
| Solubility         | 5.93e-03 mg/ml ; 1.13e-05 mol/l |
| Class              | Moderately soluble              |
| Log S (SILICOS-IT) | -4.95                           |
| Solubility         | 5.92e-03 mg/ml ; 1.12e-05 mol/l |
| Class              | Moderately soluble              |

### Pharmacokinetics

|                             |            |
|-----------------------------|------------|
| GI absorption               | Low        |
| BBB permeant                | No         |
| P-gp substrate              | No         |
| CYP1A2 inhibitor            | No         |
| CYP2C19 inhibitor           | No         |
| CYP2C9 inhibitor            | Yes        |
| CYP2D6 inhibitor            | Yes        |
| CYP3A4 inhibitor            | Yes        |
| Log $K_p$ (skin permeation) | -7.86 cm/s |

### Druglikeness

|                       |                                   |
|-----------------------|-----------------------------------|
| Lipinski              | No; 2 violations: MW>500, NorO>10 |
| Ghose                 | No; 2 violations: MW>480, MR>130  |
| Veber                 | No; 1 violation: TPSA>140         |
| Egan                  | No; 1 violation: TPSA>131.6       |
| Muegge                | No; 1 violation: H-acc>10         |
| Bioavailability Score | 0.17                              |

### Medicinal Chemistry

|                         |                         |
|-------------------------|-------------------------|
| PAINS                   | 0 alert                 |
| Brenk                   | 0 alert                 |
| Leadlikeness            | No; 1 violation: MW>350 |
| Synthetic accessibility | 5.49                    |

## Molecule 11

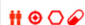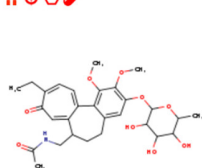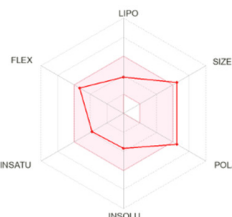

SMILES COc1c(OC)c(OC2OC(C)C(C(C2O)O)O)cc2c1c1ccc(c(=O)cc1C(C(C2)CNC(=O)C)CC

### Physicochemical Properties

Formula C<sub>29</sub>H<sub>37</sub>NO<sub>9</sub>  
Molecular weight 543.61 g/mol  
Num. heavy atoms 39  
Num. arom. heavy atoms 13  
Fraction Csp<sup>3</sup> 0.52  
Num. rotatable bonds 8  
Num. H-bond acceptors 9  
Num. H-bond donors 4  
Molar Refractivity 143.94  
TPSA 143.78 Å<sup>2</sup>

### Lipophilicity

Log *P*<sub>o/w</sub> (iLOGP) 3.42  
Log *P*<sub>o/w</sub> (XLOGP3) 1.17  
Log *P*<sub>o/w</sub> (WLOGP) 1.67  
Log *P*<sub>o/w</sub> (MLOGP) 0.25  
Log *P*<sub>o/w</sub> (SILICOS-IT) 3.18  
Consensus Log *P*<sub>o/w</sub> 1.94

| Water Solubility                            |                                             |
|---------------------------------------------|---------------------------------------------|
| Log S (ESOL)                                | -3.67                                       |
| Solubility                                  | 1.17e-01 mg/ml ; 2.16e-04 mol/l             |
| Class                                       | Soluble                                     |
| Log S (Ali)                                 | -3.78                                       |
| Solubility                                  | 8.92e-02 mg/ml ; 1.64e-04 mol/l             |
| Class                                       | Soluble                                     |
| Log S (SILICOS-IT)                          | -5.83                                       |
| Solubility                                  | 8.10e-04 mg/ml ; 1.49e-06 mol/l             |
| Class                                       | Moderately soluble                          |
| Pharmacokinetics                            |                                             |
| GI absorption                               | Low                                         |
| BBB permeant                                | No                                          |
| P-gp substrate                              | Yes                                         |
| CYP1A2 inhibitor                            | No                                          |
| CYP2C19 inhibitor                           | No                                          |
| CYP2C9 inhibitor                            | No                                          |
| CYP2D6 inhibitor                            | No                                          |
| CYP3A4 inhibitor                            | Yes                                         |
| Log <i>K</i> <sub>p</sub> (skin permeation) | -8.79 cm/s                                  |
| Druglikeness                                |                                             |
| Lipinski                                    | Yes; 1 violation: MW>500                    |
| Ghose                                       | No; 3 violations: MW>480, MR>130, #atoms>70 |
| Veber                                       | No; 1 violation: TPSA>140                   |
| Egan                                        | No; 1 violation: TPSA>131.6                 |
| Muegge                                      | Yes                                         |
| Bioavailability Score                       | 0.55                                        |
| Medicinal Chemistry                         |                                             |
| PAINS                                       | 0 alert                                     |
| Brenk                                       | 0 alert                                     |
| Leadlikeness                                | No; 2 violations: MW>350, Rotors>7          |
| Synthetic accessibility                     | 5.92                                        |

**Figure S4.** SwissADME predictions for compound 60 and derivatives

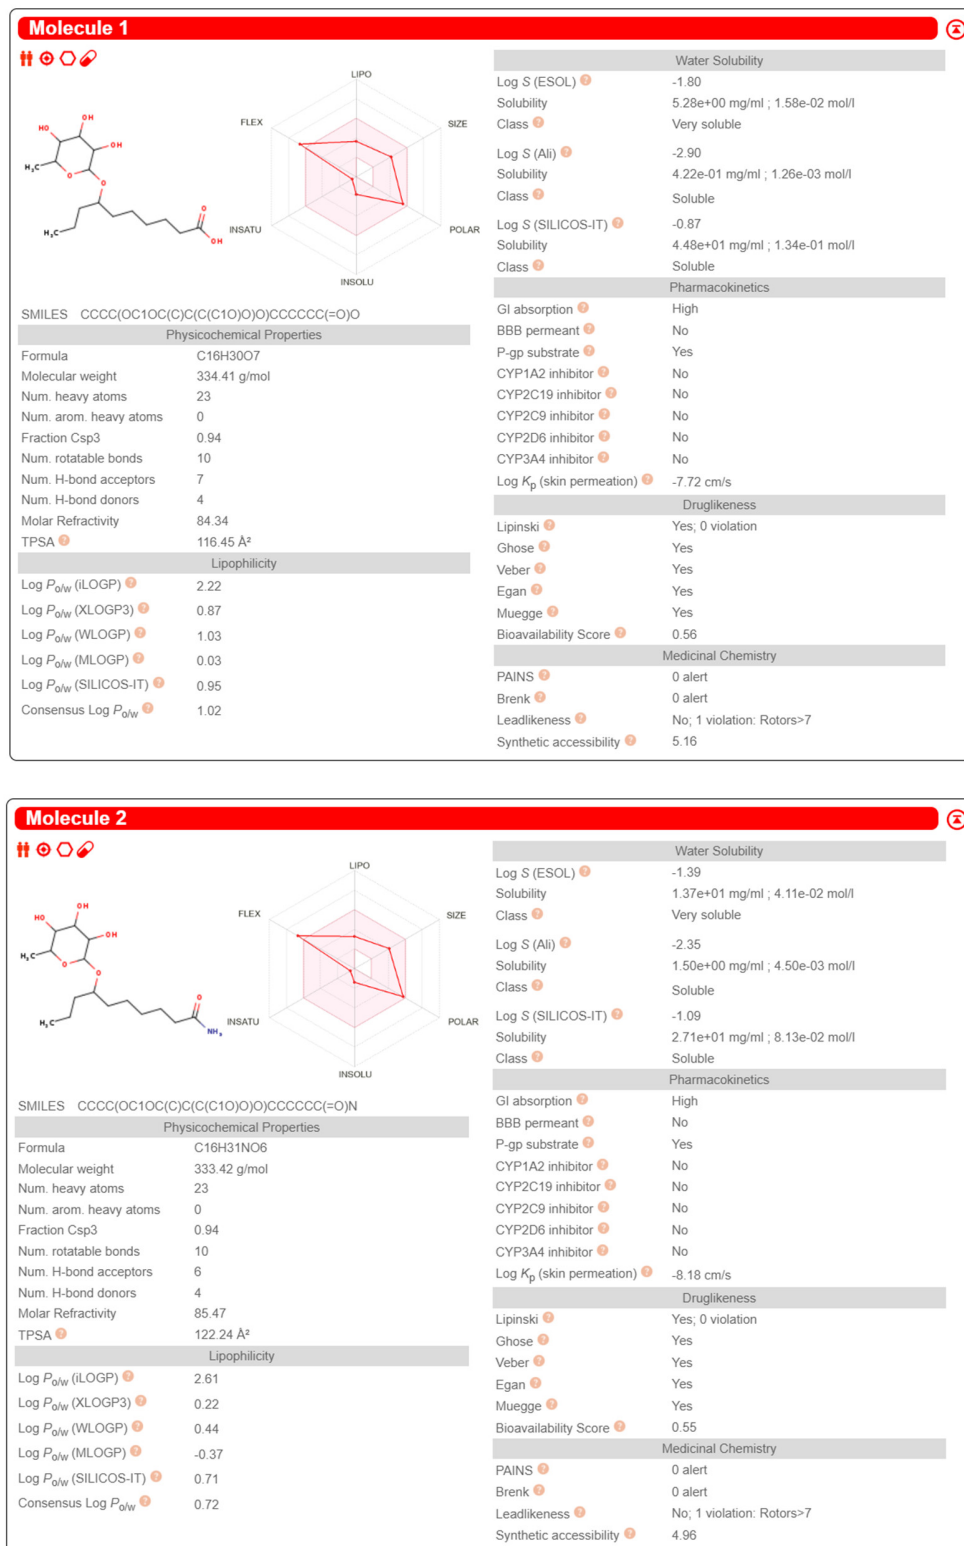



### Molecule 3

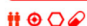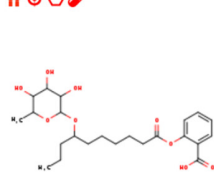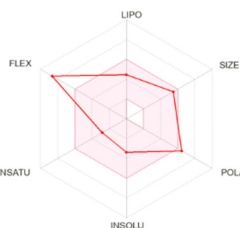

SMILES CCCC(OC1OC(C)C(C(C1O)O)O)CCCCC(=O)Oc1ccccc1C(=O)O

#### Physicochemical Properties

|                        |              |
|------------------------|--------------|
| Formula                | C23H34O9     |
| Molecular weight       | 454.51 g/mol |
| Num. heavy atoms       | 32           |
| Num. arom. heavy atoms | 6            |
| Fraction Csp3          | 0.65         |
| Num. rotatable bonds   | 13           |
| Num. H-bond acceptors  | 9            |
| Num. H-bond donors     | 4            |
| Molar Refractivity     | 115.74       |
| TPSA                   | 142.75 Å²    |

#### Lipophilicity

|                           |      |
|---------------------------|------|
| Log $P_{ow}$ (iLOGP)      | 2.83 |
| Log $P_{ow}$ (XLOGP3)     | 2.29 |
| Log $P_{ow}$ (WLOGP)      | 2.25 |
| Log $P_{ow}$ (MLOGP)      | 1.03 |
| Log $P_{ow}$ (SILICOS-IT) | 2.21 |
| Consensus Log $P_{ow}$    | 2.12 |

| Water Solubility            |                                       |
|-----------------------------|---------------------------------------|
| Log S (ESOL)                | -3.38                                 |
| Solubility                  | 1.89e-01 mg/ml ; 4.16e-04 mol/l       |
| Class                       | Soluble                               |
| Log S (Ali)                 | -4.93                                 |
| Solubility                  | 5.40e-03 mg/ml ; 1.19e-05 mol/l       |
| Class                       | Moderately soluble                    |
| Log S (SILICOS-IT)          | -2.98                                 |
| Solubility                  | 4.77e-01 mg/ml ; 1.05e-03 mol/l       |
| Class                       | Soluble                               |
| Pharmacokinetics            |                                       |
| GI absorption               | Low                                   |
| BBB permeant                | No                                    |
| P-gp substrate              | Yes                                   |
| CYP1A2 inhibitor            | No                                    |
| CYP2C19 inhibitor           | No                                    |
| CYP2C9 inhibitor            | No                                    |
| CYP2D6 inhibitor            | No                                    |
| CYP3A4 inhibitor            | Yes                                   |
| Log $K_p$ (skin permeation) | -7.45 cm/s                            |
| Druglikeness                |                                       |
| Lipinski                    | Yes; 0 violation                      |
| Ghose                       | Yes                                   |
| Veber                       | No; 2 violations: Rotors>10, TPSA>140 |
| Egan                        | No; 1 violation: TPSA>131.6           |
| Muegge                      | Yes                                   |
| Bioavailability Score       | 0.56                                  |
| Medicinal Chemistry         |                                       |
| PAINS                       | 0 alert                               |
| Brenk                       | 1 alert: phenol_ester                 |
| Leadlikeness                | No; 2 violations: MW>350, Rotors>7    |
| Synthetic accessibility     | 5.25                                  |

### Molecule 4

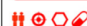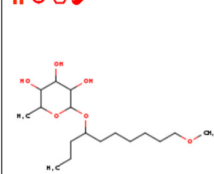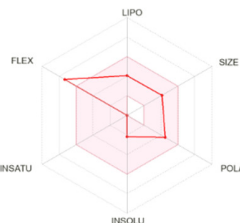

SMILES CCCC(OC1OC(C)C(C(C1O)O)O)CCCCCOC

#### Physicochemical Properties

|                        |              |
|------------------------|--------------|
| Formula                | C17H34O6     |
| Molecular weight       | 334.45 g/mol |
| Num. heavy atoms       | 23           |
| Num. arom. heavy atoms | 0            |
| Fraction Csp3          | 1.00         |
| Num. rotatable bonds   | 11           |
| Num. H-bond acceptors  | 6            |
| Num. H-bond donors     | 3            |
| Molar Refractivity     | 88.46        |
| TPSA                   | 88.38 Å²     |

#### Lipophilicity

|                           |      |
|---------------------------|------|
| Log $P_{ow}$ (iLOGP)      | 2.45 |
| Log $P_{ow}$ (XLOGP3)     | 1.59 |
| Log $P_{ow}$ (WLOGP)      | 1.60 |
| Log $P_{ow}$ (MLOGP)      | 0.41 |
| Log $P_{ow}$ (SILICOS-IT) | 1.94 |
| Consensus Log $P_{ow}$    | 1.60 |

| Water Solubility            |                                 |
|-----------------------------|---------------------------------|
| Log S (ESOL)                | -2.19                           |
| Solubility                  | 2.16e+00 mg/ml ; 6.47e-03 mol/l |
| Class                       | Soluble                         |
| Log S (Ali)                 | -3.06                           |
| Solubility                  | 2.93e-01 mg/ml ; 8.77e-04 mol/l |
| Class                       | Soluble                         |
| Log S (SILICOS-IT)          | -2.03                           |
| Solubility                  | 3.11e+00 mg/ml ; 9.29e-03 mol/l |
| Class                       | Soluble                         |
| Pharmacokinetics            |                                 |
| GI absorption               | High                            |
| BBB permeant                | No                              |
| P-gp substrate              | Yes                             |
| CYP1A2 inhibitor            | No                              |
| CYP2C19 inhibitor           | No                              |
| CYP2C9 inhibitor            | No                              |
| CYP2D6 inhibitor            | No                              |
| CYP3A4 inhibitor            | No                              |
| Log $K_p$ (skin permeation) | -7.21 cm/s                      |
| Druglikeness                |                                 |
| Lipinski                    | Yes; 0 violation                |
| Ghose                       | Yes                             |
| Veber                       | No; 1 violation: Rotors>10      |
| Egan                        | Yes                             |
| Muegge                      | Yes                             |
| Bioavailability Score       | 0.55                            |
| Medicinal Chemistry         |                                 |
| PAINS                       | 0 alert                         |
| Brenk                       | 0 alert                         |
| Leadlikeness                | No; 1 violation: Rotors>7       |
| Synthetic accessibility     | 5.52                            |

## Molecule 5

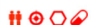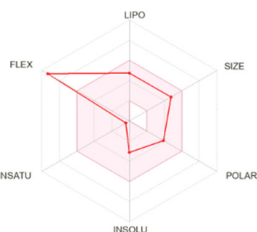

SMILES CCCC(OC1OC(C)C(C(C1OC)OC)OC)CCCCC(=O)OC

### Physicochemical Properties

|                        |              |
|------------------------|--------------|
| Formula                | C20H38O7     |
| Molecular weight       | 390.51 g/mol |
| Num. heavy atoms       | 27           |
| Num. arom. heavy atoms | 0            |
| Fraction Csp3          | 0.95         |
| Num. rotatable bonds   | 14           |
| Num. H-bond acceptors  | 7            |
| Num. H-bond donors     | 0            |
| Molar Refractivity     | 102.85       |
| TPSA                   | 72.45 Å²     |

### Lipophilicity

|                           |      |
|---------------------------|------|
| Log $P_{ow}$ (iLOGP)      | 4.23 |
| Log $P_{ow}$ (XLOGP3)     | 2.81 |
| Log $P_{ow}$ (WLOGP)      | 3.09 |
| Log $P_{ow}$ (MLOGP)      | 0.98 |
| Log $P_{ow}$ (SILICOS-IT) | 3.20 |
| Consensus Log $P_{ow}$    | 2.86 |

### Water Solubility

|                    |                                 |
|--------------------|---------------------------------|
| Log S (ESOL)       | -3.11                           |
| Solubility         | 3.05e-01 mg/ml ; 7.81e-04 mol/l |
| Class              | Soluble                         |
| Log S (Ali)        | -3.99                           |
| Solubility         | 4.01e-02 mg/ml ; 1.03e-04 mol/l |
| Class              | Soluble                         |
| Log S (SILICOS-IT) | -3.64                           |
| Solubility         | 8.88e-02 mg/ml ; 2.28e-04 mol/l |
| Class              | Soluble                         |

### Pharmacokinetics

|                             |            |
|-----------------------------|------------|
| GI absorption               | High       |
| BBB permeant                | Yes        |
| P-gp substrate              | No         |
| CYP1A2 inhibitor            | No         |
| CYP2C19 inhibitor           | No         |
| CYP2C9 inhibitor            | No         |
| CYP2D6 inhibitor            | Yes        |
| CYP3A4 inhibitor            | No         |
| Log $K_p$ (skin permeation) | -6.69 cm/s |

### Druglikeness

|                       |                            |
|-----------------------|----------------------------|
| Lipinski              | Yes; 0 violation           |
| Ghose                 | Yes                        |
| Veber                 | No; 1 violation: Rotors>10 |
| Egan                  | Yes                        |
| Muegge                | Yes                        |
| Bioavailability Score | 0.55                       |

### Medicinal Chemistry

|                         |                                    |
|-------------------------|------------------------------------|
| PAINS                   | 0 alert                            |
| Brenk                   | 0 alert                            |
| Leadlikeness            | No; 2 violations: MW>350, Rotors>7 |
| Synthetic accessibility | 5.61                               |

## Molecule 12

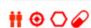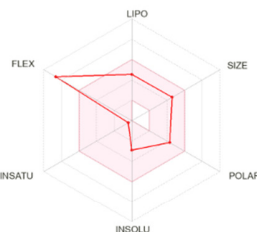

SMILES CCCC(OC1OC(C)C(C(C1OC)OC)OC)CCCCC(=O)O

### Physicochemical Properties

|                        |              |
|------------------------|--------------|
| Formula                | C19H36O7     |
| Molecular weight       | 376.48 g/mol |
| Num. heavy atoms       | 26           |
| Num. arom. heavy atoms | 0            |
| Fraction Csp3          | 0.95         |
| Num. rotatable bonds   | 13           |
| Num. H-bond acceptors  | 7            |
| Num. H-bond donors     | 1            |
| Molar Refractivity     | 98.53        |
| TPSA                   | 83.45 Å²     |

### Lipophilicity

|                           |      |
|---------------------------|------|
| Log $P_{ow}$ (iLOGP)      | 3.27 |
| Log $P_{ow}$ (XLOGP3)     | 2.48 |
| Log $P_{ow}$ (WLOGP)      | 3.00 |
| Log $P_{ow}$ (MLOGP)      | 0.75 |
| Log $P_{ow}$ (SILICOS-IT) | 2.64 |
| Consensus Log $P_{ow}$    | 2.43 |

### Water Solubility

|                    |                                 |
|--------------------|---------------------------------|
| Log S (ESOL)       | -2.88                           |
| Solubility         | 4.98e-01 mg/ml ; 1.32e-03 mol/l |
| Class              | Soluble                         |
| Log S (Ali)        | -3.88                           |
| Solubility         | 5.00e-02 mg/ml ; 1.33e-04 mol/l |
| Class              | Soluble                         |
| Log S (SILICOS-IT) | -2.95                           |
| Solubility         | 4.21e-01 mg/ml ; 1.12e-03 mol/l |
| Class              | Soluble                         |

### Pharmacokinetics

|                             |            |
|-----------------------------|------------|
| GI absorption               | High       |
| BBB permeant                | No         |
| P-gp substrate              | No         |
| CYP1A2 inhibitor            | No         |
| CYP2C19 inhibitor           | No         |
| CYP2C9 inhibitor            | No         |
| CYP2D6 inhibitor            | No         |
| CYP3A4 inhibitor            | No         |
| Log $K_p$ (skin permeation) | -6.84 cm/s |

### Druglikeness

|                       |                            |
|-----------------------|----------------------------|
| Lipinski              | Yes; 0 violation           |
| Ghose                 | Yes                        |
| Veber                 | No; 1 violation: Rotors>10 |
| Egan                  | Yes                        |
| Muegge                | Yes                        |
| Bioavailability Score | 0.56                       |

### Medicinal Chemistry

|                         |                                    |
|-------------------------|------------------------------------|
| PAINS                   | 0 alert                            |
| Brenk                   | 0 alert                            |
| Leadlikeness            | No; 2 violations: MW>350, Rotors>7 |
| Synthetic accessibility | 5.51                               |

## Molecule 13

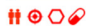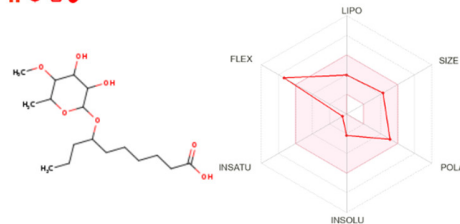

SMILES CCCC(OC1OC(C)C(C(C1O)O)OC)CCCCC(=O)O

### Physicochemical Properties

|                        |              |
|------------------------|--------------|
| Formula                | C17H32O7     |
| Molecular weight       | 348.43 g/mol |
| Num. heavy atoms       | 24           |
| Num. arom. heavy atoms | 0            |
| Fraction Csp3          | 0.94         |
| Num. rotatable bonds   | 11           |
| Num. H-bond acceptors  | 7            |
| Num. H-bond donors     | 3            |
| Molar Refractivity     | 89.07        |
| TPSA                   | 105.45 Å²    |

### Lipophilicity

|                           |      |
|---------------------------|------|
| Log $P_{ow}$ (iLOGP)      | 2.41 |
| Log $P_{ow}$ (XLOGP3)     | 1.41 |
| Log $P_{ow}$ (WLOGP)      | 1.69 |
| Log $P_{ow}$ (MLOGP)      | 0.28 |
| Log $P_{ow}$ (SILICOS-IT) | 1.51 |
| Consensus Log $P_{ow}$    | 1.46 |

| Water Solubility   |                                 |
|--------------------|---------------------------------|
| Log S (ESOL)       | -2.16                           |
| Solubility         | 2.40e+00 mg/ml ; 6.88e-03 mol/l |
| Class              | Soluble                         |
| Log S (Ali)        | -3.23                           |
| Solubility         | 2.06e-01 mg/ml ; 5.90e-04 mol/l |
| Class              | Soluble                         |
| Log S (SILICOS-IT) | -1.57                           |
| Solubility         | 9.44e+00 mg/ml ; 2.71e-02 mol/l |
| Class              | Soluble                         |

### Pharmacokinetics

|                             |            |
|-----------------------------|------------|
| GI absorption               | High       |
| BBB permeant                | No         |
| P-gp substrate              | Yes        |
| CYP1A2 inhibitor            | No         |
| CYP2C19 inhibitor           | No         |
| CYP2C9 inhibitor            | No         |
| CYP2D6 inhibitor            | No         |
| CYP3A4 inhibitor            | No         |
| Log $K_p$ (skin permeation) | -7.42 cm/s |

### Druglikeness

|                       |                            |
|-----------------------|----------------------------|
| Lipinski              | Yes; 0 violation           |
| Ghose                 | Yes                        |
| Veber                 | No; 1 violation: Rotors>10 |
| Egan                  | Yes                        |
| Muegge                | Yes                        |
| Bioavailability Score | 0.56                       |

### Medicinal Chemistry

|                         |                           |
|-------------------------|---------------------------|
| PAINS                   | 0 alert                   |
| Brenk                   | 0 alert                   |
| Leadlikeness            | No; 1 violation: Rotors>7 |
| Synthetic accessibility | 5.32                      |

## Molecule 14

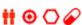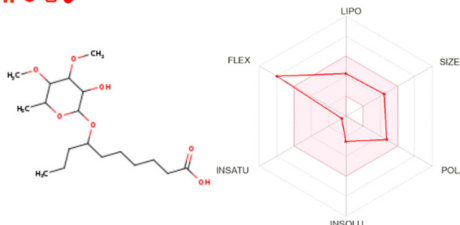

SMILES CCCC(OC1OC(C)C(C(C1O)O)OC)CCCCC(=O)O

### Physicochemical Properties

|                        |              |
|------------------------|--------------|
| Formula                | C18H34O7     |
| Molecular weight       | 362.46 g/mol |
| Num. heavy atoms       | 25           |
| Num. arom. heavy atoms | 0            |
| Fraction Csp3          | 0.94         |
| Num. rotatable bonds   | 12           |
| Num. H-bond acceptors  | 7            |
| Num. H-bond donors     | 2            |
| Molar Refractivity     | 93.80        |
| TPSA                   | 94.45 Å²     |

### Lipophilicity

|                           |      |
|---------------------------|------|
| Log $P_{ow}$ (iLOGP)      | 3.46 |
| Log $P_{ow}$ (XLOGP3)     | 1.95 |
| Log $P_{ow}$ (WLOGP)      | 2.34 |
| Log $P_{ow}$ (MLOGP)      | 0.52 |
| Log $P_{ow}$ (SILICOS-IT) | 2.07 |
| Consensus Log $P_{ow}$    | 2.07 |

| Water Solubility   |                                 |
|--------------------|---------------------------------|
| Log S (ESOL)       | -2.52                           |
| Solubility         | 1.09e+00 mg/ml ; 2.99e-03 mol/l |
| Class              | Soluble                         |
| Log S (Ali)        | -3.56                           |
| Solubility         | 1.00e-01 mg/ml ; 2.77e-04 mol/l |
| Class              | Soluble                         |
| Log S (SILICOS-IT) | -2.26                           |
| Solubility         | 2.00e+00 mg/ml ; 5.51e-03 mol/l |
| Class              | Soluble                         |

### Pharmacokinetics

|                             |            |
|-----------------------------|------------|
| GI absorption               | High       |
| BBB permeant                | No         |
| P-gp substrate              | No         |
| CYP1A2 inhibitor            | No         |
| CYP2C19 inhibitor           | No         |
| CYP2C9 inhibitor            | No         |
| CYP2D6 inhibitor            | No         |
| CYP3A4 inhibitor            | No         |
| Log $K_p$ (skin permeation) | -7.13 cm/s |

### Druglikeness

|                       |                            |
|-----------------------|----------------------------|
| Lipinski              | Yes; 0 violation           |
| Ghose                 | Yes                        |
| Veber                 | No; 1 violation: Rotors>10 |
| Egan                  | Yes                        |
| Muegge                | Yes                        |
| Bioavailability Score | 0.56                       |

### Medicinal Chemistry

|                         |                                    |
|-------------------------|------------------------------------|
| PAINS                   | 0 alert                            |
| Brenk                   | 0 alert                            |
| Leadlikeness            | No; 2 violations: MW>350, Rotors>7 |
| Synthetic accessibility | 5.39                               |

## Molecule 15

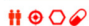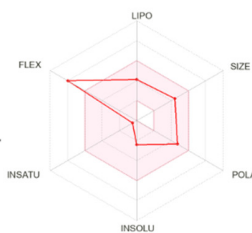

SMILES CCCC(OC1OC(C)C(C(C1O)O)OC)CCCCC(=O)OC

### Physicochemical Properties

|                        |              |
|------------------------|--------------|
| Formula                | C18H34O7     |
| Molecular weight       | 362.46 g/mol |
| Num. heavy atoms       | 25           |
| Num. arom. heavy atoms | 0            |
| Fraction Csp3          | 0.94         |
| Num. rotatable bonds   | 12           |
| Num. H-bond acceptors  | 7            |
| Num. H-bond donors     | 2            |
| Molar Refractivity     | 93.39        |
| TPSA                   | 94.45 Å²     |

### Lipophilicity

|                            |      |
|----------------------------|------|
| Log $P_{o/w}$ (ILOP)       | 3.84 |
| Log $P_{o/w}$ (XLOGP3)     | 1.74 |
| Log $P_{o/w}$ (WLOGP)      | 1.78 |
| Log $P_{o/w}$ (MLOGP)      | 0.52 |
| Log $P_{o/w}$ (SILICOS-IT) | 2.07 |
| Consensus Log $P_{o/w}$    | 1.99 |

### Water Solubility

|                    |                                 |
|--------------------|---------------------------------|
| Log S (ESOL)       | -2.39                           |
| Solubility         | 1.47e+00 mg/ml ; 4.06e-03 mol/l |
| Class              | Soluble                         |
| Log S (Ali)        | -3.34                           |
| Solubility         | 1.66e-01 mg/ml ; 4.57e-04 mol/l |
| Class              | Soluble                         |
| Log S (SILICOS-IT) | -2.26                           |
| Solubility         | 2.00e+00 mg/ml ; 5.51e-03 mol/l |
| Class              | Soluble                         |

### Pharmacokinetics

|                             |            |
|-----------------------------|------------|
| GI absorption               | High       |
| BBB permeant                | No         |
| P-gp substrate              | Yes        |
| CYP1A2 inhibitor            | No         |
| CYP2C19 inhibitor           | No         |
| CYP2C9 inhibitor            | No         |
| CYP2D6 inhibitor            | No         |
| CYP3A4 inhibitor            | No         |
| Log $K_p$ (skin permeation) | -7.28 cm/s |

### Druglikeness

|                       |                            |
|-----------------------|----------------------------|
| Lipinski              | Yes; 0 violation           |
| Ghose                 | Yes                        |
| Veber                 | No; 1 violation: Rotors>10 |
| Egan                  | Yes                        |
| Muegge                | Yes                        |
| Bioavailability Score | 0.55                       |

### Medicinal Chemistry

|                         |                                    |
|-------------------------|------------------------------------|
| PAINS                   | 0 alert                            |
| Brenk                   | 0 alert                            |
| Leadlikeness            | No; 2 violations: MW>350, Rotors>7 |
| Synthetic accessibility | 5.42                               |

**Figure S5.** BOILED-Egg model for 60-derivatives and compounds (a-f) and 60 to 60h. Compound (b) is seen outside the boundaries of the plot.

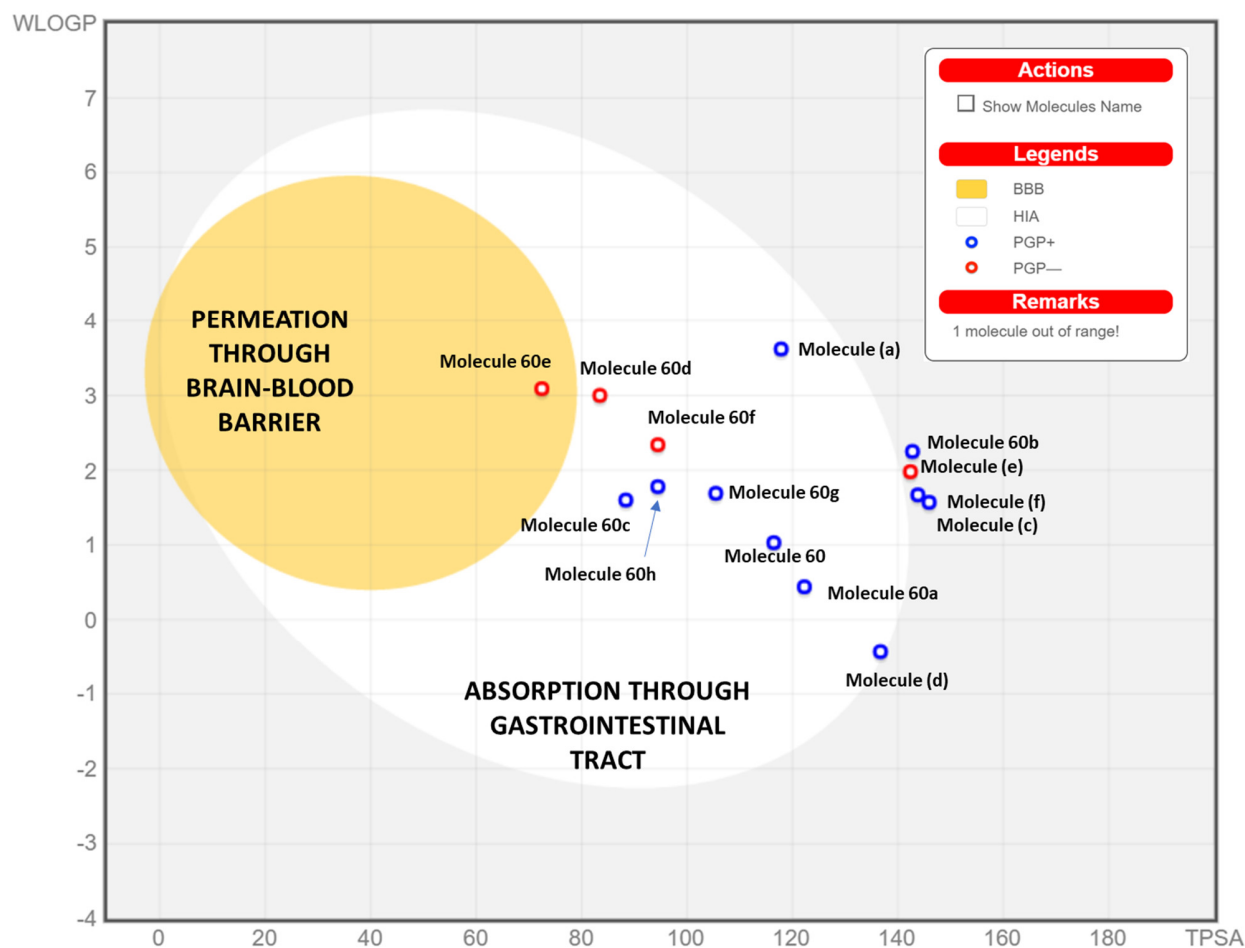

**Table S1.** Complete list of descriptors from the Dragon package

| Dimension | Descriptor family       | Descriptor                                                                                                                                                                                                                                                                                                                                                                                                                                                                                                                                                                                                                                                                                                                                                                                   |
|-----------|-------------------------|----------------------------------------------------------------------------------------------------------------------------------------------------------------------------------------------------------------------------------------------------------------------------------------------------------------------------------------------------------------------------------------------------------------------------------------------------------------------------------------------------------------------------------------------------------------------------------------------------------------------------------------------------------------------------------------------------------------------------------------------------------------------------------------------|
| 0D        | Constitutional          | MW, AMW, Sv, Se, Sp, Ss, Mv, Me, Mp, Ms, nAT, nSK, nBT, nBO, nBM, SCBO, ARR, nCIC, nCIR, RBN, RBF, nDB, nTB, nAB, nH, nC, nN, nO, nS, nF, nCL, nBR, nL, nX, nR03, nR04, nR05, nR06, nR07, nR08, nR09, nR10, nR11, nR12, nBnz                                                                                                                                                                                                                                                                                                                                                                                                                                                                                                                                                                 |
| 1D        | Functional group counts | nCp, nCs, nCt, nCq, nCrs, nCrt, nCrq, nCar, nCbH, nCb-, nCconj, nR=Cp, nR=Cs, nR=Ct, nR#CH/X, nR#C-, nRCOOH, nArCOOH, nRCOOR, nArCOOR, nRCONH2, nRCONHR, nArCONHR, nRCONR2, nArCONR2, nROCON, nArOCON, nArCOSR, nRCO, nArCO, nCONN, nN=C-N<, nC(=N)N2, nRC=N, nArC=N, nArCNO, nRNH2, nArNH2, nRNHR, nArNHR, nRNR2, nArNR2, nN-N, nRCN, nArCN nN+, nNq, nRNHO, nArNHO, nArNO2, nN(CO)2, nC=N-N<, nROH, nArOH, nOHp, nOHs, nOHt, nROR, nArOR, nRSR, nSO, nS(=O)2, nSO2OH, nSO3OH, nSO2N, nCH2RX, nR=CRX, nCHRX2, nCRX3, nArX, nCXr, nCXr=, nCconjX, nOxiranes, nAzetidines, nBeta-Lactams, nPyrrolidines, nOxolanes, nPyrroles, nPyrazoles, nImidazoles, nFuranes, nThiophenes, nIsoxazoles, nThiazoles, nTriazoles, nPyridines, nPyridazines, nPyrimidines, nPyrazines, nHDon, nHAcc, nHBonds |
|           | Atom-centred fragments  | C-001, C-002, C-003, C-004, C-005, C-006, C-007, C-008, C-009, C-010, C-011, C-012, C-013, C-014, C-015, C-016, C-017, C-018, C-019, C-020, C-021, C-022, C-024, C-025, C-026, C-027, C-028, C-029, C-030, C-031, C-032, C-033, C-034, C-035, C-036, C-037, C-038, C-039, C-040, C-041, C-042, C-043, C-044, H-046, H-047, H-048, H-049, H-050, H-051, H-052, H-053, H-054, O-056, O-057, O-058, O-059, O-060, O-061, N-066, N-067, N-068, N-069, N-070, N-071, N-072, N-073, N-074, N-075, N-076, N-077, N-078, N-079, F-081, F-082, F-083, F-084, F-085, Cl-086, Cl-089, Cl-090, Br-091, Br-092, Br-094, S-106, S-107, S-108, S-109, S-110                                                                                                                                                 |
| 2D        | Topological             | ZM1, ZM1V, ZM2, ZM2V, Qindex, SNar, HNar, GNar, Xt, Dz, Ram, Pol, LPRS, VDA, MSD, SMTI, SMTIV, GMTI, GMTIV, Xu, SPI, W WA, Har, Har2, QW, TI1, TI2, STN, HyDp, RHyDp, w, ww, Rww, D/D, Wap, WhetZ, Whetm, Whetv, Whete, Whetp, J, JhetZ, Jhetm, Jhetv, Jhete, Jhetp, MAXDN, MAXDP, DELS, TIE, S0K, S1K, S2K, S3K, PHI, BLI, PW2, PW3, PW4, PW5, PJI2, CSI, ECC, AECC, DECC, MDDD, UNIP, CENT, VAR, BAC, Lop, ICR, D/Dr03, D/Dr04, D/Dr05, D/Dr06, D/Dr07, D/Dr08, D/Dr09, D/Dr10, D/Dr11, D/Dr12, T(N..N), T(N..O), T(N..S), T(N..F), T(N..Cl), T(N..Br), T(N..I), T(O..O), T(O..S), T(O..F), T(O..Cl), T(O..Br), T(S..S), T(S..F), T(S..Cl), T(S..Br), T(F..F), T(F..Cl), T(F..Br), T(Cl..Cl), T(Cl..Br), T(Br..Br)                                                                         |



|       |                            |                                                                                                                                                                                                                                                                                                                                                                                                                                                                                                                                                                                                                                                                                                                                                                |
|-------|----------------------------|----------------------------------------------------------------------------------------------------------------------------------------------------------------------------------------------------------------------------------------------------------------------------------------------------------------------------------------------------------------------------------------------------------------------------------------------------------------------------------------------------------------------------------------------------------------------------------------------------------------------------------------------------------------------------------------------------------------------------------------------------------------|
|       | Connectivity indices       | X0, X1, X2, X3, X4, X5, X0A, X1A, X2A, X3A, X4A, X5A, X0v, X1v, X2v, X3v, X4v, X5v, X0Av, X1Av, X2Av, X3Av, X4Av, X5Av, X0sol, X1sol, X2sol, X3sol, X4sol, X5sol, XMOD, RDCHI, RDSQ                                                                                                                                                                                                                                                                                                                                                                                                                                                                                                                                                                            |
|       | 2D-autocorrelations        | ATS1m, ATS2m, ATS3m, ATS4m, ATS5m, ATS6m, ATS7m, ATS8m, ATS1v, ATS2v, ATS3v, ATS4v, ATS5v, ATS6v, ATS7v, ATS8v, ATS1e, ATS2e, ATS3e, ATS4e, ATS5e, ATS6e, ATS7e, ATS8e, ATS1p, ATS2p, ATS3p, ATS4p, ATS5p, ATS6p, ATS7p, ATS8p, MATS1m, MATS2m, MATS3m, MATS4m, MATS5m, MATS6m, MATS7m, MATS8m, MATS1v, MATS2v, MATS3v, MATS4v, MATS5v, MATS6v, MATS7v, MATS8v, MATS1e, MATS2e, MATS3e, MATS4e, MATS5e, MATS6e, MATS7e, MATS8e, MATS1p, MATS2p, MATS3p, MATS4p, MATS5p, MATS6p, MATS7p, MATS8p, GATS1m, GATS2m, GATS3m, GATS4m, GATS5m, GATS6m, GATS7m, GATS8m, GATS1v, GATS2v, GATS3v, GATS4v, GATS5v, GATS6v, GATS7v, GATS8v, GATS1e, GATS2e, GATS3e, GATS4e, GATS5e, GATS6e, GATS7e, GATS8e, GATS1p, GATS2p, GATS3p, GATS4p, GATS5p, GATS6p, GATS7p, GATS8p |
|       | Topological charge indices | GGI1, GGI2, GGI3, GGI4, GGI5, GGI6, GGI7, GGI8, GGI9, GGI10, JGI1, JGI2, JGI3, JGI4, JGI5, JGI6, JGI7, JGI8, JGI9, JGI10, JGT                                                                                                                                                                                                                                                                                                                                                                                                                                                                                                                                                                                                                                  |
| Other | Molecular properties       | Ui, Hy, Hy2, AMR, TPSA(NO), TPSA(Tot), MLOGP, MLOGP2, ALOGP, ALOGP2                                                                                                                                                                                                                                                                                                                                                                                                                                                                                                                                                                                                                                                                                            |



|    |      |       |         |       |   |   |   |   |   |   |   |   |   |   |   |   |       |
|----|------|-------|---------|-------|---|---|---|---|---|---|---|---|---|---|---|---|-------|
| 25 | L065 | 4.954 | 0       | 0     | 0 | 0 | 0 | 0 | 1 | 0 | 0 | 0 | 0 | 0 | 0 | 0 | 1.151 |
| 26 | L066 | 4.866 | 0       | 0     | 0 | 0 | 0 | 0 | 0 | 0 | 0 | 0 | 0 | 0 | 0 | 0 | 1.903 |
| 27 | L068 | 3.860 | 174.064 | 1.024 | 0 | 0 | 0 | 0 | 6 | 0 | 0 | 0 | 0 | 1 | 0 | 1 | 6.104 |
| 28 | L069 | 4.161 | 103.491 | 1.083 | 0 | 0 | 0 | 0 | 7 | 0 | 0 | 0 | 0 | 0 | 0 | 1 | 6.652 |
| 29 | L071 | 4.161 | 103.491 | 1.083 | 0 | 0 | 0 | 0 | 7 | 0 | 0 | 0 | 0 | 0 | 0 | 1 | 6.652 |
| 30 | L072 | 3.860 | 174.064 | 1.024 | 0 | 0 | 0 | 0 | 6 | 0 | 0 | 0 | 0 | 1 | 0 | 1 | 6.104 |
| 31 | L073 | 4.161 | 103.491 | 1.083 | 0 | 0 | 0 | 0 | 7 | 0 | 0 | 0 | 0 | 0 | 0 | 1 | 6.652 |
| 32 | L075 | 4.602 | 192.468 | 0.583 | 0 | 0 | 0 | 0 | 2 | 1 | 0 | 0 | 0 | 0 | 0 | 0 | 5.375 |
| 33 | L078 | 4.602 | 134.267 | 0.768 | 0 | 0 | 0 | 1 | 2 | 0 | 0 | 0 | 0 | 0 | 1 | 0 | 5.196 |
| 34 | L079 | 4.886 | 184.526 | 0.478 | 0 | 0 | 0 | 0 | 1 | 0 | 0 | 0 | 0 | 0 | 0 | 0 | 5.538 |
| 35 | L080 | 4.001 | 172.414 | 0.434 | 0 | 0 | 0 | 0 | 1 | 0 | 0 | 0 | 0 | 0 | 0 | 0 | 4.911 |
| 36 | L081 | 4.601 | 172.414 | 0.415 | 0 | 0 | 0 | 0 | 1 | 0 | 0 | 0 | 0 | 0 | 0 | 0 | 4.911 |
| 37 | L085 | 4.301 | 194.887 | 0.532 | 0 | 0 | 0 | 1 | 1 | 0 | 0 | 0 | 0 | 0 | 1 | 0 | 6.026 |
| 38 | L086 | 4.301 | 147.072 | 0.7   | 0 | 0 | 0 | 0 | 1 | 0 | 0 | 0 | 0 | 0 | 0 | 0 | 5.196 |
| 39 | L087 | 4.301 | 161.596 | 0.554 | 0 | 0 | 0 | 0 | 1 | 0 | 0 | 0 | 0 | 0 | 0 | 0 | 5.275 |
| 40 | L088 | 4.601 | 300.32  | 0.517 | 0 | 0 | 0 | 0 | 1 | 0 | 0 | 0 | 0 | 0 | 0 | 0 | 5.946 |
| 41 | L089 | 4.602 | 200.544 | 0.471 | 0 | 0 | 0 | 0 | 1 | 0 | 0 | 0 | 0 | 0 | 0 | 0 | 5.771 |
| 42 | L090 | 4.888 | 200.015 | 0.455 | 0 | 0 | 0 | 0 | 1 | 0 | 0 | 0 | 0 | 0 | 0 | 0 | 5.731 |
| 43 | L091 | 4.889 | 180.977 | 0.478 | 0 | 0 | 0 | 0 | 1 | 0 | 0 | 0 | 0 | 0 | 0 | 0 | 5.538 |
| 44 | L092 | 4.302 | 300.32  | 0.519 | 0 | 0 | 0 | 0 | 1 | 0 | 0 | 0 | 0 | 0 | 0 | 0 | 5.946 |
| 45 | L094 | 4.001 | 283.527 | 0.476 | 0 | 0 | 0 | 0 | 1 | 0 | 0 | 0 | 0 | 2 | 1 | 0 | 5.652 |
| 46 | L095 | 4.000 | 374.177 | 0.459 | 0 | 0 | 0 | 0 | 1 | 0 | 0 | 0 | 0 | 0 | 0 | 0 | 6.794 |
| 47 | L099 | 4.297 | 315.792 | 0.497 | 0 | 0 | 0 | 0 | 1 | 0 | 0 | 0 | 0 | 0 | 1 | 0 | 5.797 |
| 48 | L100 | 4.000 | 184.811 | 0.422 | 0 | 0 | 0 | 0 | 1 | 0 | 0 | 0 | 0 | 6 | 1 | 0 | 5.457 |
| 49 | L103 | 5.404 | 703.965 | 1.071 | 0 | 0 | 1 | 0 | 3 | 1 | 0 | 1 | 0 | 0 | 2 | 0 | 5.401 |
| 50 | L104 | 5.417 | 703.965 | 0.499 | 0 | 0 | 1 | 0 | 3 | 1 | 0 | 1 | 0 | 0 | 2 | 0 | 5.401 |
| 51 | L105 | 4.817 | 722.498 | 1.212 | 0 | 0 | 1 | 0 | 3 | 2 | 0 | 1 | 0 | 0 | 2 | 0 | 5.462 |
| 52 | L106 | 5.432 | 722.498 | 1.375 | 0 | 0 | 1 | 0 | 3 | 1 | 0 | 1 | 0 | 0 | 2 | 0 | 5.462 |
| 53 | L107 | 5.114 | 722.498 | 1.014 | 0 | 0 | 1 | 0 | 3 | 1 | 0 | 1 | 0 | 0 | 2 | 0 | 5.462 |

|    |      |       |          |       |   |   |   |   |   |   |   |   |   |   |   |   |       |
|----|------|-------|----------|-------|---|---|---|---|---|---|---|---|---|---|---|---|-------|
| 54 | L108 | 5.728 | 742.503  | 0.993 | 0 | 0 | 1 | 0 | 3 | 1 | 0 | 1 | 0 | 0 | 2 | 0 | 5.527 |
| 55 | L109 | 4.212 | 722.498  | 1.061 | 0 | 0 | 1 | 0 | 5 | 1 | 0 | 1 | 0 | 0 | 2 | 0 | 5.462 |
| 56 | L110 | 4.213 | 722.498  | 1.121 | 0 | 0 | 1 | 0 | 4 | 2 | 0 | 1 | 0 | 0 | 2 | 0 | 5.462 |
| 57 | L111 | 4.292 | 1025.798 | 1.001 | 0 | 0 | 1 | 0 | 3 | 2 | 0 | 1 | 0 | 0 | 2 | 0 | 6.193 |
| 58 | L112 | 4.512 | 731.017  | 1.054 | 0 | 0 | 1 | 0 | 3 | 2 | 0 | 1 | 0 | 0 | 2 | 0 | 5.344 |
| 59 | L113 | 4.199 | 703.965  | 1.034 | 0 | 0 | 1 | 0 | 3 | 1 | 0 | 0 | 0 | 0 | 2 | 0 | 5.401 |
| 60 | L114 | 4.200 | 703.965  | 1.023 | 0 | 0 | 1 | 0 | 3 | 2 | 0 | 1 | 0 | 0 | 3 | 0 | 5.401 |
| 61 | L115 | 4.801 | 703.965  | 1.084 | 0 | 0 | 1 | 0 | 3 | 1 | 0 | 0 | 0 | 0 | 1 | 0 | 5.401 |
| 62 | L116 | 4.790 | 677.622  | 1.03  | 0 | 0 | 1 | 0 | 2 | 1 | 0 | 0 | 0 | 0 | 2 | 0 | 5.215 |
| 63 | L117 | 4.501 | 704.487  | 1.031 | 0 | 0 | 1 | 0 | 2 | 1 | 0 | 0 | 0 | 0 | 2 | 0 | 5.403 |
| 64 | L119 | 4.200 | 703.965  | 1.023 | 0 | 0 | 1 | 0 | 2 | 1 | 0 | 0 | 0 | 0 | 2 | 0 | 5.401 |
| 65 | L121 | 4.210 | 714.564  | 0.998 | 0 | 0 | 1 | 0 | 2 | 1 | 0 | 0 | 0 | 0 | 2 | 0 | 5.405 |
| 66 | L122 | 4.218 | 695.315  | 1.097 | 0 | 0 | 1 | 0 | 2 | 1 | 0 | 0 | 0 | 0 | 2 | 0 | 5.309 |
| 67 | L123 | 5.105 | 677.622  | 0.537 | 0 | 0 | 1 | 0 | 2 | 1 | 0 | 0 | 0 | 0 | 2 | 0 | 5.215 |
| 68 | L124 | 5.406 | 677.622  | 0.489 | 0 | 0 | 1 | 0 | 2 | 1 | 0 | 0 | 0 | 0 | 2 | 0 | 5.215 |
| 69 | L125 | 4.229 | 722.767  | 0.538 | 0 | 0 | 1 | 0 | 2 | 1 | 0 | 0 | 0 | 0 | 2 | 0 | 5.537 |
| 70 | L126 | 4.229 | 724.099  | 0.508 | 0 | 0 | 1 | 0 | 2 | 1 | 0 | 0 | 0 | 0 | 2 | 0 | 5.549 |
| 71 | L127 | 4.188 | 677.622  | 1.03  | 0 | 0 | 1 | 0 | 2 | 1 | 0 | 1 | 0 | 0 | 2 | 0 | 5.215 |
| 72 | L128 | 4.189 | 677.622  | 1.067 | 0 | 0 | 1 | 0 | 2 | 1 | 0 | 1 | 0 | 0 | 3 | 0 | 5.215 |
| 73 | L129 | 4.189 | 677.622  | 1.018 | 0 | 0 | 1 | 0 | 2 | 2 | 0 | 1 | 0 | 0 | 3 | 0 | 5.215 |
| 74 | L130 | 5.090 | 677.622  | 1.045 | 0 | 0 | 1 | 0 | 2 | 1 | 0 | 0 | 0 | 0 | 1 | 0 | 5.215 |
| 75 | L131 | 4.805 | 696.155  | 1.189 | 0 | 0 | 1 | 0 | 2 | 1 | 0 | 0 | 0 | 0 | 1 | 0 | 5.301 |
| 76 | L132 | 4.819 | 696.155  | 1.373 | 0 | 0 | 1 | 0 | 2 | 1 | 0 | 0 | 0 | 0 | 1 | 0 | 5.301 |
| 77 | L133 | 4.217 | 695.315  | 1.095 | 0 | 0 | 1 | 0 | 2 | 1 | 0 | 0 | 0 | 0 | 1 | 0 | 5.309 |
| 78 | L134 | 4.244 | 713.848  | 1.245 | 0 | 0 | 1 | 0 | 2 | 1 | 0 | 0 | 0 | 0 | 1 | 0 | 5.379 |
| 79 | L135 | 4.244 | 716.145  | 0.95  | 0 | 0 | 1 | 0 | 2 | 1 | 0 | 0 | 0 | 0 | 1 | 0 | 5.408 |
| 80 | L136 | 4.244 | 715.304  | 0.795 | 0 | 0 | 1 | 0 | 2 | 1 | 0 | 0 | 0 | 0 | 1 | 0 | 5.412 |
| 81 | L137 | 4.789 | 677.622  | 1.072 | 0 | 0 | 1 | 0 | 3 | 1 | 0 | 1 | 0 | 0 | 2 | 0 | 5.215 |
| 82 | L138 | 4.187 | 677.622  | 1.099 | 0 | 0 | 1 | 0 | 3 | 1 | 0 | 1 | 0 | 0 | 2 | 0 | 5.215 |

|     |      |       |         |       |   |   |   |   |   |   |   |   |   |   |   |   |       |
|-----|------|-------|---------|-------|---|---|---|---|---|---|---|---|---|---|---|---|-------|
| 83  | L139 | 4.186 | 677.622 | 1.154 | 0 | 0 | 1 | 0 | 4 | 1 | 0 | 1 | 0 | 0 | 2 | 0 | 5.215 |
| 84  | L140 | 4.200 | 700.195 | 1.087 | 0 | 0 | 1 | 0 | 2 | 1 | 0 | 1 | 0 | 0 | 2 | 0 | 5.384 |
| 85  | L141 | 4.501 | 700.861 | 1.1   | 0 | 0 | 1 | 0 | 2 | 1 | 0 | 1 | 0 | 0 | 2 | 0 | 5.39  |
| 86  | L142 | 4.211 | 723.433 | 1.171 | 0 | 0 | 1 | 0 | 2 | 1 | 0 | 1 | 0 | 0 | 2 | 0 | 5.535 |
| 87  | L143 | 5.078 | 555.523 | 1.043 | 0 | 0 | 1 | 0 | 2 | 1 | 0 | 0 | 0 | 0 | 1 | 0 | 5.021 |
| 88  | L144 | 4.283 | 749.397 | 0.998 | 0 | 0 | 1 | 0 | 2 | 1 | 0 | 0 | 0 | 0 | 1 | 0 | 6.278 |
| 89  | L146 | 5.090 | 677.622 | 1.064 | 0 | 0 | 1 | 0 | 2 | 1 | 0 | 0 | 0 | 0 | 2 | 0 | 5.215 |
| 90  | L147 | 5.395 | 637.769 | 0.802 | 0 | 0 | 1 | 0 | 2 | 1 | 0 | 0 | 0 | 0 | 1 | 0 | 5.854 |
| 91  | L149 | 4.175 | 622.7   | 1.016 | 0 | 0 | 1 | 0 | 2 | 1 | 0 | 0 | 0 | 0 | 1 | 0 | 5.662 |
| 92  | L150 | 4.507 | 666.439 | 0.932 | 0 | 0 | 1 | 0 | 2 | 1 | 0 | 0 | 0 | 0 | 1 | 0 | 5.861 |
| 93  | L151 | 4.507 | 666.439 | 0.932 | 0 | 0 | 1 | 0 | 2 | 1 | 0 | 0 | 0 | 0 | 1 | 0 | 5.861 |
| 94  | L152 | 5.061 | 595.049 | 1.235 | 0 | 0 | 1 | 0 | 2 | 1 | 0 | 0 | 0 | 0 | 1 | 0 | 5.35  |
| 95  | L153 | 4.159 | 595.049 | 1.238 | 0 | 0 | 1 | 0 | 2 | 1 | 0 | 0 | 0 | 0 | 2 | 0 | 5.35  |
| 96  | L154 | 5.397 | 640.699 | 0.857 | 0 | 0 | 1 | 0 | 2 | 1 | 0 | 0 | 0 | 0 | 1 | 0 | 5.883 |
| 97  | L155 | 5.085 | 606.39  | 0.814 | 0 | 0 | 1 | 0 | 2 | 1 | 0 | 0 | 0 | 0 | 1 | 0 | 5.313 |
| 98  | L156 | 4.501 | 497.268 | 0.513 | 0 | 0 | 1 | 0 | 2 | 1 | 0 | 0 | 0 | 0 | 2 | 0 | 5.391 |
| 99  | L157 | 4.197 | 703.965 | 1.141 | 0 | 0 | 1 | 0 | 3 | 1 | 0 | 1 | 0 | 0 | 2 | 0 | 5.401 |
| 100 | L158 | 4.524 | 750.968 | 1.229 | 0 | 0 | 1 | 0 | 2 | 2 | 0 | 1 | 0 | 0 | 3 | 0 | 5.632 |
| 101 | L159 | 3.906 | 716.145 | 1.265 | 0 | 0 | 1 | 0 | 2 | 2 | 0 | 0 | 0 | 0 | 1 | 0 | 5.408 |
| 102 | L160 | 3.924 | 741.966 | 0.898 | 0 | 0 | 1 | 0 | 3 | 3 | 0 | 0 | 0 | 0 | 1 | 0 | 5.578 |
| 103 | L161 | 3.885 | 109.938 | 0.035 | 0 | 0 | 0 | 0 | 0 | 0 | 0 | 1 | 0 | 0 | 2 | 0 | 2.553 |
| 104 | L162 | 3.523 | 93.176  | 0.032 | 0 | 0 | 0 | 0 | 0 | 0 | 0 | 1 | 0 | 0 | 2 | 0 | 2.88  |
| 105 | L164 | 4.703 | 62.572  | 1.217 | 0 | 0 | 0 | 0 | 3 | 0 | 0 | 0 | 0 | 0 | 0 | 0 | 5.895 |
| 106 | L166 | 3.792 | 49.53   | 1.279 | 0 | 0 | 0 | 0 | 3 | 0 | 0 | 0 | 0 | 0 | 0 | 0 | 4.242 |
| 107 | L167 | 4.701 | 67.103  | 1.2   | 0 | 0 | 0 | 0 | 3 | 0 | 0 | 0 | 0 | 0 | 0 | 0 | 6.44  |
| 108 | L168 | 4.090 | 76.386  | 1.172 | 0 | 0 | 0 | 0 | 3 | 0 | 0 | 0 | 0 | 0 | 0 | 0 | 7.512 |
| 109 | L171 | 4.386 | 66.294  | 1.037 | 0 | 0 | 0 | 0 | 3 | 0 | 0 | 0 | 0 | 0 | 0 | 0 | 5.715 |
| 110 | L172 | 4.700 | 180.275 | 1.16  | 0 | 0 | 0 | 0 | 3 | 0 | 0 | 0 | 0 | 0 | 0 | 0 | 7.544 |
| 111 | L174 | 3.518 | 58.069  | 0.746 | 0 | 0 | 0 | 0 | 1 | 0 | 0 | 0 | 0 | 0 | 0 | 0 | 6.351 |

|     |      |       |         |       |   |   |   |   |   |   |   |   |   |   |   |   |       |
|-----|------|-------|---------|-------|---|---|---|---|---|---|---|---|---|---|---|---|-------|
| 112 | L175 | 3.840 | 77.821  | 1.161 | 0 | 0 | 0 | 0 | 1 | 0 | 0 | 0 | 0 | 0 | 0 | 1 | 6.666 |
| 113 | L176 | 4.719 | 79.167  | 0.834 | 0 | 0 | 0 | 0 | 2 | 0 | 0 | 0 | 0 | 0 | 0 | 0 | 6.457 |
| 114 | L177 | 4.719 | 79.167  | 1.342 | 0 | 0 | 0 | 0 | 2 | 0 | 0 | 0 | 0 | 0 | 0 | 0 | 6.508 |
| 115 | L178 | 4.448 | 74.738  | 0.765 | 0 | 0 | 0 | 0 | 2 | 0 | 0 | 0 | 0 | 0 | 0 | 0 | 6.346 |
| 116 | L185 | 4.529 | 406.03  | 1.113 | 0 | 0 | 3 | 0 | 3 | 1 | 0 | 0 | 0 | 3 | 2 | 0 | 6.139 |
| 117 | L186 | 4.249 | 432.486 | 1.097 | 0 | 0 | 3 | 0 | 2 | 1 | 0 | 0 | 0 | 6 | 2 | 0 | 6.976 |
| 118 | L187 | 4.529 | 406.396 | 1.118 | 0 | 0 | 3 | 0 | 3 | 1 | 0 | 0 | 0 | 3 | 2 | 0 | 6.143 |
| 119 | L188 | 4.537 | 415.378 | 1.092 | 0 | 0 | 3 | 0 | 1 | 1 | 0 | 0 | 0 | 3 | 2 | 0 | 6.425 |
| 120 | L189 | 4.537 | 426.945 | 1.09  | 0 | 0 | 3 | 0 | 1 | 1 | 0 | 0 | 0 | 3 | 2 | 0 | 6.641 |
| 121 | L190 | 4.552 | 431.534 | 1.027 | 0 | 0 | 3 | 0 | 2 | 1 | 0 | 0 | 0 | 3 | 2 | 0 | 6.912 |
| 122 | L191 | 4.258 | 440.162 | 1.047 | 0 | 0 | 3 | 0 | 1 | 1 | 0 | 0 | 0 | 3 | 2 | 0 | 7.138 |
| 123 | L192 | 5.109 | 186.625 | 0.514 | 0 | 0 | 3 | 0 | 1 | 1 | 0 | 0 | 0 | 3 | 2 | 0 | 5.588 |
| 124 | L193 | 4.843 | 186.625 | 0.514 | 0 | 0 | 3 | 0 | 1 | 1 | 0 | 0 | 0 | 3 | 2 | 0 | 5.588 |
| 125 | L194 | 4.232 | 191.164 | 0.519 | 0 | 0 | 3 | 0 | 3 | 1 | 0 | 0 | 0 | 3 | 3 | 0 | 5.869 |
| 126 | L195 | 4.262 | 154.739 | 0.817 | 0 | 0 | 1 | 0 | 3 | 1 | 0 | 0 | 0 | 2 | 0 | 0 | 4.816 |
| 127 | L196 | 4.115 | 55.757  | 1.507 | 0 | 0 | 1 | 0 | 2 | 1 | 0 | 0 | 0 | 2 | 0 | 0 | 4.425 |
| 128 | L197 | 4.226 | 107.909 | 1.116 | 0 | 0 | 0 | 0 | 2 | 0 | 0 | 0 | 0 | 0 | 0 | 0 | 3.001 |
| 129 | L198 | 3.483 | 107.157 | 0.666 | 0 | 0 | 0 | 0 | 2 | 1 | 0 | 0 | 0 | 2 | 0 | 0 | 6.514 |
| 130 | L199 | 3.499 | 113.473 | 0.632 | 0 | 0 | 0 | 0 | 2 | 1 | 0 | 0 | 0 | 2 | 0 | 0 | 7.099 |
| 131 | L200 | 3.514 | 119.723 | 0.652 | 0 | 0 | 0 | 0 | 2 | 1 | 0 | 0 | 0 | 2 | 0 | 0 | 7.677 |
| 132 | L201 | 3.542 | 225.73  | 1.22  | 0 | 0 | 0 | 0 | 2 | 1 | 0 | 0 | 0 | 5 | 0 | 0 | 6.6   |
| 133 | L202 | 3.555 | 237.366 | 1.199 | 0 | 0 | 0 | 0 | 2 | 1 | 0 | 0 | 0 | 5 | 0 | 0 | 7.182 |
| 134 | L203 | 3.568 | 248.958 | 1.217 | 0 | 0 | 0 | 0 | 2 | 1 | 0 | 0 | 0 | 5 | 0 | 0 | 7.761 |
| 135 | L204 | 4.059 | 267.805 | 0.738 | 0 | 0 | 1 | 0 | 1 | 1 | 0 | 0 | 0 | 0 | 0 | 0 | 4.737 |
| 136 | L205 | 4.718 | 279.953 | 0.753 | 0 | 0 | 1 | 0 | 1 | 1 | 0 | 0 | 0 | 0 | 0 | 0 | 4.892 |
| 137 | L206 | 5.060 | 450.988 | 0.628 | 0 | 0 | 1 | 0 | 1 | 1 | 0 | 0 | 0 | 0 | 0 | 0 | 4.528 |
| 138 | L207 | 4.652 | 175.041 | 0.769 | 0 | 0 | 1 | 0 | 1 | 1 | 0 | 0 | 0 | 0 | 0 | 0 | 4.452 |
| 139 | L208 | 5.030 | 262.407 | 1.333 | 0 | 0 | 1 | 0 | 2 | 1 | 0 | 0 | 0 | 0 | 0 | 0 | 4.145 |
| 140 | L209 | 5.053 | 311.634 | 0.953 | 0 | 0 | 1 | 0 | 2 | 1 | 0 | 0 | 0 | 0 | 0 | 0 | 4.572 |



|     |      |       |         |       |   |   |   |   |   |   |   |   |   |   |   |   |       |
|-----|------|-------|---------|-------|---|---|---|---|---|---|---|---|---|---|---|---|-------|
| 141 | L211 | 4.305 | 76.231  | 1.381 | 0 | 0 | 0 | 0 | 3 | 2 | 0 | 0 | 0 | 0 | 0 | 0 | 3.792 |
| 142 | L212 | 5.219 | 182.617 | 1.529 | 0 | 0 | 0 | 0 | 2 | 1 | 1 | 0 | 0 | 0 | 0 | 0 | 2.378 |
| 143 | L213 | 5.517 | 210.135 | 1.385 | 0 | 0 | 0 | 0 | 1 | 1 | 1 | 0 | 0 | 0 | 0 | 0 | 2.27  |
| 144 | L214 | 3.093 | 142.717 | 1.238 | 0 | 0 | 0 | 0 | 1 | 0 | 0 | 0 | 0 | 0 | 2 | 0 | 3.463 |
| 145 | L215 | 3.833 | 340.198 | 1.204 | 0 | 0 | 0 | 0 | 1 | 0 | 0 | 0 | 0 | 0 | 2 | 0 | 5.859 |
| 146 | L216 | 3.002 | 354.102 | 0.974 | 0 | 0 | 0 | 0 | 1 | 0 | 0 | 0 | 0 | 0 | 2 | 0 | 6.1   |
| 147 | L217 | 3.815 | 285.728 | 1.116 | 0 | 0 | 0 | 0 | 0 | 0 | 0 | 0 | 0 | 0 | 2 | 0 | 4.525 |
| 148 | L218 | 3.890 | 298.258 | 0.933 | 0 | 0 | 0 | 0 | 0 | 0 | 0 | 0 | 0 | 0 | 2 | 0 | 4.664 |
| 149 | L219 | 3.138 | 151.456 | 1.306 | 0 | 0 | 0 | 0 | 1 | 0 | 0 | 0 | 0 | 0 | 2 | 0 | 3.604 |
| 150 | L220 | 3.866 | 354.088 | 1.192 | 0 | 0 | 0 | 0 | 1 | 0 | 0 | 0 | 0 | 0 | 2 | 0 | 5.972 |
| 151 | L221 | 3.933 | 367.993 | 0.965 | 0 | 0 | 0 | 0 | 1 | 0 | 0 | 0 | 0 | 0 | 2 | 0 | 6.215 |
| 152 | L222 | 2.946 | 299.029 | 1.112 | 0 | 0 | 0 | 0 | 0 | 0 | 0 | 0 | 0 | 0 | 2 | 0 | 4.685 |
| 153 | L223 | 3.618 | 311.558 | 0.926 | 0 | 0 | 0 | 0 | 0 | 0 | 0 | 0 | 0 | 0 | 2 | 0 | 4.824 |
| 154 | L224 | 3.792 | 151.456 | 1.567 | 0 | 0 | 0 | 0 | 1 | 0 | 0 | 0 | 0 | 0 | 2 | 0 | 3.604 |
| 155 | L225 | 3.905 | 354.088 | 1.308 | 0 | 0 | 0 | 0 | 1 | 0 | 0 | 0 | 0 | 0 | 2 | 0 | 5.972 |
| 156 | L226 | 3.967 | 367.993 | 1.131 | 0 | 0 | 0 | 0 | 1 | 0 | 0 | 0 | 0 | 0 | 2 | 0 | 6.215 |
| 157 | L227 | 3.890 | 299.029 | 1.226 | 0 | 0 | 0 | 0 | 0 | 0 | 0 | 0 | 0 | 0 | 2 | 0 | 4.685 |
| 158 | L228 | 3.954 | 311.558 | 1.076 | 0 | 0 | 0 | 0 | 0 | 0 | 0 | 0 | 0 | 0 | 2 | 0 | 4.824 |
| 159 | L229 | 4.483 | 56.336  | 1.378 | 0 | 0 | 0 | 0 | 1 | 0 | 0 | 0 | 0 | 0 | 1 | 0 | 1.473 |
| 160 | L230 | 3.889 | 406.023 | 1.203 | 0 | 0 | 0 | 0 | 3 | 1 | 0 | 0 | 0 | 0 | 0 | 0 | 7.246 |
| 161 | L231 | 3.953 | 420.152 | 1.366 | 0 | 0 | 0 | 0 | 3 | 1 | 0 | 0 | 0 | 0 | 0 | 0 | 7.369 |
| 162 | L232 | 4.195 | 413.757 | 1.398 | 0 | 0 | 0 | 0 | 3 | 1 | 0 | 0 | 0 | 0 | 0 | 0 | 7.049 |
| 163 | L233 | 4.259 | 427.886 | 1.296 | 0 | 0 | 0 | 0 | 3 | 1 | 0 | 0 | 0 | 0 | 0 | 0 | 7.19  |
| 164 | L234 | 4.174 | 330.649 | 1.101 | 0 | 0 | 0 | 0 | 1 | 0 | 0 | 0 | 0 | 0 | 0 | 0 | 4.91  |
| 165 | L235 | 4.240 | 343.795 | 1.228 | 0 | 0 | 0 | 0 | 1 | 0 | 0 | 0 | 0 | 0 | 0 | 0 | 5.064 |
| 166 | L236 | 4.179 | 336.059 | 1.14  | 0 | 0 | 0 | 0 | 1 | 0 | 0 | 0 | 0 | 0 | 0 | 0 | 4.645 |
| 167 | L237 | 4.245 | 349.205 | 1.034 | 0 | 0 | 0 | 0 | 1 | 0 | 0 | 0 | 0 | 0 | 0 | 0 | 4.82  |
| 168 | L238 | 4.174 | 362.733 | 0.565 | 0 | 0 | 0 | 0 | 1 | 0 | 0 | 0 | 0 | 0 | 2 | 0 | 5.935 |
| 169 | L239 | 4.240 | 376.535 | 1.264 | 0 | 0 | 0 | 0 | 1 | 0 | 0 | 0 | 0 | 0 | 2 | 0 | 6.066 |

|     |      |       |         |       |   |   |   |   |    |   |   |   |   |   |   |   |        |
|-----|------|-------|---------|-------|---|---|---|---|----|---|---|---|---|---|---|---|--------|
| 170 | L240 | 4.179 | 369.692 | 0.773 | 0 | 0 | 0 | 0 | 1  | 0 | 0 | 0 | 0 | 0 | 2 | 0 | 5.689  |
| 171 | L241 | 4.245 | 383.494 | 1.199 | 0 | 0 | 0 | 0 | 1  | 0 | 0 | 0 | 0 | 0 | 2 | 0 | 5.841  |
| 172 | L242 | 3.755 | 547.623 | 0.964 | 0 | 0 | 1 | 0 | 2  | 1 | 0 | 0 | 0 | 4 | 0 | 0 | 7.935  |
| 173 | L268 | 4.044 | 213.872 | 0.784 | 0 | 0 | 0 | 0 | 6  | 0 | 0 | 0 | 0 | 0 | 0 | 0 | 8.098  |
| 174 | L269 | 4.801 | 306.104 | 0.572 | 0 | 0 | 0 | 0 | 10 | 2 | 0 | 0 | 0 | 0 | 0 | 0 | 10.882 |
| 175 | L270 | 3.835 | 0       | 1.207 | 0 | 0 | 0 | 0 | 8  | 1 | 0 | 0 | 0 | 0 | 0 | 2 | 8.574  |
| 176 | L271 | 4.150 | 0       | 1.264 | 0 | 0 | 0 | 0 | 8  | 1 | 0 | 0 | 0 | 0 | 0 | 2 | 9.075  |
| 177 | L272 | 4.150 | 0       | 1.264 | 0 | 0 | 0 | 0 | 8  | 1 | 0 | 0 | 0 | 0 | 0 | 2 | 8.987  |
| 178 | L274 | 3.821 | 0       | 1.209 | 0 | 0 | 0 | 0 | 8  | 1 | 0 | 0 | 0 | 0 | 0 | 2 | 8.137  |
| 179 | L275 | 3.204 | 0       | 1.268 | 0 | 0 | 0 | 0 | 8  | 1 | 0 | 0 | 0 | 0 | 0 | 2 | 7.458  |
| 180 | L276 | 3.204 | 0       | 1.212 | 0 | 0 | 0 | 0 | 8  | 1 | 0 | 0 | 0 | 0 | 0 | 2 | 7.419  |
| 181 | L277 | 3.176 | 0       | 1.219 | 0 | 0 | 0 | 0 | 8  | 1 | 0 | 0 | 0 | 0 | 0 | 2 | 6.511  |
| 182 | L278 | 3.187 | 0       | 1.215 | 0 | 0 | 0 | 0 | 8  | 1 | 0 | 0 | 0 | 0 | 0 | 2 | 6.985  |
| 183 | L279 | 3.219 | 0       | 1.321 | 0 | 0 | 0 | 0 | 8  | 1 | 0 | 0 | 0 | 0 | 0 | 2 | 7.897  |
| 184 | L280 | 3.398 | 51.312  | 1.178 | 0 | 0 | 0 | 1 | 4  | 0 | 0 | 0 | 0 | 2 | 1 | 0 | 4.534  |
| 185 | L281 | 4.602 | 64.642  | 1.098 | 0 | 0 | 0 | 1 | 4  | 0 | 0 | 0 | 0 | 2 | 1 | 0 | 6.099  |
| 186 | L282 | 4.600 | 73.924  | 1.06  | 0 | 0 | 0 | 1 | 4  | 0 | 0 | 0 | 0 | 2 | 1 | 0 | 7.145  |
| 187 | L283 | 3.398 | 103.107 | 0.983 | 0 | 0 | 0 | 1 | 4  | 0 | 0 | 0 | 0 | 2 | 1 | 0 | 10.186 |
| 188 | L284 | 4.605 | 151.176 | 0.883 | 0 | 0 | 0 | 1 | 4  | 0 | 0 | 0 | 0 | 0 | 1 | 0 | 4.839  |
| 189 | L285 | 4.302 | 141.889 | 0.931 | 0 | 0 | 0 | 1 | 4  | 0 | 0 | 0 | 0 | 0 | 1 | 0 | 4.526  |
| 190 | L286 | 4.302 | 51.312  | 1.178 | 0 | 0 | 0 | 1 | 4  | 0 | 0 | 0 | 0 | 2 | 1 | 0 | 4.534  |
| 191 | L287 | 4.302 | 170.301 | 0.871 | 0 | 0 | 0 | 1 | 4  | 0 | 0 | 0 | 0 | 0 | 1 | 0 | 5.596  |
| 192 | L288 | 3.998 | 140.921 | 0.975 | 0 | 0 | 0 | 1 | 4  | 0 | 0 | 0 | 0 | 0 | 1 | 0 | 4.357  |
| 193 | L289 | 3.399 | 238.501 | 0.913 | 0 | 0 | 0 | 1 | 4  | 0 | 0 | 0 | 0 | 0 | 1 | 0 | 4.707  |
| 194 | L296 | 6.113 | 142.555 | 1.424 | 0 | 0 | 0 | 0 | 3  | 1 | 1 | 2 | 0 | 1 | 1 | 0 | 3.079  |
| 195 | L305 | 4.566 | 155.512 | 0.463 | 0 | 0 | 0 | 0 | 2  | 0 | 0 | 0 | 0 | 0 | 0 | 0 | 5.396  |
| 196 | L311 | 4.288 | 166.142 | 0.854 | 0 | 0 | 0 | 0 | 3  | 0 | 0 | 0 | 0 | 0 | 0 | 0 | 5.563  |
| 197 | L312 | 3.209 | 44.591  | 1.431 | 0 | 0 | 0 | 0 | 2  | 1 | 0 | 0 | 0 | 0 | 0 | 0 | 2.068  |
| 198 | L313 | 2.937 | 48.458  | 1.311 | 0 | 0 | 0 | 0 | 2  | 1 | 0 | 0 | 0 | 0 | 0 | 0 | 2.247  |

|     |      |       |         |       |   |   |   |   |   |   |   |   |   |   |   |   |       |
|-----|------|-------|---------|-------|---|---|---|---|---|---|---|---|---|---|---|---|-------|
| 199 | L315 | 4.142 | 210.846 | 1.023 | 0 | 0 | 1 | 0 | 1 | 0 | 0 | 0 | 0 | 0 | 0 | 0 | 2.192 |
| 200 | L320 | 4.881 | 39.61   | 0.198 | 0 | 0 | 0 | 0 | 3 | 0 | 0 | 0 | 0 | 0 | 0 | 0 | 2.468 |
| 201 | L321 | 4.981 | 35.743  | 0.171 | 0 | 0 | 0 | 0 | 3 | 0 | 0 | 0 | 0 | 0 | 0 | 0 | 2.425 |
| 202 | L322 | 4.904 | 44.91   | 1.119 | 0 | 0 | 0 | 0 | 3 | 0 | 0 | 0 | 0 | 0 | 0 | 0 | 2.839 |
| 203 | L323 | 4.529 | 58.329  | 0.113 | 0 | 0 | 0 | 0 | 3 | 0 | 0 | 1 | 0 | 3 | 1 | 0 | 3.229 |
| 204 | L324 | 4.629 | 141.282 | 0.699 | 0 | 0 | 0 | 0 | 3 | 1 | 0 | 0 | 0 | 1 | 0 | 0 | 2.348 |
| 205 | L325 | 4.629 | 132.316 | 1.677 | 0 | 0 | 0 | 0 | 2 | 2 | 0 | 0 | 0 | 0 | 0 | 0 | 1.096 |
| 206 | L326 | 5.181 | 194.277 | 1.165 | 0 | 0 | 1 | 0 | 1 | 0 | 0 | 0 | 0 | 1 | 0 | 0 | 3.985 |
| 207 | L329 | 4.898 | 0       | 0.36  | 0 | 0 | 0 | 0 | 5 | 0 | 0 | 0 | 0 | 0 | 0 | 0 | 2.225 |
| 208 | L330 | 4.237 | 30.514  | 0     | 1 | 0 | 0 | 0 | 1 | 0 | 0 | 0 | 0 | 0 | 1 | 0 | 1.686 |
| 209 | L331 | 4.884 | 34.943  | 1.239 | 0 | 0 | 0 | 0 | 4 | 1 | 0 | 0 | 0 | 0 | 0 | 0 | 2.041 |
| 210 | L333 | 4.582 | 88.45   | 1.029 | 0 | 0 | 0 | 0 | 2 | 0 | 0 | 0 | 0 | 2 | 0 | 0 | 6.496 |
| 211 | L334 | 4.577 | 165.599 | 0.917 | 0 | 0 | 0 | 0 | 5 | 2 | 0 | 0 | 0 | 0 | 0 | 0 | 2.559 |
| 212 | L335 | 5.131 | 147.779 | 0.8   | 0 | 0 | 0 | 0 | 3 | 0 | 0 | 0 | 0 | 0 | 0 | 0 | 2.547 |
| 213 | L336 | 4.529 | 147.133 | 0.985 | 0 | 0 | 0 | 0 | 3 | 0 | 1 | 0 | 0 | 0 | 0 | 0 | 2.52  |
| 214 | L337 | 5.463 | 625.259 | 0.868 | 0 | 0 | 3 | 0 | 8 | 5 | 0 | 0 | 0 | 2 | 0 | 0 | 5.083 |
| 215 | L338 | 4.930 | 38.248  | 0     | 1 | 0 | 0 | 0 | 4 | 2 | 0 | 0 | 0 | 0 | 0 | 0 | 1.623 |
| 216 | L339 | 4.780 | 461.434 | 0.915 | 0 | 0 | 0 | 0 | 5 | 2 | 0 | 0 | 0 | 0 | 0 | 0 | 4.105 |
| 217 | L340 | 4.780 | 461.434 | 0.915 | 0 | 0 | 0 | 0 | 5 | 2 | 0 | 0 | 0 | 0 | 0 | 0 | 4.105 |
| 218 | L344 | 4.527 | 441.818 | 0.592 | 0 | 0 | 0 | 0 | 4 | 1 | 0 | 0 | 0 | 3 | 0 | 0 | 3.984 |
| 219 | L345 | 3.604 | 250.551 | 0.889 | 0 | 0 | 0 | 0 | 1 | 0 | 0 | 0 | 0 | 2 | 0 | 0 | 4.325 |
| 220 | L353 | 4.831 | 282.146 | 1.074 | 0 | 1 | 0 | 0 | 7 | 4 | 0 | 0 | 0 | 0 | 0 | 0 | 2.822 |
| 221 | L354 | 5.433 | 282.146 | 1.074 | 0 | 1 | 0 | 0 | 7 | 4 | 0 | 0 | 0 | 0 | 0 | 0 | 2.822 |
| 222 | L355 | 5.445 | 292.393 | 1.137 | 0 | 1 | 0 | 0 | 7 | 4 | 0 | 0 | 0 | 0 | 0 | 0 | 2.919 |
| 223 | L358 | 4.900 | 354.021 | 0.814 | 0 | 1 | 0 | 0 | 8 | 5 | 0 | 0 | 0 | 0 | 0 | 0 | 3.905 |
| 224 | L362 | 4.842 | 292.671 | 1.08  | 0 | 1 | 0 | 0 | 7 | 4 | 0 | 0 | 0 | 0 | 0 | 0 | 2.885 |
| 225 | L363 | 4.563 | 313.976 | 1.108 | 0 | 1 | 0 | 0 | 7 | 4 | 0 | 0 | 0 | 0 | 0 | 0 | 3.076 |
| 226 | L364 | 5.784 | 317.407 | 1.28  | 0 | 1 | 0 | 0 | 7 | 4 | 0 | 0 | 0 | 0 | 0 | 0 | 2.821 |
| 227 | L365 | 5.794 | 328.041 | 1.276 | 0 | 1 | 0 | 0 | 7 | 4 | 0 | 0 | 0 | 0 | 0 | 0 | 2.861 |

|     |      |       |         |       |   |   |   |   |   |   |   |   |   |   |   |   |       |
|-----|------|-------|---------|-------|---|---|---|---|---|---|---|---|---|---|---|---|-------|
| 228 | L366 | 5.511 | 386.895 | 1.252 | 0 | 1 | 0 | 0 | 7 | 4 | 0 | 0 | 0 | 0 | 0 | 0 | 2.959 |
| 229 | L368 | 4.853 | 332.538 | 1.198 | 0 | 1 | 0 | 0 | 7 | 4 | 0 | 0 | 0 | 1 | 0 | 0 | 3.86  |
| 230 | L369 | 5.387 | 506.892 | 0.565 | 0 | 0 | 1 | 0 | 2 | 1 | 0 | 2 | 0 | 0 | 4 | 0 | 6.425 |
| 231 | L371 | 4.764 | 510.762 | 1.016 | 0 | 0 | 1 | 0 | 4 | 1 | 0 | 2 | 0 | 0 | 3 | 0 | 6.658 |
| 232 | L372 | 5.968 | 510.896 | 0.968 | 0 | 0 | 1 | 0 | 4 | 0 | 0 | 2 | 0 | 0 | 3 | 0 | 6.602 |
| 233 | L373 | 6.286 | 525.458 | 1     | 0 | 0 | 1 | 0 | 4 | 0 | 0 | 2 | 0 | 0 | 3 | 0 | 6.603 |
| 234 | L374 | 6.269 | 510.896 | 0.968 | 0 | 0 | 1 | 0 | 4 | 0 | 0 | 2 | 0 | 0 | 3 | 0 | 6.602 |
| 235 | L375 | 6.587 | 525.458 | 1     | 0 | 0 | 1 | 0 | 4 | 0 | 0 | 2 | 0 | 0 | 3 | 0 | 6.603 |
| 236 | L377 | 5.683 | 525.458 | 0.987 | 0 | 0 | 1 | 0 | 4 | 0 | 0 | 2 | 0 | 0 | 2 | 0 | 6.603 |
| 237 | L379 | 5.972 | 506.892 | 0.971 | 0 | 0 | 1 | 0 | 2 | 1 | 0 | 2 | 0 | 0 | 2 | 0 | 6.425 |
| 238 | L380 | 5.986 | 506.892 | 0.521 | 0 | 0 | 1 | 0 | 2 | 1 | 0 | 2 | 0 | 0 | 2 | 0 | 6.425 |
| 239 | L384 | 5.080 | 525.457 | 0.989 | 0 | 0 | 1 | 0 | 4 | 1 | 0 | 1 | 0 | 0 | 2 | 0 | 6.603 |
| 240 | L385 | 5.380 | 525.457 | 0.995 | 0 | 0 | 1 | 0 | 4 | 1 | 0 | 1 | 0 | 0 | 1 | 0 | 6.603 |
| 241 | L386 | 5.381 | 525.457 | 1.008 | 0 | 0 | 1 | 0 | 4 | 1 | 0 | 1 | 0 | 0 | 1 | 0 | 6.603 |
| 242 | L389 | 4.442 | 45.91   | 0.856 | 0 | 0 | 0 | 0 | 2 | 0 | 0 | 0 | 0 | 0 | 0 | 0 | 2.252 |
| 243 | L391 | 4.414 | 41.697  | 1.031 | 0 | 0 | 0 | 0 | 2 | 0 | 0 | 0 | 0 | 0 | 0 | 0 | 2.154 |
| 244 | L392 | 4.469 | 50.123  | 0.745 | 0 | 0 | 0 | 0 | 2 | 0 | 0 | 0 | 0 | 0 | 0 | 0 | 2.348 |
| 245 | L398 | 4.469 | 50.123  | 0.745 | 0 | 0 | 0 | 0 | 2 | 0 | 0 | 0 | 0 | 0 | 0 | 0 | 2.291 |
| 246 | L399 | 3.892 | 54.337  | 0.668 | 0 | 0 | 0 | 0 | 2 | 0 | 0 | 0 | 0 | 0 | 0 | 0 | 2.339 |
| 247 | L403 | 4.168 | 50.289  | 1.483 | 0 | 0 | 0 | 0 | 2 | 0 | 0 | 0 | 0 | 0 | 0 | 0 | 2.447 |
| 248 | L405 | 3.892 | 54.502  | 1.329 | 0 | 0 | 0 | 0 | 2 | 0 | 0 | 0 | 0 | 0 | 0 | 0 | 2.412 |
| 249 | L407 | 3.916 | 58.88   | 1.708 | 0 | 0 | 0 | 0 | 2 | 0 | 0 | 0 | 0 | 0 | 0 | 0 | 2.44  |
| 250 | L408 | 3.539 | 46.28   | 1.704 | 0 | 0 | 0 | 0 | 2 | 0 | 0 | 0 | 0 | 0 | 0 | 0 | 2.517 |
| 251 | L410 | 3.601 | 111.773 | 1.828 | 0 | 0 | 0 | 0 | 2 | 0 | 0 | 0 | 0 | 0 | 0 | 0 | 2.87  |
| 252 | L412 | 4.465 | 47.066  | 0.745 | 0 | 0 | 0 | 0 | 2 | 0 | 0 | 0 | 0 | 0 | 0 | 0 | 2.291 |
| 253 | L413 | 4.490 | 99.575  | 1.329 | 0 | 0 | 0 | 0 | 2 | 0 | 0 | 0 | 0 | 0 | 0 | 0 | 2.365 |
| 254 | L414 | 3.290 | 56.64   | 1.246 | 0 | 0 | 0 | 0 | 2 | 0 | 0 | 0 | 0 | 0 | 0 | 0 | 2.99  |
| 255 | L416 | 3.567 | 50.123  | 0.765 | 0 | 0 | 0 | 0 | 2 | 0 | 0 | 1 | 0 | 0 | 1 | 0 | 2.291 |
| 256 | L417 | 5.130 | 53.99   | 1.063 | 0 | 0 | 0 | 0 | 2 | 0 | 0 | 0 | 0 | 0 | 0 | 0 | 2.466 |

|     |      |       |         |       |   |   |   |   |    |   |   |   |   |   |   |   |       |
|-----|------|-------|---------|-------|---|---|---|---|----|---|---|---|---|---|---|---|-------|
| 257 | L418 | 4.895 | 53.99   | 1.278 | 0 | 0 | 0 | 0 | 2  | 0 | 0 | 0 | 0 | 0 | 0 | 0 | 2.466 |
| 258 | L419 | 4.655 | 53.99   | 1.303 | 0 | 0 | 0 | 0 | 2  | 0 | 0 | 0 | 0 | 0 | 0 | 0 | 2.466 |
| 259 | L420 | 4.802 | 53.99   | 0.741 | 0 | 0 | 0 | 0 | 2  | 0 | 0 | 0 | 0 | 0 | 0 | 0 | 2.466 |
| 260 | L421 | 3.899 | 53.99   | 0.777 | 0 | 0 | 0 | 0 | 2  | 1 | 0 | 0 | 0 | 0 | 0 | 0 | 2.35  |
| 261 | L422 | 4.501 | 53.99   | 0.932 | 0 | 0 | 0 | 0 | 2  | 0 | 0 | 0 | 0 | 0 | 0 | 0 | 2.434 |
| 262 | L423 | 3.324 | 53.99   | 1.13  | 0 | 0 | 0 | 0 | 2  | 0 | 0 | 0 | 0 | 0 | 0 | 0 | 2.35  |
| 263 | L424 | 4.528 | 53.99   | 0.995 | 0 | 0 | 0 | 0 | 2  | 0 | 0 | 0 | 0 | 0 | 0 | 0 | 2.434 |
| 264 | L425 | 3.954 | 57.857  | 0.954 | 0 | 0 | 0 | 0 | 2  | 0 | 0 | 0 | 0 | 0 | 0 | 0 | 2.553 |
| 265 | L432 | 5.082 | 45.564  | 1.375 | 0 | 0 | 0 | 0 | 2  | 0 | 0 | 0 | 0 | 0 | 0 | 0 | 2.316 |
| 266 | L437 | 3.904 | 252.108 | 0.863 | 0 | 0 | 0 | 0 | 8  | 2 | 0 | 0 | 0 | 0 | 0 | 0 | 8.523 |
| 267 | L438 | 4.354 | 0       | 0     | 0 | 0 | 0 | 0 | 1  | 0 | 0 | 0 | 0 | 0 | 0 | 0 | 0.944 |
| 268 | L439 | 4.078 | 54.963  | 0.863 | 0 | 0 | 0 | 0 | 0  | 0 | 0 | 0 | 0 | 0 | 0 | 0 | 3.403 |
| 269 | L440 | 4.176 | 58.829  | 0.777 | 0 | 0 | 0 | 0 | 0  | 0 | 0 | 0 | 0 | 0 | 0 | 0 | 3.562 |
| 270 | L441 | 4.257 | 58.829  | 0.617 | 0 | 0 | 0 | 0 | 0  | 0 | 0 | 0 | 0 | 0 | 0 | 0 | 3.562 |
| 271 | L442 | 4.352 | 63.02   | 0.95  | 0 | 0 | 0 | 0 | 0  | 0 | 0 | 0 | 0 | 0 | 0 | 0 | 3.566 |
| 272 | L443 | 4.352 | 58.829  | 0.087 | 0 | 0 | 0 | 0 | 0  | 0 | 0 | 0 | 0 | 0 | 0 | 0 | 3.538 |
| 273 | L444 | 4.530 | 0       | 0     | 0 | 0 | 0 | 0 | 2  | 1 | 0 | 0 | 0 | 0 | 0 | 0 | 1.045 |
| 274 | L445 | 4.530 | 0       | 1     | 0 | 0 | 0 | 0 | 2  | 1 | 0 | 0 | 0 | 1 | 0 | 0 | 2.101 |
| 275 | L446 | 5.376 | 347.287 | 0.923 | 0 | 0 | 4 | 0 | 11 | 3 | 0 | 0 | 0 | 0 | 0 | 0 | 4.22  |
| 276 | L447 | 5.980 | 347.287 | 0.923 | 0 | 0 | 4 | 0 | 11 | 4 | 0 | 0 | 0 | 0 | 0 | 0 | 4.22  |
| 277 | L448 | 5.697 | 168.463 | 1.14  | 0 | 0 | 0 | 0 | 2  | 0 | 0 | 1 | 1 | 0 | 2 | 0 | 3.642 |
| 278 | L449 | 5.220 | 168.346 | 1.353 | 0 | 0 | 0 | 0 | 2  | 0 | 0 | 1 | 1 | 0 | 2 | 0 | 3.638 |
| 279 | L450 | 5.691 | 179.497 | 1.275 | 0 | 0 | 0 | 0 | 2  | 0 | 0 | 1 | 1 | 0 | 2 | 0 | 3.668 |
| 280 | L451 | 5.691 | 168.463 | 1.118 | 0 | 0 | 0 | 0 | 2  | 0 | 0 | 1 | 1 | 0 | 2 | 0 | 3.642 |
| 281 | L452 | 5.667 | 168.463 | 0.975 | 0 | 0 | 0 | 0 | 2  | 0 | 0 | 1 | 1 | 0 | 2 | 0 | 3.642 |
| 282 | L453 | 5.235 | 168.346 | 1.5   | 0 | 0 | 0 | 0 | 2  | 0 | 0 | 1 | 1 | 0 | 2 | 0 | 3.638 |
| 283 | L454 | 4.926 | 168.346 | 1.39  | 0 | 0 | 0 | 0 | 2  | 0 | 0 | 1 | 1 | 0 | 2 | 0 | 3.638 |
| 284 | L456 | 5.396 | 162.172 | 0.981 | 0 | 0 | 0 | 0 | 2  | 0 | 0 | 1 | 1 | 0 | 2 | 0 | 3.461 |
| 285 | L457 | 5.691 | 162.172 | 0.965 | 0 | 0 | 0 | 0 | 2  | 0 | 0 | 1 | 1 | 0 | 2 | 0 | 3.461 |

|     |      |       |         |       |   |   |   |   |   |   |   |   |   |   |   |   |       |
|-----|------|-------|---------|-------|---|---|---|---|---|---|---|---|---|---|---|---|-------|
| 286 | L458 | 5.214 | 162.172 | 0.702 | 0 | 0 | 0 | 0 | 2 | 0 | 0 | 1 | 1 | 0 | 2 | 0 | 3.461 |
| 287 | L459 | 5.214 | 172.42  | 1.056 | 0 | 0 | 0 | 0 | 2 | 0 | 0 | 1 | 1 | 0 | 2 | 0 | 3.46  |
| 288 | L460 | 5.396 | 162.33  | 1.173 | 0 | 0 | 0 | 0 | 2 | 0 | 0 | 1 | 1 | 0 | 2 | 0 | 3.47  |
| 289 | L461 | 5.389 | 162.33  | 1.304 | 0 | 0 | 0 | 0 | 2 | 0 | 0 | 1 | 1 | 0 | 2 | 0 | 3.47  |
| 290 | L462 | 4.926 | 162.33  | 1.074 | 0 | 0 | 0 | 0 | 2 | 0 | 0 | 1 | 1 | 0 | 2 | 0 | 3.47  |
| 291 | L463 | 4.926 | 174.094 | 1.272 | 0 | 0 | 0 | 0 | 2 | 0 | 0 | 1 | 1 | 0 | 2 | 0 | 4.311 |
| 292 | L464 | 5.717 | 184.508 | 1.196 | 0 | 0 | 0 | 0 | 2 | 0 | 0 | 1 | 1 | 0 | 2 | 0 | 4.306 |
| 293 | L465 | 5.410 | 195.632 | 1.399 | 0 | 0 | 0 | 0 | 2 | 0 | 0 | 1 | 1 | 0 | 2 | 0 | 4.322 |
| 294 | L466 | 5.708 | 184.508 | 1.171 | 0 | 0 | 0 | 0 | 2 | 0 | 0 | 1 | 1 | 0 | 2 | 0 | 4.306 |
| 295 | L467 | 5.688 | 184.508 | 1.182 | 0 | 0 | 0 | 0 | 2 | 0 | 0 | 1 | 1 | 0 | 2 | 0 | 4.306 |
| 296 | L468 | 6.572 | 259.735 | 1.129 | 0 | 0 | 0 | 0 | 4 | 2 | 1 | 2 | 0 | 0 | 1 | 0 | 3.231 |
| 297 | L469 | 5.685 | 179.497 | 1.313 | 0 | 0 | 0 | 0 | 2 | 0 | 0 | 1 | 1 | 0 | 2 | 0 | 3.668 |
| 298 | L470 | 5.688 | 179.497 | 1.313 | 0 | 0 | 0 | 0 | 2 | 0 | 0 | 1 | 1 | 0 | 2 | 0 | 3.668 |
| 299 | L471 | 5.705 | 190.531 | 1.598 | 0 | 0 | 0 | 0 | 2 | 0 | 0 | 1 | 1 | 0 | 2 | 0 | 3.703 |
| 300 | L472 | 4.600 | 190.531 | 1.598 | 0 | 0 | 0 | 0 | 2 | 0 | 0 | 1 | 1 | 0 | 2 | 0 | 3.703 |
| 301 | L473 | 5.677 | 215.803 | 1.148 | 0 | 0 | 0 | 0 | 2 | 0 | 0 | 1 | 1 | 0 | 2 | 0 | 4.061 |
| 302 | L474 | 5.679 | 215.803 | 1.148 | 0 | 0 | 0 | 0 | 2 | 0 | 0 | 1 | 1 | 0 | 2 | 0 | 4.061 |
| 303 | L475 | 5.674 | 206.31  | 1.478 | 0 | 0 | 0 | 0 | 2 | 0 | 0 | 1 | 1 | 0 | 2 | 0 | 3.832 |
| 304 | L476 | 5.692 | 297.345 | 1.43  | 0 | 0 | 0 | 0 | 2 | 0 | 0 | 1 | 1 | 0 | 2 | 0 | 3.914 |
| 305 | L477 | 5.695 | 297.345 | 1.43  | 0 | 0 | 0 | 0 | 2 | 0 | 0 | 1 | 1 | 0 | 2 | 0 | 3.914 |
| 306 | L478 | 5.001 | 297.345 | 1.43  | 0 | 0 | 0 | 0 | 2 | 0 | 0 | 1 | 1 | 0 | 2 | 0 | 3.914 |
| 307 | L480 | 4.776 | 397.711 | 0.665 | 0 | 0 | 0 | 0 | 3 | 0 | 0 | 0 | 0 | 0 | 0 | 0 | 5.181 |
| 308 | L481 | 3.905 | 367.903 | 1.684 | 0 | 0 | 0 | 0 | 1 | 0 | 0 | 0 | 0 | 1 | 0 | 0 | 3.296 |
| 309 | L483 | 3.630 | 393.025 | 1.689 | 0 | 0 | 0 | 0 | 1 | 0 | 0 | 0 | 0 | 1 | 0 | 0 | 3.846 |
| 310 | L484 | 3.934 | 380.201 | 0.987 | 0 | 0 | 0 | 0 | 1 | 0 | 0 | 0 | 0 | 1 | 0 | 0 | 3.567 |
| 311 | L486 | 4.729 | 421.699 | 1.16  | 0 | 0 | 0 | 0 | 2 | 1 | 0 | 0 | 0 | 0 | 0 | 0 | 3.69  |
| 312 | L487 | 5.073 | 477.062 | 1.17  | 0 | 0 | 0 | 0 | 2 | 1 | 0 | 0 | 0 | 0 | 0 | 0 | 4.582 |
| 313 | L488 | 4.858 | 149.672 | 0.89  | 0 | 0 | 0 | 0 | 2 | 1 | 0 | 0 | 0 | 0 | 0 | 0 | 3.967 |
| 314 | L489 | 4.921 | 177.213 | 0.701 | 0 | 0 | 0 | 0 | 2 | 1 | 0 | 0 | 0 | 0 | 0 | 0 | 4.69  |



|     |      |       |         |       |   |   |   |   |   |   |   |   |   |   |   |   |       |
|-----|------|-------|---------|-------|---|---|---|---|---|---|---|---|---|---|---|---|-------|
| 315 | L490 | 5.184 | 161.203 | 0.673 | 0 | 0 | 0 | 0 | 4 | 1 | 0 | 0 | 0 | 0 | 0 | 0 | 4.636 |
| 316 | L491 | 3.713 | 98.826  | 1.35  | 0 | 0 | 0 | 0 | 1 | 1 | 0 | 0 | 0 | 0 | 0 | 0 | 6.931 |
| 317 | L492 | 3.672 | 90.769  | 1.544 | 0 | 0 | 0 | 0 | 1 | 0 | 0 | 0 | 0 | 0 | 0 | 0 | 6.714 |
| 318 | L493 | 4.728 | 0       | 0     | 0 | 0 | 0 | 0 | 1 | 0 | 0 | 0 | 0 | 2 | 0 | 0 | 1.437 |
| 319 | L494 | 4.501 | 0       | 0     | 0 | 0 | 0 | 0 | 1 | 0 | 0 | 0 | 0 | 0 | 0 | 0 | 1.344 |
| 320 | L498 | 4.371 | 160.015 | 1.004 | 0 | 0 | 0 | 0 | 2 | 2 | 0 | 0 | 0 | 0 | 0 | 0 | 2.23  |
| 321 | L499 | 4.667 | 136.154 | 1.637 | 0 | 0 | 0 | 0 | 1 | 0 | 1 | 0 | 0 | 0 | 2 | 0 | 3.206 |
| 322 | L500 | 4.397 | 151.708 | 1.614 | 0 | 0 | 0 | 0 | 1 | 0 | 1 | 0 | 0 | 0 | 2 | 0 | 3.774 |
| 323 | L501 | 4.427 | 167.777 | 1.539 | 0 | 0 | 0 | 0 | 1 | 0 | 1 | 0 | 0 | 0 | 2 | 0 | 4.282 |
| 324 | L502 | 4.696 | 147.882 | 1.614 | 0 | 0 | 0 | 0 | 1 | 0 | 1 | 0 | 0 | 0 | 2 | 0 | 3.774 |
| 325 | L503 | 4.711 | 254.68  | 1.592 | 0 | 0 | 0 | 0 | 1 | 0 | 1 | 0 | 0 | 0 | 2 | 0 | 4.037 |
| 326 | L504 | 4.412 | 254.68  | 1.521 | 0 | 0 | 1 | 0 | 1 | 0 | 1 | 0 | 0 | 0 | 2 | 0 | 4.037 |
| 327 | L505 | 4.110 | 254.68  | 1.592 | 0 | 0 | 0 | 0 | 2 | 0 | 1 | 0 | 0 | 0 | 2 | 0 | 4.037 |
| 328 | L506 | 4.382 | 144.225 | 1.615 | 0 | 0 | 0 | 0 | 2 | 0 | 1 | 0 | 0 | 0 | 2 | 0 | 3.6   |
| 329 | L507 | 4.079 | 143.192 | 1.615 | 0 | 0 | 0 | 0 | 2 | 0 | 1 | 0 | 0 | 0 | 2 | 0 | 3.6   |
| 330 | L508 | 4.410 | 156.578 | 1.571 | 0 | 0 | 0 | 0 | 2 | 0 | 1 | 0 | 0 | 0 | 2 | 0 | 4.259 |
| 331 | L509 | 4.726 | 271.47  | 1.573 | 0 | 0 | 0 | 0 | 2 | 0 | 1 | 0 | 0 | 0 | 2 | 0 | 4.56  |
| 332 | L510 | 4.439 | 169.167 | 1.575 | 0 | 0 | 0 | 0 | 2 | 0 | 1 | 0 | 0 | 0 | 2 | 0 | 4.839 |
| 333 | L511 | 5.623 | 271.47  | 1.573 | 0 | 0 | 0 | 0 | 2 | 0 | 1 | 0 | 0 | 0 | 2 | 0 | 4.56  |
| 334 | L512 | 5.340 | 283.801 | 1.27  | 0 | 0 | 0 | 0 | 2 | 0 | 1 | 0 | 0 | 0 | 2 | 0 | 4.85  |
| 335 | L513 | 5.958 | 283.801 | 0.564 | 0 | 0 | 0 | 0 | 2 | 0 | 1 | 0 | 0 | 0 | 2 | 0 | 4.85  |
| 336 | L514 | 4.750 | 296.637 | 1.512 | 0 | 0 | 0 | 0 | 2 | 0 | 1 | 0 | 0 | 0 | 2 | 0 | 5.141 |
| 337 | L515 | 4.734 | 283.801 | 1.575 | 0 | 0 | 0 | 0 | 2 | 0 | 1 | 0 | 0 | 0 | 2 | 0 | 4.85  |
| 338 | L516 | 4.734 | 288.136 | 1.58  | 0 | 0 | 0 | 0 | 2 | 0 | 1 | 0 | 0 | 0 | 2 | 0 | 5.107 |
| 339 | L517 | 4.752 | 300.648 | 1.21  | 0 | 0 | 0 | 0 | 2 | 0 | 1 | 0 | 0 | 0 | 2 | 0 | 5.425 |
| 340 | L518 | 3.885 | 158.99  | 0.417 | 0 | 0 | 0 | 0 | 5 | 1 | 0 | 0 | 0 | 2 | 0 | 0 | 3.058 |
| 341 | L519 | 4.212 | 185.127 | 0.877 | 0 | 0 | 0 | 0 | 5 | 1 | 0 | 0 | 0 | 2 | 0 | 0 | 3.82  |
| 342 | L520 | 4.215 | 170.087 | 0.424 | 0 | 0 | 0 | 0 | 3 | 1 | 0 | 0 | 0 | 2 | 0 | 0 | 3.538 |
| 343 | L521 | 3.896 | 170.087 | 0.744 | 0 | 0 | 0 | 0 | 3 | 1 | 0 | 0 | 0 | 2 | 0 | 0 | 3.538 |

|     |      |       |         |       |   |   |   |   |   |   |   |   |   |   |   |   |       |
|-----|------|-------|---------|-------|---|---|---|---|---|---|---|---|---|---|---|---|-------|
| 344 | L522 | 6.293 | 327.163 | 1.095 | 0 | 1 | 0 | 0 | 6 | 3 | 0 | 0 | 0 | 0 | 0 | 0 | 2.228 |
| 345 | L523 | 4.800 | 341.264 | 1.09  | 0 | 1 | 0 | 0 | 6 | 3 | 0 | 0 | 0 | 0 | 0 | 0 | 2.322 |
| 346 | L524 | 5.420 | 351.557 | 1.096 | 0 | 1 | 0 | 0 | 6 | 3 | 0 | 0 | 0 | 0 | 0 | 0 | 2.4   |
| 347 | L525 | 4.764 | 272.85  | 1.144 | 0 | 1 | 0 | 0 | 6 | 3 | 0 | 0 | 0 | 0 | 0 | 0 | 2.482 |
| 348 | L526 | 5.439 | 352.22  | 1.086 | 0 | 1 | 0 | 0 | 7 | 3 | 0 | 0 | 0 | 0 | 0 | 0 | 3.53  |
| 349 | L527 | 6.028 | 336.637 | 1.096 | 0 | 1 | 0 | 0 | 7 | 3 | 0 | 0 | 0 | 0 | 0 | 0 | 3.301 |
| 350 | L543 | 3.657 | 87.51   | 1.537 | 0 | 0 | 0 | 0 | 3 | 1 | 0 | 0 | 0 | 0 | 3 | 0 | 3.576 |
| 351 | L544 | 3.856 | 401.627 | 0.909 | 0 | 0 | 0 | 0 | 1 | 0 | 0 | 0 | 0 | 4 | 0 | 0 | 7.489 |
| 352 | L545 | 3.856 | 401.627 | 0.909 | 0 | 0 | 0 | 0 | 1 | 0 | 0 | 0 | 0 | 4 | 0 | 0 | 7.489 |
| 353 | L546 | 4.064 | 102.989 | 0.652 | 0 | 0 | 0 | 0 | 2 | 2 | 0 | 1 | 0 | 0 | 1 | 0 | 3.469 |
| 354 | L547 | 3.805 | 120.83  | 0.918 | 0 | 0 | 0 | 0 | 3 | 2 | 0 | 1 | 0 | 2 | 1 | 0 | 4.284 |
| 355 | L548 | 4.158 | 381.441 | 0.393 | 0 | 0 | 0 | 0 | 4 | 1 | 0 | 0 | 0 | 2 | 0 | 0 | 5.344 |
| 356 | L549 | 3.857 | 381.441 | 0.393 | 0 | 0 | 0 | 0 | 4 | 0 | 0 | 0 | 0 | 2 | 0 | 0 | 5.344 |
| 357 | L550 | 3.765 | 58.186  | 1.3   | 0 | 0 | 0 | 0 | 4 | 0 | 0 | 0 | 0 | 0 | 1 | 0 | 2.131 |
| 358 | L551 | 3.440 | 28.346  | 1.238 | 0 | 0 | 0 | 0 | 5 | 0 | 0 | 0 | 0 | 0 | 2 | 0 | 2.308 |
| 359 | L555 | 4.779 | 525.457 | 1.072 | 0 | 0 | 1 | 0 | 3 | 0 | 0 | 0 | 0 | 0 | 1 | 0 | 6.603 |
| 360 | L556 | 5.727 | 334.46  | 1.096 | 0 | 1 | 0 | 0 | 6 | 3 | 0 | 0 | 0 | 0 | 0 | 0 | 3.245 |
| 361 | L557 | 6.043 | 342.352 | 1.07  | 0 | 1 | 0 | 0 | 6 | 3 | 0 | 0 | 0 | 0 | 0 | 0 | 3.189 |
| 362 | L558 | 5.453 | 342.352 | 0.897 | 0 | 1 | 0 | 0 | 6 | 3 | 0 | 0 | 0 | 0 | 0 | 0 | 3.189 |
| 363 | L559 | 5.751 | 351.318 | 1.126 | 0 | 1 | 0 | 0 | 6 | 3 | 0 | 0 | 0 | 0 | 0 | 0 | 3.14  |
| 364 | L560 | 5.772 | 372.085 | 1.046 | 0 | 1 | 0 | 0 | 6 | 3 | 0 | 0 | 0 | 0 | 0 | 0 | 3.068 |
| 365 | L561 | 5.471 | 371.198 | 1.035 | 0 | 1 | 0 | 0 | 6 | 3 | 0 | 0 | 0 | 0 | 0 | 0 | 3.063 |
| 366 | L562 | 5.182 | 383.722 | 1.093 | 0 | 1 | 1 | 0 | 6 | 3 | 0 | 0 | 0 | 0 | 0 | 0 | 3.056 |
| 367 | L567 | 5.771 | 372.085 | 1.051 | 0 | 1 | 0 | 0 | 7 | 3 | 0 | 0 | 0 | 0 | 0 | 0 | 3.068 |
| 368 | L568 | 4.597 | 401.817 | 1.014 | 0 | 1 | 0 | 0 | 6 | 3 | 0 | 0 | 0 | 0 | 0 | 0 | 2.991 |
| 369 | L569 | 4.890 | 395.359 | 1.065 | 0 | 1 | 0 | 0 | 6 | 3 | 0 | 0 | 0 | 0 | 0 | 0 | 3.069 |
| 370 | L574 | 5.103 | 310.146 | 1.119 | 0 | 1 | 0 | 0 | 7 | 3 | 0 | 0 | 0 | 0 | 0 | 0 | 2.875 |
| 371 | L575 | 5.729 | 338.877 | 1.096 | 0 | 1 | 0 | 0 | 7 | 3 | 0 | 0 | 0 | 0 | 0 | 0 | 3.333 |
| 372 | L576 | 6.041 | 353.583 | 1.086 | 0 | 1 | 0 | 0 | 7 | 3 | 0 | 0 | 0 | 0 | 0 | 0 | 3.608 |

|     |      |       |         |       |   |   |   |   |   |   |   |   |   |   |   |   |       |
|-----|------|-------|---------|-------|---|---|---|---|---|---|---|---|---|---|---|---|-------|
| 373 | L577 | 5.742 | 354.209 | 1.09  | 0 | 1 | 1 | 0 | 7 | 3 | 0 | 0 | 0 | 0 | 0 | 0 | 3.641 |
| 374 | L578 | 5.416 | 323.425 | 1.107 | 0 | 1 | 0 | 0 | 6 | 3 | 0 | 0 | 0 | 0 | 0 | 0 | 3.049 |
| 375 | L579 | 5.428 | 337.45  | 1.096 | 0 | 1 | 0 | 0 | 6 | 3 | 0 | 0 | 0 | 0 | 0 | 0 | 3.255 |
| 376 | L581 | 5.739 | 345.772 | 1.086 | 0 | 1 | 0 | 0 | 6 | 3 | 0 | 0 | 0 | 0 | 0 | 0 | 3.452 |
| 377 | L582 | 5.749 | 473.185 | 1.077 | 0 | 1 | 0 | 0 | 6 | 3 | 0 | 0 | 0 | 0 | 0 | 0 | 3.663 |
| 378 | L583 | 5.138 | 349.166 | 1.075 | 0 | 1 | 0 | 0 | 7 | 4 | 0 | 0 | 0 | 0 | 0 | 0 | 3.46  |
| 379 | L584 | 5.450 | 364.498 | 1.079 | 0 | 1 | 1 | 0 | 6 | 3 | 0 | 0 | 0 | 0 | 0 | 0 | 3.7   |
| 380 | L585 | 5.159 | 379.83  | 1.111 | 0 | 1 | 0 | 0 | 6 | 3 | 0 | 0 | 0 | 0 | 0 | 0 | 3.944 |
| 381 | L586 | 4.567 | 396.315 | 1.062 | 0 | 1 | 0 | 0 | 7 | 3 | 0 | 0 | 0 | 3 | 0 | 0 | 4.245 |
| 382 | L587 | 4.844 | 364.498 | 1.095 | 0 | 1 | 0 | 0 | 6 | 3 | 0 | 0 | 0 | 1 | 0 | 0 | 3.7   |
| 383 | L588 | 5.742 | 349.166 | 0.986 | 0 | 1 | 0 | 0 | 6 | 3 | 0 | 0 | 0 | 0 | 0 | 0 | 3.46  |
| 384 | L591 | 5.732 | 332.063 | 1.08  | 0 | 1 | 0 | 0 | 7 | 3 | 0 | 0 | 0 | 0 | 0 | 0 | 3.034 |
| 385 | L592 | 6.344 | 344.528 | 1.07  | 0 | 1 | 0 | 0 | 7 | 3 | 0 | 0 | 0 | 0 | 0 | 0 | 3.242 |
| 386 | L593 | 6.356 | 360.112 | 1.06  | 0 | 1 | 0 | 0 | 7 | 3 | 0 | 0 | 0 | 0 | 0 | 0 | 3.458 |
| 387 | L594 | 6.033 | 331.317 | 1.08  | 0 | 1 | 0 | 0 | 6 | 3 | 0 | 0 | 0 | 0 | 0 | 0 | 3.007 |
| 388 | L595 | 5.756 | 357.058 | 0.998 | 0 | 1 | 0 | 0 | 6 | 3 | 0 | 0 | 0 | 0 | 0 | 0 | 3.392 |
| 389 | L596 | 6.365 | 483.003 | 1.052 | 0 | 1 | 0 | 0 | 6 | 3 | 0 | 0 | 0 | 0 | 0 | 0 | 3.586 |
| 390 | L597 | 5.753 | 355.735 | 1.126 | 0 | 1 | 0 | 0 | 7 | 3 | 0 | 0 | 0 | 0 | 0 | 0 | 3.216 |
| 391 | L598 | 6.353 | 353.495 | 1.126 | 0 | 1 | 0 | 0 | 7 | 3 | 0 | 0 | 0 | 0 | 0 | 0 | 3.188 |
| 392 | L599 | 6.365 | 370.441 | 1.117 | 0 | 1 | 0 | 0 | 7 | 3 | 0 | 0 | 0 | 0 | 0 | 0 | 3.462 |
| 393 | L600 | 5.462 | 369.078 | 1.117 | 0 | 1 | 0 | 0 | 7 | 3 | 0 | 0 | 0 | 0 | 0 | 0 | 3.392 |
| 394 | L601 | 5.742 | 340.283 | 1.136 | 0 | 1 | 0 | 0 | 6 | 3 | 0 | 0 | 0 | 0 | 0 | 0 | 2.972 |
| 395 | L602 | 6.367 | 366.024 | 1.012 | 0 | 1 | 0 | 0 | 6 | 3 | 0 | 0 | 0 | 0 | 0 | 0 | 3.33  |
| 396 | L603 | 5.762 | 362.63  | 1.117 | 0 | 1 | 0 | 0 | 6 | 3 | 0 | 0 | 0 | 0 | 0 | 0 | 3.322 |
| 397 | L604 | 5.440 | 335.97  | 1.178 | 0 | 1 | 0 | 0 | 7 | 3 | 0 | 0 | 0 | 0 | 0 | 0 | 2.815 |
| 398 | L605 | 5.473 | 380.033 | 1.143 | 0 | 1 | 1 | 0 | 7 | 3 | 0 | 0 | 0 | 0 | 0 | 0 | 3.425 |
| 399 | L606 | 4.548 | 349.249 | 1.17  | 0 | 1 | 0 | 0 | 6 | 3 | 0 | 0 | 0 | 0 | 0 | 0 | 2.942 |
| 400 | L607 | 4.567 | 371.596 | 1.154 | 0 | 1 | 0 | 0 | 6 | 3 | 0 | 0 | 0 | 0 | 0 | 0 | 3.264 |
| 401 | L608 | 5.081 | 284.407 | 1.027 | 0 | 1 | 0 | 0 | 6 | 3 | 0 | 0 | 0 | 0 | 0 | 0 | 2.588 |

|     |      |       |         |       |   |   |   |   |   |   |   |   |   |   |   |   |       |
|-----|------|-------|---------|-------|---|---|---|---|---|---|---|---|---|---|---|---|-------|
| 402 | L610 | 5.710 | 301.264 | 1.034 | 0 | 1 | 0 | 0 | 6 | 3 | 0 | 0 | 0 | 0 | 0 | 0 | 2.605 |
| 403 | L611 | 4.517 | 310.231 | 1.087 | 0 | 1 | 0 | 0 | 6 | 3 | 0 | 0 | 0 | 0 | 0 | 0 | 2.625 |
| 404 | L612 | 5.125 | 328.746 | 1.052 | 0 | 1 | 0 | 0 | 7 | 3 | 0 | 0 | 0 | 0 | 0 | 0 | 3.178 |
| 405 | L613 | 4.513 | 316.857 | 1.076 | 0 | 1 | 0 | 0 | 6 | 3 | 0 | 0 | 0 | 0 | 0 | 0 | 2.956 |
| 406 | L615 | 4.778 | 282.694 | 1.151 | 0 | 1 | 0 | 0 | 8 | 3 | 0 | 0 | 0 | 0 | 0 | 0 | 2.569 |
| 407 | L617 | 4.501 | 304.304 | 1.181 | 0 | 1 | 0 | 0 | 6 | 3 | 0 | 0 | 0 | 0 | 0 | 0 | 2.784 |
| 408 | L621 | 2.959 | 187.03  | 1.261 | 0 | 0 | 0 | 1 | 0 | 0 | 0 | 0 | 0 | 3 | 1 | 0 | 4.498 |
| 409 | L622 | 2.955 | 187.746 | 1.392 | 0 | 0 | 0 | 1 | 1 | 0 | 0 | 0 | 0 | 3 | 1 | 0 | 4.494 |
| 410 | L624 | 2.943 | 215.641 | 0.899 | 0 | 0 | 0 | 1 | 1 | 0 | 0 | 0 | 0 | 3 | 1 | 0 | 4.597 |
| 411 | L626 | 2.959 | 316.191 | 0.879 | 0 | 0 | 0 | 1 | 1 | 0 | 0 | 0 | 0 | 3 | 1 | 0 | 4.643 |
| 412 | L628 | 2.959 | 316.191 | 0.922 | 0 | 0 | 1 | 1 | 1 | 0 | 0 | 0 | 0 | 3 | 1 | 0 | 4.643 |
| 413 | L630 | 3.260 | 316.191 | 0.912 | 0 | 0 | 0 | 1 | 2 | 0 | 0 | 0 | 0 | 3 | 1 | 0 | 4.643 |
| 414 | L632 | 3.585 | 344.643 | 0.89  | 0 | 0 | 0 | 1 | 1 | 0 | 0 | 0 | 0 | 3 | 1 | 0 | 4.778 |
| 415 | L634 | 3.602 | 375.827 | 0.889 | 0 | 0 | 0 | 1 | 1 | 0 | 0 | 0 | 0 | 3 | 1 | 0 | 5.013 |
| 416 | L636 | 3.328 | 408.996 | 0.89  | 0 | 0 | 0 | 1 | 1 | 0 | 0 | 0 | 0 | 3 | 1 | 0 | 5.4   |
| 417 | L642 | 4.292 | 516.572 | 0.891 | 0 | 0 | 0 | 1 | 1 | 0 | 0 | 0 | 0 | 3 | 1 | 0 | 7.6   |
| 418 | L644 | 3.301 | 359.95  | 0.815 | 0 | 0 | 0 | 1 | 2 | 0 | 0 | 0 | 0 | 3 | 1 | 0 | 4.879 |
| 419 | L646 | 2.996 | 359.95  | 0.907 | 0 | 0 | 0 | 1 | 1 | 0 | 0 | 0 | 0 | 3 | 1 | 0 | 4.879 |
| 420 | L648 | 2.991 | 359.95  | 0.907 | 0 | 0 | 0 | 1 | 1 | 0 | 0 | 0 | 0 | 3 | 1 | 0 | 4.879 |
| 421 | L650 | 2.991 | 359.95  | 0.884 | 0 | 0 | 0 | 1 | 1 | 0 | 0 | 0 | 0 | 3 | 1 | 0 | 4.879 |
| 422 | L652 | 5.038 | 227.224 | 1.562 | 0 | 0 | 0 | 0 | 1 | 0 | 1 | 0 | 0 | 0 | 0 | 0 | 2.536 |
| 423 | L666 | 3.337 | 93.411  | 1.036 | 0 | 0 | 0 | 0 | 3 | 2 | 0 | 0 | 0 | 2 | 0 | 0 | 2.341 |
| 424 | L667 | 3.033 | 93.411  | 1.036 | 0 | 0 | 0 | 0 | 2 | 1 | 0 | 0 | 0 | 0 | 0 | 0 | 2.341 |
| 425 | L668 | 3.537 | 47.105  | 1.379 | 0 | 0 | 0 | 0 | 3 | 0 | 0 | 0 | 0 | 0 | 0 | 0 | 2.083 |
| 426 | L673 | 3.835 | 389.431 | 0.829 | 0 | 0 | 1 | 0 | 4 | 2 | 0 | 0 | 0 | 0 | 0 | 0 | 6.81  |
| 427 | L674 | 4.036 | 183.244 | 1.037 | 0 | 0 | 0 | 0 | 2 | 2 | 0 | 0 | 0 | 0 | 0 | 0 | 4.548 |
| 428 | L677 | 4.033 | 0       | 1.273 | 0 | 0 | 0 | 0 | 0 | 0 | 0 | 0 | 0 | 5 | 0 | 0 | 4.679 |
| 429 | L678 | 3.932 | 0       | 1.143 | 0 | 0 | 0 | 0 | 1 | 0 | 0 | 0 | 0 | 0 | 0 | 0 | 5.07  |
| 430 | L679 | 3.654 | 344.671 | 0.923 | 0 | 0 | 0 | 0 | 3 | 0 | 0 | 0 | 0 | 0 | 1 | 0 | 8.848 |

|     |      |       |         |       |   |   |   |   |   |   |   |   |   |   |   |   |       |
|-----|------|-------|---------|-------|---|---|---|---|---|---|---|---|---|---|---|---|-------|
| 431 | L681 | 4.256 | 345.574 | 0.904 | 0 | 0 | 0 | 0 | 3 | 0 | 0 | 0 | 0 | 0 | 1 | 0 | 8.856 |
| 432 | L683 | 4.271 | 344.671 | 0.827 | 0 | 0 | 0 | 0 | 3 | 0 | 0 | 0 | 0 | 0 | 1 | 0 | 8.848 |
| 433 | L685 | 4.572 | 345.574 | 0.547 | 0 | 0 | 0 | 0 | 3 | 0 | 0 | 0 | 0 | 0 | 1 | 0 | 8.856 |
| 434 | L687 | 4.302 | 383.209 | 0.796 | 0 | 0 | 0 | 0 | 3 | 0 | 0 | 0 | 0 | 0 | 1 | 0 | 9.544 |
| 435 | L689 | 4.302 | 386.72  | 0.576 | 0 | 0 | 0 | 0 | 3 | 0 | 0 | 0 | 0 | 0 | 1 | 0 | 9.578 |
| 436 | L691 | 6.291 | 131.457 | 1.641 | 0 | 0 | 0 | 0 | 3 | 0 | 1 | 0 | 0 | 0 | 0 | 0 | 2.609 |
| 437 | L692 | 5.999 | 125.869 | 1.573 | 0 | 0 | 0 | 0 | 3 | 0 | 1 | 0 | 0 | 0 | 0 | 0 | 2.464 |
| 438 | L694 | 6.307 | 201.575 | 1.51  | 0 | 0 | 0 | 0 | 2 | 0 | 1 | 0 | 0 | 0 | 0 | 0 | 2.797 |
| 439 | L695 | 6.266 | 140.552 | 1.474 | 0 | 0 | 0 | 0 | 3 | 0 | 1 | 0 | 0 | 0 | 0 | 0 | 2.964 |
| 440 | L696 | 3.472 | 0       | 0.525 | 0 | 0 | 0 | 0 | 1 | 0 | 0 | 0 | 0 | 0 | 0 | 0 | 6.873 |
| 441 | L697 | 3.630 | 221.611 | 0.674 | 0 | 0 | 0 | 0 | 1 | 0 | 0 | 0 | 0 | 0 | 0 | 0 | 2.212 |
| 442 | L698 | 3.329 | 223.217 | 0.66  | 0 | 0 | 0 | 0 | 1 | 0 | 0 | 0 | 0 | 0 | 0 | 0 | 2.246 |
| 443 | L699 | 3.317 | 167.372 | 0.769 | 0 | 0 | 0 | 0 | 1 | 0 | 0 | 0 | 0 | 0 | 0 | 0 | 4.08  |
| 444 | L700 | 3.673 | 196.364 | 0.716 | 0 | 0 | 0 | 0 | 0 | 0 | 0 | 0 | 0 | 3 | 0 | 0 | 4.132 |
| 445 | L702 | 4.507 | 509.969 | 1.671 | 0 | 0 | 0 | 0 | 2 | 1 | 0 | 0 | 0 | 2 | 0 | 0 | 3.517 |
| 446 | L703 | 4.133 | 451.398 | 0.699 | 0 | 0 | 0 | 0 | 0 | 0 | 0 | 0 | 0 | 2 | 0 | 0 | 3.943 |
| 447 | L704 | 4.222 | 519.152 | 1.243 | 0 | 0 | 0 | 0 | 0 | 0 | 0 | 0 | 0 | 2 | 0 | 0 | 3.52  |
| 448 | L705 | 4.355 | 264.316 | 0.86  | 0 | 0 | 0 | 0 | 1 | 0 | 0 | 0 | 0 | 2 | 0 | 0 | 4.739 |
| 449 | L706 | 4.256 | 126.16  | 0.735 | 1 | 0 | 0 | 0 | 2 | 1 | 0 | 0 | 0 | 2 | 0 | 0 | 3.366 |
| 450 | L707 | 3.532 | 161.844 | 1.474 | 0 | 0 | 0 | 0 | 1 | 1 | 0 | 0 | 0 | 0 | 1 | 0 | 3.331 |
| 451 | L708 | 3.740 | 87.007  | 1.577 | 0 | 0 | 0 | 0 | 1 | 1 | 0 | 0 | 0 | 0 | 2 | 0 | 2.539 |
| 452 | L709 | 3.542 | 144.168 | 1.169 | 0 | 0 | 0 | 0 | 0 | 0 | 0 | 0 | 0 | 0 | 1 | 0 | 2.286 |
| 453 | L710 | 3.516 | 186.368 | 1.536 | 0 | 0 | 0 | 0 | 2 | 1 | 0 | 0 | 0 | 0 | 0 | 0 | 3.542 |
| 454 | L712 | 3.465 | 144.168 | 1.175 | 0 | 0 | 0 | 0 | 1 | 0 | 0 | 0 | 0 | 0 | 0 | 0 | 2.286 |
| 455 | L713 | 3.468 | 101.97  | 1.358 | 0 | 0 | 0 | 0 | 2 | 1 | 0 | 0 | 0 | 0 | 0 | 0 | 3.797 |
| 456 | L714 | 3.401 | 77.655  | 1.373 | 0 | 0 | 0 | 0 | 2 | 1 | 0 | 0 | 0 | 0 | 0 | 0 | 2.129 |
| 457 | L715 | 3.480 | 160.762 | 1.51  | 0 | 0 | 0 | 0 | 1 | 1 | 0 | 0 | 0 | 0 | 0 | 0 | 3.007 |
| 458 | L716 | 3.459 | 95.851  | 1.454 | 0 | 0 | 0 | 0 | 1 | 1 | 0 | 0 | 0 | 0 | 0 | 0 | 3.194 |
| 459 | L718 | 3.424 | 85.472  | 1.457 | 0 | 0 | 0 | 0 | 2 | 1 | 0 | 0 | 0 | 0 | 0 | 0 | 2.667 |

|     |      |       |         |       |   |   |   |   |   |   |   |   |   |   |   |   |       |
|-----|------|-------|---------|-------|---|---|---|---|---|---|---|---|---|---|---|---|-------|
| 460 | L721 | 3.454 | 148.777 | 1.555 | 0 | 0 | 0 | 0 | 1 | 1 | 0 | 0 | 0 | 0 | 1 | 0 | 2.777 |
| 461 | L722 | 3.413 | 78.317  | 0.792 | 0 | 0 | 0 | 1 | 0 | 0 | 0 | 0 | 0 | 0 | 1 | 0 | 1.89  |
| 462 | L724 | 3.539 | 104.851 | 1.258 | 0 | 0 | 0 | 1 | 2 | 1 | 0 | 0 | 0 | 2 | 1 | 0 | 3.84  |
| 463 | L726 | 3.544 | 110.577 | 1.328 | 0 | 0 | 0 | 0 | 1 | 1 | 0 | 0 | 0 | 0 | 0 | 0 | 4.371 |
| 464 | L727 | 3.489 | 85.472  | 1.405 | 0 | 0 | 0 | 0 | 1 | 1 | 0 | 0 | 0 | 0 | 0 | 0 | 2.667 |
| 465 | L728 | 3.527 | 101.97  | 1.35  | 0 | 0 | 0 | 0 | 1 | 1 | 0 | 0 | 0 | 0 | 0 | 0 | 3.797 |
| 466 | L729 | 3.546 | 110.349 | 1.338 | 0 | 0 | 0 | 0 | 2 | 1 | 0 | 0 | 0 | 5 | 0 | 0 | 4.277 |
| 467 | L730 | 3.489 | 84.281  | 0.707 | 0 | 0 | 0 | 0 | 1 | 1 | 0 | 0 | 0 | 0 | 0 | 0 | 2.19  |
| 468 | L731 | 3.489 | 83.777  | 0.764 | 0 | 0 | 0 | 0 | 0 | 0 | 0 | 0 | 0 | 0 | 0 | 0 | 1.89  |
| 469 | L732 | 4.601 | 95.544  | 1.251 | 0 | 0 | 0 | 0 | 4 | 0 | 0 | 0 | 0 | 0 | 0 | 0 | 7.18  |
| 470 | L733 | 4.036 | 106.353 | 1.227 | 0 | 0 | 0 | 0 | 4 | 0 | 0 | 0 | 0 | 0 | 0 | 0 | 8.178 |
| 471 | L734 | 4.303 | 95.544  | 1.251 | 0 | 0 | 0 | 0 | 4 | 0 | 0 | 0 | 0 | 0 | 0 | 0 | 7.18  |
| 472 | L735 | 3.784 | 120.475 | 1.161 | 0 | 0 | 0 | 0 | 3 | 0 | 0 | 0 | 0 | 3 | 0 | 0 | 7.765 |
| 473 | L736 | 3.754 | 109.666 | 1.163 | 0 | 0 | 0 | 0 | 3 | 0 | 0 | 0 | 0 | 3 | 0 | 0 | 6.68  |
| 474 | L737 | 3.752 | 109.666 | 1.163 | 0 | 0 | 0 | 0 | 3 | 0 | 0 | 0 | 0 | 3 | 0 | 0 | 6.68  |
| 475 | L738 | 3.815 | 131.391 | 1.16  | 0 | 0 | 0 | 0 | 3 | 0 | 0 | 0 | 0 | 3 | 0 | 0 | 8.837 |
| 476 | L739 | 3.977 | 91.677  | 1.685 | 0 | 0 | 0 | 0 | 3 | 0 | 0 | 0 | 0 | 0 | 0 | 0 | 7.069 |
| 477 | L740 | 3.735 | 105.8   | 1.393 | 0 | 0 | 0 | 0 | 2 | 0 | 0 | 0 | 0 | 3 | 0 | 0 | 6.65  |
| 478 | L741 | 3.732 | 105.8   | 1.393 | 0 | 0 | 0 | 0 | 2 | 0 | 0 | 0 | 0 | 3 | 0 | 0 | 6.65  |
| 479 | L742 | 3.899 | 195.107 | 0.915 | 0 | 0 | 0 | 0 | 2 | 1 | 0 | 0 | 0 | 0 | 0 | 0 | 1.995 |
| 480 | L747 | 4.077 | 161.708 | 0.802 | 0 | 0 | 0 | 0 | 0 | 0 | 0 | 0 | 0 | 0 | 0 | 0 | 4.552 |
| 481 | L753 | 3.412 | 140.238 | 0.713 | 0 | 0 | 0 | 0 | 3 | 0 | 0 | 0 | 0 | 0 | 0 | 0 | 2.645 |
| 482 | L760 | 4.002 | 261.892 | 1.226 | 0 | 0 | 0 | 0 | 3 | 1 | 0 | 0 | 0 | 0 | 0 | 0 | 2.465 |
| 483 | L761 | 3.796 | 138.477 | 1.163 | 0 | 0 | 0 | 0 | 3 | 1 | 0 | 0 | 0 | 0 | 0 | 0 | 2.628 |
| 484 | L762 | 3.990 | 93.102  | 1.009 | 0 | 0 | 0 | 0 | 3 | 1 | 0 | 0 | 0 | 0 | 0 | 0 | 1.603 |
| 485 | L763 | 4.017 | 99.614  | 1.096 | 0 | 0 | 0 | 0 | 4 | 3 | 0 | 0 | 0 | 0 | 0 | 0 | 1.636 |
| 486 | L764 | 5.344 | 785.333 | 1.103 | 0 | 0 | 0 | 0 | 9 | 3 | 0 | 0 | 0 | 0 | 0 | 0 | 9.005 |
| 487 | L765 | 5.304 | 694.174 | 1.239 | 0 | 0 | 0 | 0 | 8 | 1 | 0 | 0 | 0 | 2 | 2 | 0 | 8.477 |
| 488 | L766 | 5.304 | 686.837 | 1.208 | 0 | 0 | 0 | 0 | 8 | 1 | 0 | 0 | 0 | 2 | 2 | 0 | 8.436 |

|     |      |       |          |       |   |   |   |   |    |   |   |   |   |   |   |   |       |
|-----|------|-------|----------|-------|---|---|---|---|----|---|---|---|---|---|---|---|-------|
| 489 | L767 | 5.312 | 711.274  | 1.232 | 0 | 0 | 0 | 0 | 8  | 1 | 0 | 0 | 0 | 2 | 2 | 0 | 8.646 |
| 490 | L768 | 5.017 | 962.13   | 1.252 | 0 | 0 | 0 | 0 | 8  | 1 | 0 | 0 | 0 | 2 | 2 | 0 | 8.742 |
| 491 | L769 | 5.004 | 676.968  | 0.674 | 0 | 0 | 0 | 0 | 8  | 1 | 0 | 1 | 0 | 0 | 2 | 0 | 8.315 |
| 492 | L770 | 5.007 | 935.338  | 1.23  | 0 | 0 | 0 | 0 | 8  | 1 | 0 | 0 | 0 | 0 | 2 | 0 | 8.564 |
| 493 | L771 | 5.308 | 901.408  | 1.211 | 0 | 0 | 0 | 0 | 8  | 1 | 0 | 0 | 0 | 0 | 2 | 0 | 8.513 |
| 494 | L772 | 5.021 | 988.667  | 1.259 | 0 | 0 | 0 | 0 | 8  | 1 | 0 | 0 | 0 | 2 | 2 | 0 | 8.942 |
| 495 | L773 | 5.327 | 745.414  | 1.135 | 0 | 0 | 1 | 0 | 8  | 1 | 0 | 0 | 0 | 0 | 2 | 0 | 9.021 |
| 496 | L774 | 5.029 | 1015.035 | 1.141 | 0 | 0 | 1 | 0 | 8  | 1 | 0 | 0 | 0 | 0 | 2 | 0 | 9.163 |
| 497 | L775 | 5.346 | 1256.719 | 1.167 | 0 | 0 | 0 | 0 | 8  | 1 | 0 | 0 | 0 | 0 | 2 | 0 | 8.962 |
| 498 | L776 | 5.069 | 952.21   | 0.792 | 0 | 0 | 0 | 0 | 8  | 1 | 0 | 0 | 0 | 0 | 2 | 0 | 8.63  |
| 499 | L777 | 3.758 | 114.094  | 1.05  | 0 | 0 | 0 | 0 | 3  | 1 | 0 | 0 | 0 | 0 | 0 | 0 | 1.689 |
| 500 | L778 | 4.338 | 105.488  | 1.064 | 0 | 0 | 0 | 0 | 4  | 1 | 0 | 0 | 0 | 0 | 0 | 0 | 1.542 |
| 501 | L779 | 4.071 | 478.258  | 1.007 | 0 | 0 | 0 | 0 | 9  | 5 | 0 | 0 | 0 | 0 | 0 | 0 | 3.402 |
| 502 | L780 | 4.035 | 435.848  | 0.972 | 0 | 0 | 0 | 0 | 8  | 2 | 0 | 0 | 0 | 0 | 0 | 0 | 3.235 |
| 503 | L781 | 4.059 | 465.311  | 0.993 | 0 | 0 | 0 | 0 | 8  | 4 | 0 | 0 | 0 | 0 | 0 | 0 | 3.36  |
| 504 | L782 | 4.046 | 452.364  | 0.98  | 0 | 0 | 0 | 0 | 7  | 2 | 0 | 0 | 0 | 0 | 0 | 0 | 3.313 |
| 505 | L785 | 4.302 | 44.111   | 1.074 | 0 | 0 | 1 | 0 | 1  | 0 | 0 | 0 | 0 | 0 | 0 | 0 | 1.649 |
| 506 | L787 | 4.841 | 245.174  | 1.014 | 0 | 0 | 0 | 0 | 5  | 2 | 0 | 0 | 0 | 0 | 1 | 0 | 5.351 |
| 507 | L791 | 2.699 | 0        | 1.494 | 0 | 0 | 0 | 0 | 1  | 0 | 0 | 1 | 0 | 3 | 2 | 0 | 4.243 |
| 508 | L793 | 2.699 | 56.913   | 1.723 | 0 | 0 | 0 | 1 | 2  | 0 | 0 | 1 | 0 | 3 | 3 | 0 | 4.786 |
| 509 | L798 | 5.231 | 2187.71  | 1.141 | 0 | 0 | 0 | 0 | 16 | 6 | 0 | 0 | 0 | 0 | 0 | 0 | 3.734 |
| 510 | L799 | 4.262 | 420.766  | 0.982 | 0 | 0 | 0 | 0 | 12 | 4 | 0 | 0 | 0 | 0 | 0 | 0 | 3.712 |
| 511 | L800 | 4.704 | 565.688  | 0.962 | 0 | 0 | 0 | 0 | 20 | 7 | 0 | 0 | 0 | 0 | 0 | 0 | 4.697 |
| 512 | L801 | 3.698 | 191.923  | 1.366 | 0 | 0 | 0 | 1 | 5  | 0 | 0 | 0 | 0 | 0 | 1 | 0 | 5.556 |
| 513 | L802 | 4.304 | 171.163  | 0.688 | 0 | 0 | 0 | 1 | 5  | 0 | 0 | 0 | 0 | 0 | 1 | 0 | 4.987 |
| 514 | L803 | 3.700 | 182.079  | 1.431 | 0 | 0 | 0 | 1 | 5  | 0 | 0 | 0 | 0 | 0 | 1 | 0 | 5.293 |
| 515 | L804 | 4.300 | 170.25   | 0.9   | 0 | 0 | 0 | 1 | 5  | 0 | 0 | 0 | 0 | 0 | 1 | 0 | 4.965 |
| 516 | L806 | 3.701 | 171.163  | 1.652 | 0 | 0 | 0 | 1 | 5  | 0 | 0 | 0 | 0 | 0 | 1 | 0 | 4.987 |
| 517 | L807 | 4.004 | 199.158  | 1.31  | 0 | 0 | 0 | 1 | 5  | 0 | 0 | 0 | 0 | 0 | 1 | 0 | 5.518 |

|     |      |       |          |       |   |   |   |   |    |   |   |   |   |   |   |   |        |
|-----|------|-------|----------|-------|---|---|---|---|----|---|---|---|---|---|---|---|--------|
| 518 | L808 | 3.699 | 196.559  | 0.833 | 0 | 0 | 0 | 1 | 5  | 0 | 0 | 0 | 0 | 0 | 1 | 0 | 5.41   |
| 519 | L810 | 4.824 | 217.207  | 1.218 | 0 | 0 | 0 | 1 | 4  | 0 | 0 | 0 | 0 | 0 | 1 | 0 | 5.909  |
| 520 | L811 | 4.301 | 196.447  | 0.617 | 0 | 0 | 0 | 1 | 4  | 0 | 0 | 0 | 0 | 0 | 1 | 0 | 5.328  |
| 521 | L812 | 3.699 | 207.363  | 1.261 | 0 | 0 | 0 | 1 | 4  | 0 | 0 | 0 | 0 | 0 | 1 | 0 | 5.638  |
| 522 | L813 | 3.699 | 195.534  | 0.816 | 0 | 0 | 0 | 1 | 4  | 0 | 0 | 0 | 0 | 0 | 1 | 0 | 5.309  |
| 523 | L814 | 3.699 | 224.381  | 0.824 | 0 | 0 | 0 | 1 | 4  | 0 | 0 | 0 | 0 | 0 | 1 | 0 | 5.863  |
| 524 | L815 | 3.699 | 196.447  | 1.458 | 0 | 0 | 0 | 1 | 4  | 0 | 0 | 0 | 0 | 0 | 1 | 0 | 5.328  |
| 525 | L816 | 3.699 | 224.442  | 1.18  | 0 | 0 | 0 | 1 | 4  | 0 | 0 | 0 | 0 | 0 | 1 | 0 | 5.914  |
| 526 | L817 | 3.699 | 221.843  | 0.741 | 0 | 0 | 0 | 1 | 4  | 0 | 0 | 0 | 0 | 0 | 1 | 0 | 5.823  |
| 527 | L818 | 3.699 | 246.326  | 0.6   | 0 | 0 | 0 | 1 | 4  | 0 | 0 | 0 | 0 | 0 | 1 | 0 | 5.966  |
| 528 | L819 | 3.699 | 223.611  | 0.479 | 0 | 0 | 0 | 1 | 4  | 0 | 0 | 0 | 0 | 0 | 1 | 0 | 5.818  |
| 529 | L820 | 3.699 | 204.452  | 0.505 | 0 | 0 | 0 | 1 | 4  | 0 | 0 | 0 | 0 | 0 | 1 | 0 | 5.47   |
| 530 | L821 | 5.177 | 261.66   | 0.964 | 0 | 0 | 0 | 0 | 23 | 7 | 0 | 0 | 0 | 2 | 0 | 0 | 8.788  |
| 531 | L822 | 5.165 | 0        | 0.933 | 0 | 0 | 0 | 0 | 23 | 7 | 0 | 0 | 0 | 2 | 0 | 0 | 8.89   |
| 532 | L824 | 5.473 | 258.39   | 0.969 | 0 | 0 | 0 | 0 | 23 | 8 | 0 | 0 | 0 | 2 | 0 | 0 | 8.873  |
| 533 | L825 | 5.779 | 871.895  | 0.999 | 0 | 0 | 0 | 0 | 23 | 7 | 0 | 0 | 0 | 0 | 0 | 0 | 9.173  |
| 534 | L826 | 5.789 | 959.82   | 0.985 | 0 | 0 | 0 | 0 | 23 | 7 | 0 | 0 | 0 | 0 | 0 | 0 | 9.683  |
| 535 | L827 | 5.493 | 982.76   | 0.982 | 0 | 0 | 0 | 0 | 24 | 7 | 0 | 0 | 0 | 0 | 0 | 0 | 10.067 |
| 536 | L829 | 6.090 | 993.858  | 0.977 | 0 | 0 | 0 | 0 | 23 | 7 | 0 | 0 | 0 | 0 | 0 | 0 | 9.702  |
| 537 | L830 | 5.795 | 1013.268 | 0.923 | 0 | 0 | 0 | 0 | 23 | 7 | 0 | 1 | 0 | 0 | 1 | 0 | 9.988  |
| 538 | L831 | 6.099 | 1014.933 | 0.972 | 0 | 0 | 0 | 0 | 23 | 7 | 0 | 0 | 0 | 0 | 0 | 0 | 10.099 |
| 539 | L832 | 6.400 | 981.397  | 1.005 | 0 | 0 | 0 | 0 | 23 | 7 | 0 | 0 | 0 | 0 | 0 | 0 | 10.085 |
| 540 | L833 | 5.799 | 981.397  | 0.95  | 0 | 0 | 0 | 0 | 23 | 7 | 0 | 0 | 0 | 0 | 0 | 0 | 10.085 |
| 541 | L834 | 5.498 | 982.726  | 1     | 0 | 0 | 0 | 0 | 23 | 7 | 0 | 0 | 0 | 0 | 0 | 0 | 10.07  |
| 542 | L835 | 5.498 | 984.537  | 1.001 | 0 | 0 | 0 | 0 | 23 | 7 | 0 | 0 | 0 | 0 | 0 | 0 | 10.049 |
| 543 | L836 | 6.102 | 970.27   | 0.741 | 0 | 0 | 0 | 0 | 23 | 8 | 0 | 0 | 0 | 0 | 0 | 0 | 9.885  |
| 544 | L837 | 5.500 | 970.27   | 0.737 | 0 | 0 | 0 | 0 | 23 | 7 | 0 | 0 | 0 | 0 | 1 | 0 | 9.885  |
| 545 | L838 | 5.508 | 995.873  | 0.745 | 0 | 0 | 0 | 0 | 23 | 7 | 0 | 0 | 0 | 0 | 0 | 0 | 10.351 |
| 546 | L839 | 6.090 | 959.82   | 0.989 | 0 | 0 | 0 | 0 | 23 | 7 | 0 | 0 | 0 | 0 | 1 | 0 | 9.683  |



|     |      |       |         |       |   |   |   |   |    |   |   |   |   |   |   |   |        |
|-----|------|-------|---------|-------|---|---|---|---|----|---|---|---|---|---|---|---|--------|
| 547 | L840 | 5.488 | 959.82  | 0.999 | 0 | 0 | 0 | 0 | 23 | 7 | 0 | 0 | 0 | 0 | 1 | 0 | 9.683  |
| 548 | L841 | 5.800 | 985.422 | 0.97  | 0 | 0 | 0 | 0 | 23 | 7 | 0 | 0 | 0 | 0 | 1 | 0 | 10.169 |
| 549 | L842 | 5.499 | 982.726 | 1.005 | 0 | 0 | 0 | 0 | 23 | 7 | 0 | 1 | 0 | 0 | 1 | 0 | 10.07  |
| 550 | L843 | 5.789 | 959.82  | 1.004 | 0 | 0 | 0 | 0 | 23 | 7 | 0 | 0 | 0 | 0 | 2 | 0 | 9.683  |
| 551 | L844 | 6.102 | 969.788 | 0.649 | 0 | 0 | 0 | 0 | 23 | 7 | 0 | 0 | 0 | 0 | 1 | 0 | 9.918  |
| 552 | L845 | 6.403 | 970.952 | 0.649 | 0 | 0 | 0 | 0 | 23 | 7 | 0 | 0 | 0 | 0 | 1 | 0 | 9.924  |
| 553 | L846 | 6.102 | 972.377 | 0.618 | 0 | 0 | 0 | 0 | 23 | 7 | 0 | 0 | 0 | 0 | 1 | 0 | 9.926  |
| 554 | L848 | 4.402 | 422.252 | 0.957 | 0 | 0 | 0 | 0 | 8  | 1 | 0 | 0 | 0 | 0 | 3 | 0 | 8.058  |
| 555 | L865 | 4.703 | 0       | 0.888 | 0 | 0 | 0 | 0 | 4  | 2 | 0 | 0 | 0 | 0 | 1 | 0 | 4.211  |
| 556 | L867 | 4.701 | 0       | 0.888 | 0 | 0 | 0 | 0 | 4  | 2 | 0 | 0 | 0 | 0 | 1 | 0 | 4.211  |
| 557 | L868 | 3.877 | 0       | 0.512 | 0 | 0 | 0 | 0 | 4  | 2 | 0 | 0 | 0 | 0 | 1 | 0 | 4.414  |
| 558 | L884 | 4.320 | 80.865  | 0.655 | 0 | 0 | 0 | 0 | 2  | 0 | 0 | 0 | 0 | 2 | 0 | 0 | 4.128  |
| 559 | L887 | 5.854 | 194.915 | 1.031 | 0 | 0 | 0 | 0 | 9  | 3 | 1 | 0 | 0 | 0 | 1 | 0 | 7.674  |
| 560 | L888 | 4.051 | 0       | 0.888 | 0 | 0 | 0 | 0 | 5  | 2 | 0 | 0 | 0 | 0 | 1 | 0 | 4.184  |
| 561 | L889 | 5.087 | 131.613 | 0.895 | 0 | 0 | 0 | 0 | 6  | 1 | 1 | 0 | 0 | 0 | 1 | 0 | 5.291  |
| 562 | L890 | 6.438 | 197.426 | 0.837 | 0 | 0 | 0 | 0 | 8  | 3 | 1 | 0 | 0 | 0 | 1 | 0 | 8.301  |
| 563 | L893 | 4.622 | 176.894 | 0.978 | 0 | 0 | 0 | 0 | 8  | 2 | 1 | 0 | 0 | 0 | 2 | 0 | 7.072  |
| 564 | L894 | 5.199 | 175.043 | 0.969 | 0 | 0 | 0 | 0 | 9  | 2 | 1 | 0 | 0 | 0 | 1 | 0 | 6.911  |
| 565 | L895 | 6.016 | 141.376 | 0.729 | 0 | 0 | 0 | 0 | 6  | 2 | 1 | 0 | 0 | 0 | 1 | 0 | 5.499  |
| 566 | L896 | 4.478 | 0       | 0.749 | 0 | 0 | 0 | 0 | 5  | 2 | 0 | 0 | 0 | 3 | 1 | 0 | 5.159  |
| 567 | L897 | 5.099 | 137.51  | 0.711 | 0 | 0 | 0 | 0 | 5  | 2 | 1 | 0 | 0 | 0 | 1 | 0 | 5.369  |
| 568 | L898 | 4.547 | 154.742 | 0.868 | 0 | 0 | 0 | 0 | 5  | 2 | 1 | 0 | 0 | 0 | 1 | 0 | 6.638  |
| 569 | L899 | 4.822 | 148.14  | 0.75  | 0 | 0 | 0 | 0 | 5  | 2 | 1 | 0 | 0 | 0 | 1 | 0 | 6.054  |
| 570 | L900 | 6.027 | 145.567 | 0.684 | 0 | 0 | 0 | 0 | 6  | 2 | 1 | 0 | 0 | 0 | 1 | 0 | 5.479  |
| 571 | L902 | 5.738 | 149.995 | 0.65  | 0 | 0 | 0 | 0 | 6  | 2 | 1 | 0 | 0 | 0 | 1 | 0 | 5.466  |
| 572 | L904 | 5.749 | 154.424 | 0.622 | 0 | 0 | 0 | 0 | 6  | 2 | 1 | 0 | 0 | 0 | 1 | 0 | 5.455  |
| 573 | L906 | 5.747 | 153.059 | 0.622 | 0 | 0 | 0 | 0 | 6  | 2 | 1 | 0 | 0 | 0 | 1 | 0 | 5.455  |
| 574 | L908 | 5.435 | 149.995 | 0.65  | 0 | 0 | 0 | 0 | 6  | 2 | 1 | 0 | 0 | 0 | 1 | 0 | 5.466  |
| 575 | L910 | 5.774 | 325.241 | 0.564 | 0 | 0 | 0 | 0 | 6  | 2 | 1 | 0 | 0 | 0 | 1 | 0 | 5.461  |

|     |      |       |         |       |   |   |   |   |   |   |   |   |   |   |   |   |       |
|-----|------|-------|---------|-------|---|---|---|---|---|---|---|---|---|---|---|---|-------|
| 576 | L912 | 5.779 | 159.371 | 0.825 | 0 | 0 | 0 | 0 | 6 | 2 | 1 | 0 | 0 | 0 | 1 | 0 | 5.453 |
| 577 | L914 | 5.779 | 159.371 | 0.831 | 0 | 0 | 0 | 0 | 6 | 2 | 1 | 0 | 0 | 0 | 2 | 0 | 5.453 |
| 578 | L916 | 6.051 | 154.424 | 0.657 | 0 | 0 | 0 | 0 | 7 | 2 | 1 | 0 | 0 | 0 | 1 | 0 | 5.455 |
| 579 | L918 | 5.761 | 159.035 | 0.631 | 0 | 0 | 0 | 0 | 6 | 2 | 1 | 0 | 0 | 0 | 1 | 0 | 5.454 |
| 580 | L920 | 6.061 | 159.035 | 0.619 | 0 | 0 | 0 | 0 | 7 | 2 | 1 | 0 | 0 | 0 | 1 | 0 | 5.454 |
| 581 | L922 | 6.040 | 149.995 | 0.669 | 0 | 0 | 0 | 0 | 7 | 2 | 1 | 0 | 0 | 0 | 1 | 0 | 5.466 |
| 582 | L924 | 6.051 | 154.606 | 0.639 | 0 | 0 | 1 | 0 | 6 | 2 | 1 | 0 | 0 | 0 | 1 | 0 | 5.464 |
| 583 | L926 | 5.470 | 164.118 | 0.605 | 0 | 0 | 1 | 0 | 6 | 2 | 1 | 0 | 0 | 0 | 1 | 0 | 5.503 |
| 584 | L928 | 6.063 | 154.606 | 0.901 | 0 | 0 | 0 | 0 | 6 | 2 | 1 | 0 | 0 | 0 | 1 | 0 | 5.464 |
| 585 | L930 | 5.783 | 164.118 | 0.848 | 0 | 0 | 0 | 0 | 6 | 2 | 1 | 0 | 0 | 0 | 1 | 0 | 5.503 |
| 586 | L932 | 5.485 | 163.829 | 0.856 | 0 | 0 | 0 | 0 | 6 | 2 | 1 | 0 | 0 | 0 | 1 | 0 | 5.478 |
| 587 | L934 | 5.754 | 149.388 | 0.768 | 0 | 0 | 0 | 0 | 6 | 2 | 1 | 0 | 0 | 0 | 1 | 0 | 5.327 |
| 588 | L936 | 5.426 | 145.567 | 0.698 | 0 | 0 | 0 | 0 | 6 | 2 | 1 | 0 | 0 | 0 | 2 | 0 | 5.479 |
| 589 | L938 | 6.076 | 158.246 | 0.695 | 0 | 0 | 0 | 0 | 6 | 2 | 1 | 0 | 0 | 0 | 1 | 0 | 5.312 |
| 590 | L939 | 5.448 | 154.424 | 0.634 | 0 | 0 | 0 | 0 | 6 | 2 | 1 | 0 | 0 | 0 | 2 | 0 | 5.455 |
| 591 | L942 | 5.275 | 380.395 | 0.823 | 0 | 0 | 0 | 0 | 8 | 2 | 0 | 0 | 0 | 0 | 1 | 0 | 7.476 |
| 592 | L944 | 4.570 | 108.754 | 0.753 | 0 | 0 | 0 | 0 | 1 | 0 | 0 | 0 | 0 | 2 | 0 | 0 | 3.426 |

**Table S3.** Average values for each molecular descriptor

|    | Variable    | Exp1   | Exp2   | Exp3   | Exp4   | Exp5   | Exp6   | Exp7   | Exp8   | Exp9   | Exp10  | Average | Est. Dev. |
|----|-------------|--------|--------|--------|--------|--------|--------|--------|--------|--------|--------|---------|-----------|
|    | Intercept   | 4.328  | 4.134  | 4.336  | 4.338  | 4.358  | 4.299  | 4.256  | 4.239  | 4.286  | 4.342  | 4.292   | 0.005     |
| 1  | D/Dr06      | 0.000  | 0.001  | 0.000  | 0.001  | 0.001  | 0.001  | 0.001  | 0.001  | 0.001  | 0.001  | 0.001   | 0.000     |
| 2  | GATS6m      | -0.479 | -0.380 | -0.487 | -0.455 | -0.426 | -0.404 | -0.317 | -0.511 | -0.405 | -0.513 | -0.438  | 0.004     |
| 3  | nArCOOH     | 0.480  | 0.509  | 0.514  | 0.475  | 0.506  | 0.624  | 0.649  | 0.521  | 0.475  | 0.537  | 0.529   | 0.004     |
| 4  | nRCONH2     | 1.147  | 1.267  | 1.320  | 1.267  | 1.185  | 1.198  | 1.183  | 1.311  | 1.355  | 1.252  | 1.249   | 0.005     |
| 5  | nROR        | 0.300  | 0.401  | 0.381  | 0.341  | 0.334  | 0.326  | 0.303  | 0.298  | 0.305  | 0.347  | 0.334   | 0.001     |
| 6  | nImidazoles | -0.430 | -0.261 | -0.493 | -0.405 | -0.464 | -0.470 | -0.447 | -0.437 | -0.533 | -0.353 | -0.429  | 0.006     |
| 7  | nHDon       | 0.094  | 0.117  | 0.126  | 0.111  | 0.119  | 0.121  | 0.132  | 0.111  | 0.108  | 0.110  | 0.115   | 0.000     |
| 8  | nHBonds     | -0.144 | -0.209 | -0.231 | -0.203 | -0.213 | -0.219 | -0.232 | -0.202 | -0.188 | -0.195 | -0.204  | 0.001     |
| 9  | C-018       | 1.245  | 1.322  | 1.267  | 1.274  | 1.258  | 1.405  | 1.213  | 1.188  | 1.156  | 1.242  | 1.257   | 0.005     |
| 10 | C-029       | 0.414  | 0.480  | 0.523  | 0.469  | 0.451  | 0.516  | 0.480  | 0.464  | 0.456  | 0.506  | 0.476   | 0.001     |
| 11 | C-032       | 1.109  | 1.186  | 1.116  | 1.085  | 1.116  | 1.086  | 1.138  | 1.194  | 1.152  | 1.304  | 1.149   | 0.004     |
| 12 | H-051       | -0.128 | -0.090 | -0.099 | -0.144 | -0.102 | -0.101 | -0.089 | -0.088 | -0.086 | -0.126 | -0.105  | 0.000     |
| 13 | N-075       | -0.133 | -0.212 | -0.200 | -0.184 | -0.206 | -0.187 | -0.193 | -0.168 | -0.168 | -0.212 | -0.186  | 0.001     |
| 14 | N-079       | -0.512 | -0.589 | -0.558 | -0.581 | -0.536 | -0.543 | -0.614 | -0.525 | -0.545 | -0.544 | -0.555  | 0.001     |
| 15 | TI2         | 0.037  | 0.030  | 0.030  | 0.022  | 0.013  | 0.009  | 0.004  | 0.047  | 0.024  | 0.035  | 0.025   | 0.000     |

**Table S4.** Statistical parameters for the evaluation of the predictive power.

| Exp.      | $Q^2$ | $r^2$ | $\frac{r^2 - r_0'^2}{r^2}$ | $k$   | $k'$  | $\frac{r^2 - r_0'^2}{r^2}$ | $\overline{r_m^2}$ | $ r_0'^2 - r_0'^2 $ | $\Delta r_m^2$ |
|-----------|-------|-------|----------------------------|-------|-------|----------------------------|--------------------|---------------------|----------------|
| 1         | 0.664 | 0.680 | 0.000                      | 0.999 | 0.991 | 0.218                      | 0.548              | 0.148               | 0.261          |
| 2         | 0.674 | 0.676 | 0.001                      | 1.004 | 0.986 | 0.183                      | 0.549              | 0.124               | 0.221          |
| 3         | 0.699 | 0.682 | 0.001                      | 0.996 | 0.994 | 0.166                      | 0.557              | 0.113               | 0.209          |
| 4         | 0.674 | 0.680 | 0.001                      | 1.002 | 0.988 | 0.174                      | 0.554              | 0.119               | 0.216          |
| 5         | 0.668 | 0.682 | 0.000                      | 0.997 | 0.993 | 0.211                      | 0.552              | 0.144               | 0.259          |
| 6         | 0.679 | 0.679 | 0.002                      | 0.996 | 0.994 | 0.162                      | 0.554              | 0.110               | 0.199          |
| 7         | 0.674 | 0.678 | 0.000                      | 0.999 | 0.991 | 0.205                      | 0.549              | 0.139               | 0.247          |
| 8         | 0.685 | 0.678 | 0.001                      | 1.002 | 0.988 | 0.189                      | 0.550              | 0.128               | 0.230          |
| 9         | 0.684 | 0.678 | 0.000                      | 0.998 | 0.992 | 0.195                      | 0.549              | 0.132               | 0.236          |
| 10        | 0.686 | 0.681 | 0.001                      | 0.998 | 0.992 | 0.171                      | 0.555              | 0.117               | 0.214          |
| Average   | 0.679 | 0.679 | 0.001                      | 0.999 | 0.991 | 0.187                      | 0.552              | 0.127               | 0.229          |
| Est. Dev. | 0.000 | 0.000 | 0.000                      | 0.000 | 0.000 | 0.000                      | 0.000              | 0.000               | 0.000          |

$$r^2 = \frac{[\sum(Y_{obs} - \overline{Y_{obs}})(Y_{pred} - \overline{Y_{pred}})]^2}{\sum(Y_{pred} - \overline{Y_{pred}})^2 \sum(Y_{obs} - \overline{Y_{obs}})^2} \quad (S1)$$

$$r_0'^2 = 1 - \frac{[\sum(Y_{obs} - (k * Y_{pred}))]^2}{\sum(Y_{obs} - \overline{Y_{obs}})^2} \quad (S2)$$

$$r_0'^2 = 1 - \frac{[\sum(Y_{pred} - (k' * Y_{obs}))]^2}{\sum(Y_{pred} - \overline{Y_{pred}})^2} \quad (S3)$$

$$k = \frac{\sum(Y_{obs} * Y_{pred})}{\sum(Y_{pred})^2} \quad (S4)$$

$$k' = \frac{\sum(Y_{obs} * Y_{pred})}{\sum(Y_{obs})^2} \quad (S5)$$

**Table S5.** List of molecules used for the validation tests sets, their calculated molecular descriptors, and predicted *p*MIC values. Molecules were obtained as follows: (a) 1 to 10 from reference <sup>8</sup>; (b) 11 to 32 from reference <sup>9</sup>; (c) 33 to 39 from reference <sup>10</sup>; 40 to 45 from reference; 46 and 47 from reference <sup>11</sup>; 48 to 76 from reference <sup>12</sup>; and 77 to 98 from reference <sup>13</sup>.

| No. | MolID | <i>p</i> MIC | MW     | D/Dr06  | GATS6m | nArCOOH | nRCONH2 | nROR | nImidazoles | nHDon | nHBonds | C-018 | C-029 | C-032 | H-051 | N-075 | N-079 | TI2   | <i>p</i> MIC <sub>pred</sub> |
|-----|-------|--------------|--------|---------|--------|---------|---------|------|-------------|-------|---------|-------|-------|-------|-------|-------|-------|-------|------------------------------|
| 1   | P001  | 5.040        | 411.49 | 292.916 | 0.831  | 0       | 0       | 0    | 0           | 1     | 0       | 0     | 0     | 0     | 0     | 0     | 0     | 2.81  | 4.280                        |
| 2   | P002  | 4.103        | 380.52 | 264.61  | 1.416  | 0       | 0       | 0    | 0           | 1     | 0       | 0     | 0     | 0     | 0     | 0     | 0     | 2.594 | 4.002                        |
| 3   | P003  | 3.807        | 384.48 | 264.61  | 0.779  | 0       | 0       | 0    | 0           | 1     | 0       | 0     | 0     | 0     | 0     | 0     | 0     | 2.594 | 4.281                        |
| 4   | P004  | 4.172        | 445.38 | 264.61  | 0.583  | 0       | 0       | 0    | 0           | 1     | 0       | 0     | 0     | 0     | 0     | 0     | 0     | 2.594 | 4.367                        |
| 5   | P005  | 4.730        | 402.47 | 274.785 | 1.073  | 0       | 0       | 0    | 0           | 1     | 0       | 0     | 0     | 0     | 0     | 0     | 0     | 2.603 | 4.159                        |
| 6   | P006  | 4.760        | 431.35 | 255.939 | 0.6    | 0       | 0       | 0    | 0           | 1     | 0       | 0     | 0     | 0     | 0     | 0     | 0     | 2.672 | 4.357                        |
| 7   | P007  | 4.803        | 476.35 | 296.928 | 0.634  | 0       | 0       | 0    | 0           | 1     | 0       | 0     | 0     | 0     | 0     | 0     | 0     | 2.811 | 4.369                        |
| 8   | P008  | 3.747        | 335.39 | 164.429 | 0.765  | 0       | 0       | 0    | 0           | 1     | 0       | 0     | 0     | 0     | 0     | 0     | 0     | 2.736 | 4.234                        |
| 9   | P009  | 4.938        | 324.83 | 142.277 | 0.739  | 0       | 0       | 0    | 0           | 1     | 0       | 0     | 0     | 0     | 0     | 0     | 0     | 2.268 | 4.221                        |
| 10  | P010  | 4.037        | 326.37 | 150.278 | 1.223  | 0       | 0       | 0    | 0           | 1     | 0       | 0     | 0     | 0     | 0     | 0     | 0     | 2.339 | 4.015                        |
| 11  | P011  | 4.648        | 355.44 | 86.758  | 0.844  | 0       | 0       | 0    | 0           | 5     | 1       | 0     | 0     | 0     | 0     | 1     | 0     | 4.245 | 4.261                        |
| 12  | P012  | 4.393        | 395.51 | 100.554 | 0.77   | 0       | 0       | 0    | 0           | 4     | 1       | 0     | 0     | 0     | 0     | 1     | 0     | 4.847 | 4.202                        |
| 13  | P013  | 4.090        | 393.49 | 100.554 | 0.77   | 0       | 0       | 0    | 0           | 4     | 1       | 0     | 0     | 0     | 0     | 1     | 0     | 4.847 | 4.202                        |
| 14  | P014  | 5.068        | 467.96 | 235.976 | 0.85   | 0       | 0       | 0    | 0           | 4     | 1       | 0     | 1     | 1     | 0     | 3     | 0     | 5.555 | 5.513                        |
| 15  | P015  | 4.438        | 438.56 | 106.005 | 0.844  | 0       | 0       | 0    | 0           | 4     | 1       | 0     | 0     | 0     | 0     | 2     | 0     | 5.198 | 3.995                        |
| 16  | P016  | 4.453        | 453.58 | 110.383 | 0.817  | 0       | 0       | 0    | 0           | 4     | 1       | 0     | 0     | 0     | 3     | 3     | 0     | 5.389 | 3.511                        |
| 17  | P017  | 4.135        | 436.52 | 110.383 | 0.724  | 0       | 0       | 0    | 0           | 4     | 1       | 0     | 0     | 0     | 3     | 2     | 0     | 5.389 | 3.738                        |
| 18  | P018  | 4.450        | 450.55 | 113.825 | 0.705  | 0       | 0       | 0    | 0           | 4     | 1       | 0     | 0     | 0     | 3     | 2     | 0     | 5.534 | 3.752                        |
| 19  | P019  | 4.734        | 433.52 | 228.131 | 0.714  | 0       | 0       | 0    | 0           | 4     | 1       | 0     | 0     | 1     | 0     | 3     | 0     | 5.382 | 5.088                        |
| 20  | P020  | 4.146        | 447.55 | 235.976 | 0.693  | 0       | 0       | 0    | 0           | 4     | 1       | 0     | 0     | 1     | 3     | 3     | 0     | 5.555 | 4.790                        |
| 21  | P021  | 4.161        | 463.55 | 246.209 | 0.857  | 0       | 0       | 0    | 0           | 4     | 1       | 0     | 0     | 1     | 0     | 3     | 0     | 5.756 | 5.045                        |
| 22  | P022  | 4.159        | 461.58 | 243.821 | 0.677  | 0       | 0       | 0    | 0           | 4     | 1       | 0     | 0     | 1     | 6     | 3     | 0     | 5.701 | 4.489                        |
| 23  | P023  | 3.559        | 463.55 | 244.305 | 0.88   | 0       | 0       | 0    | 0           | 4     | 1       | 0     | 2     | 0     | 0     | 3     | 0     | 5.735 | 4.837                        |

|    |      |       |        |         |       |   |   |   |   |   |   |   |   |   |   |   |   |        |       |
|----|------|-------|--------|---------|-------|---|---|---|---|---|---|---|---|---|---|---|---|--------|-------|
| 24 | P024 | 4.790 | 493.58 | 260.48  | 1.025 | 0 | 0 | 0 | 0 | 4 | 1 | 0 | 2 | 1 | 0 | 3 | 0 | 5.974  | 5.937 |
| 25 | P025 | 4.432 | 432.53 | 228.131 | 0.704 | 0 | 0 | 0 | 0 | 4 | 1 | 0 | 1 | 0 | 0 | 2 | 0 | 5.382  | 4.606 |
| 26 | P026 | 4.462 | 463.55 | 242.713 | 0.696 | 0 | 0 | 0 | 0 | 4 | 1 | 0 | 2 | 0 | 0 | 3 | 0 | 5.675  | 4.915 |
| 27 | P027 | 3.860 | 463.55 | 246.209 | 0.857 | 0 | 0 | 0 | 0 | 4 | 1 | 0 | 2 | 0 | 0 | 3 | 0 | 5.756  | 4.849 |
| 28 | P028 | 4.664 | 369.47 | 92.854  | 0.837 | 0 | 0 | 0 | 0 | 5 | 1 | 0 | 0 | 0 | 0 | 1 | 0 | 4.935  | 4.285 |
| 29 | P029 | 5.885 | 383.5  | 98.843  | 0.918 | 0 | 0 | 0 | 0 | 5 | 1 | 0 | 0 | 0 | 0 | 1 | 0 | 5.611  | 4.270 |
| 30 | P030 | 4.094 | 397.48 | 100.409 | 0.794 | 0 | 0 | 0 | 0 | 4 | 1 | 0 | 0 | 0 | 3 | 1 | 0 | 4.809  | 3.874 |
| 31 | P031 | 4.997 | 397.49 | 100.409 | 0.794 | 0 | 0 | 0 | 0 | 7 | 2 | 0 | 0 | 0 | 0 | 1 | 0 | 4.809  | 4.331 |
| 32 | P032 | 6.264 | 459.55 | 249.294 | 0.897 | 0 | 0 | 0 | 0 | 4 | 1 | 0 | 0 | 0 | 0 | 1 | 0 | 5.818  | 4.255 |
| 33 | P033 | 4.549 | 566.9  | 644.687 | 1.162 | 0 | 0 | 0 | 0 | 0 | 0 | 0 | 2 | 0 | 0 | 2 | 2 | 8.161  | 3.824 |
| 34 | P034 | 4.590 | 623.02 | 719.33  | 1.178 | 0 | 0 | 0 | 0 | 0 | 0 | 0 | 2 | 0 | 0 | 2 | 2 | 9.329  | 3.889 |
| 35 | P035 | 4.549 | 566.9  | 704.755 | 1.462 | 0 | 0 | 0 | 0 | 0 | 0 | 0 | 0 | 0 | 0 | 2 | 2 | 8.716  | 2.789 |
| 36 | P036 | 5.192 | 623.02 | 791.073 | 1.465 | 0 | 0 | 0 | 0 | 0 | 0 | 0 | 0 | 0 | 0 | 2 | 2 | 9.958  | 2.868 |
| 37 | P037 | 4.561 | 582.9  | 730.69  | 1.049 | 0 | 0 | 0 | 0 | 0 | 0 | 0 | 0 | 0 | 0 | 2 | 2 | 9.287  | 2.999 |
| 38 | P038 | 4.601 | 639.02 | 817.152 | 1.05  | 0 | 0 | 0 | 0 | 0 | 0 | 0 | 0 | 0 | 0 | 2 | 2 | 10.507 | 3.079 |
| 39 | P039 | 4.620 | 667.08 | 860.738 | 1.051 | 0 | 0 | 0 | 0 | 0 | 0 | 0 | 0 | 0 | 0 | 2 | 2 | 11.148 | 3.119 |
| 40 | P040 | 5.256 | 564.92 | 94.221  | 1.765 | 0 | 0 | 0 | 0 | 4 | 1 | 0 | 0 | 0 | 3 | 0 | 0 | 6.233  | 3.667 |
| 41 | P041 | 5.510 | 566.94 | 94.221  | 1.765 | 0 | 0 | 0 | 0 | 5 | 1 | 0 | 0 | 0 | 0 | 0 | 0 | 6.233  | 4.098 |
| 42 | P042 | 5.338 | 681.11 | 126.495 | 1.677 | 0 | 0 | 0 | 0 | 8 | 2 | 0 | 0 | 0 | 0 | 0 | 0 | 8.446  | 4.351 |
| 43 | P043 | 5.300 | 624    | 109.95  | 1.73  | 0 | 0 | 0 | 0 | 6 | 2 | 0 | 0 | 0 | 0 | 0 | 0 | 7.361  | 4.062 |
| 44 | P044 | 5.290 | 610.02 | 106.016 | 1.734 | 0 | 0 | 0 | 0 | 6 | 1 | 0 | 0 | 0 | 0 | 0 | 0 | 7.103  | 4.255 |
| 45 | P045 | 6.171 | 444.48 | 221.13  | 1.164 | 0 | 0 | 0 | 0 | 7 | 4 | 0 | 0 | 0 | 0 | 0 | 0 | 2.026  | 3.948 |
| 46 | P046 | 3.872 | 372.46 | 230.709 | 1.935 | 0 | 0 | 0 | 1 | 2 | 0 | 0 | 0 | 0 | 5 | 1 | 0 | 6.505  | 2.825 |
| 47 | P047 | 3.946 | 441.34 | 251.358 | 1.051 | 0 | 0 | 0 | 1 | 2 | 1 | 0 | 0 | 0 | 5 | 1 | 0 | 6.718  | 3.026 |
| 48 | P048 | 3.421 | 337.39 | 163.964 | 1.044 | 0 | 0 | 1 | 0 | 1 | 1 | 0 | 0 | 0 | 3 | 0 | 0 | 3.901  | 3.954 |
| 49 | P049 | 3.496 | 401.44 | 317.333 | 1.064 | 0 | 0 | 1 | 0 | 1 | 1 | 0 | 0 | 0 | 0 | 2 | 0 | 5.295  | 4.011 |
| 50 | P050 | 3.591 | 499.4  | 215.396 | 0.517 | 0 | 0 | 1 | 0 | 1 | 1 | 0 | 0 | 0 | 3 | 1 | 0 | 5.496  | 4.068 |
| 51 | P051 | 3.501 | 405.44 | 208.358 | 1.137 | 0 | 0 | 1 | 0 | 2 | 2 | 0 | 0 | 0 | 2 | 3 | 0 | 5.488  | 3.436 |
| 52 | P052 | 3.545 | 448.46 | 234.275 | 0.874 | 0 | 0 | 1 | 1 | 1 | 1 | 0 | 1 | 0 | 0 | 1 | 0 | 5.923  | 4.295 |

|    |      |       |        |         |       |   |   |   |   |   |   |   |   |   |   |   |   |       |       |
|----|------|-------|--------|---------|-------|---|---|---|---|---|---|---|---|---|---|---|---|-------|-------|
| 53 | P053 | 3.579 | 485.37 | 207.282 | 0.517 | 0 | 0 | 1 | 0 | 1 | 1 | 0 | 0 | 0 | 0 | 1 | 0 | 5.303 | 4.374 |
| 54 | P054 | 3.517 | 420.51 | 206.103 | 0.876 | 0 | 0 | 1 | 0 | 1 | 0 | 0 | 0 | 0 | 3 | 1 | 0 | 5.277 | 4.103 |
| 55 | P055 | 3.502 | 406.48 | 197.99  | 0.879 | 0 | 0 | 1 | 0 | 1 | 0 | 0 | 0 | 0 | 0 | 1 | 0 | 5.044 | 4.407 |
| 56 | P056 | 3.484 | 390.41 | 197.99  | 1.033 | 0 | 0 | 1 | 0 | 1 | 0 | 0 | 0 | 0 | 0 | 1 | 0 | 5.044 | 4.340 |
| 57 | P057 | 3.501 | 405.49 | 197.99  | 0.869 | 0 | 0 | 1 | 0 | 1 | 0 | 0 | 0 | 0 | 0 | 0 | 0 | 5.044 | 4.598 |
| 58 | P058 | 3.501 | 405.49 | 197.99  | 0.629 | 0 | 0 | 1 | 0 | 1 | 0 | 0 | 0 | 0 | 0 | 0 | 0 | 5.044 | 4.703 |
| 59 | P059 | 3.482 | 388.44 | 197.99  | 1.104 | 0 | 0 | 1 | 0 | 2 | 0 | 0 | 0 | 0 | 0 | 0 | 0 | 5.044 | 4.610 |
| 60 | P060 | 3.494 | 399.46 | 317.333 | 1.076 | 0 | 0 | 1 | 0 | 1 | 0 | 0 | 0 | 0 | 0 | 0 | 0 | 5.295 | 4.582 |
| 61 | P061 | 3.524 | 427.52 | 348.902 | 1.082 | 0 | 0 | 1 | 0 | 1 | 0 | 0 | 0 | 0 | 2 | 0 | 0 | 6.042 | 4.405 |
| 62 | P062 | 3.537 | 440.47 | 329.53  | 1.099 | 0 | 0 | 1 | 0 | 1 | 1 | 0 | 0 | 0 | 0 | 1 | 0 | 5.933 | 4.205 |
| 63 | P063 | 3.535 | 438.5  | 329.53  | 1.135 | 0 | 0 | 1 | 0 | 2 | 1 | 0 | 0 | 0 | 0 | 0 | 0 | 5.933 | 4.490 |
| 64 | P064 | 3.559 | 463.55 | 445.155 | 1.182 | 0 | 0 | 1 | 0 | 1 | 0 | 0 | 0 | 0 | 2 | 0 | 0 | 6.588 | 4.430 |
| 65 | P065 | 3.505 | 409.53 | 197.99  | 0.869 | 0 | 0 | 1 | 0 | 1 | 0 | 0 | 0 | 0 | 0 | 0 | 0 | 5.044 | 4.598 |
| 66 | P066 | 3.487 | 392.48 | 197.99  | 1.104 | 0 | 0 | 1 | 0 | 2 | 1 | 0 | 0 | 0 | 1 | 0 | 0 | 5.044 | 4.301 |
| 67 | P067 | 3.502 | 406.51 | 207.282 | 1.096 | 0 | 0 | 1 | 0 | 1 | 1 | 0 | 0 | 0 | 1 | 0 | 0 | 5.303 | 4.202 |
| 68 | P068 | 3.483 | 389.47 | 197.99  | 1.083 | 0 | 0 | 1 | 0 | 1 | 0 | 0 | 0 | 0 | 1 | 0 | 0 | 5.044 | 4.399 |
| 69 | P069 | 3.439 | 351.42 | 173.546 | 1.071 | 0 | 0 | 1 | 0 | 1 | 1 | 0 | 0 | 0 | 2 | 0 | 0 | 4.201 | 4.061 |
| 70 | P070 | 3.456 | 365.45 | 183.284 | 1.06  | 0 | 0 | 1 | 0 | 1 | 1 | 0 | 0 | 0 | 2 | 0 | 0 | 4.538 | 4.079 |
| 71 | P071 | 3.456 | 365.45 | 183.128 | 1.098 | 0 | 0 | 1 | 0 | 1 | 1 | 0 | 0 | 0 | 1 | 0 | 0 | 4.488 | 4.167 |
| 72 | P072 | 3.453 | 363.43 | 181.84  | 1.098 | 0 | 0 | 1 | 0 | 1 | 1 | 0 | 0 | 0 | 1 | 0 | 0 | 4.488 | 4.166 |
| 73 | P073 | 3.470 | 377.46 | 190.459 | 1.09  | 0 | 0 | 1 | 0 | 1 | 1 | 0 | 0 | 0 | 1 | 0 | 0 | 4.774 | 4.182 |
| 74 | P074 | 3.440 | 352.41 | 173.546 | 1.041 | 0 | 0 | 1 | 0 | 3 | 1 | 0 | 0 | 0 | 0 | 0 | 0 | 4.201 | 4.514 |
| 75 | P075 | 3.457 | 366.44 | 183.284 | 1.087 | 0 | 0 | 1 | 0 | 3 | 1 | 0 | 0 | 0 | 2 | 0 | 0 | 4.538 | 4.297 |
| 76 | P076 | 3.473 | 380.47 | 193.158 | 1.075 | 0 | 0 | 1 | 0 | 3 | 1 | 0 | 0 | 0 | 2 | 0 | 0 | 4.909 | 4.317 |
| 77 | P077 | 6.006 | 506.57 | 484.937 | 0.935 | 0 | 0 | 0 | 0 | 1 | 0 | 0 | 4 | 0 | 0 | 2 | 0 | 6.202 | 5.960 |
| 78 | P078 | 7.228 | 506.57 | 484.937 | 0.989 | 0 | 0 | 0 | 0 | 2 | 0 | 0 | 4 | 0 | 0 | 2 | 0 | 6.202 | 6.051 |
| 79 | P079 | 5.705 | 506.57 | 484.937 | 0.953 | 0 | 0 | 0 | 0 | 2 | 0 | 0 | 2 | 0 | 0 | 2 | 0 | 6.202 | 5.115 |
| 80 | P080 | 6.927 | 507.56 | 484.937 | 0.988 | 0 | 0 | 0 | 0 | 2 | 0 | 0 | 4 | 0 | 0 | 2 | 0 | 6.202 | 6.051 |
| 81 | P081 | 6.926 | 505.58 | 484.937 | 0.973 | 0 | 0 | 0 | 0 | 2 | 0 | 0 | 2 | 0 | 0 | 1 | 0 | 6.202 | 5.292 |

|    |      |       |        |         |       |   |   |   |   |   |   |   |   |   |   |   |   |       |       |
|----|------|-------|--------|---------|-------|---|---|---|---|---|---|---|---|---|---|---|---|-------|-------|
| 82 | P082 | 6.626 | 507.56 | 484.937 | 0.971 | 0 | 0 | 0 | 0 | 2 | 0 | 0 | 4 | 0 | 0 | 3 | 0 | 6.202 | 5.872 |
| 83 | P083 | 6.006 | 506.57 | 484.937 | 0.936 | 0 | 0 | 0 | 0 | 2 | 0 | 0 | 3 | 0 | 0 | 2 | 0 | 6.202 | 5.598 |
| 84 | P084 | 4.200 | 507.56 | 484.937 | 0.953 | 0 | 0 | 0 | 0 | 2 | 0 | 0 | 3 | 1 | 0 | 3 | 0 | 6.202 | 6.553 |
| 85 | P085 | 3.909 | 519.56 | 501.962 | 1.158 | 1 | 0 | 0 | 0 | 3 | 0 | 0 | 2 | 0 | 0 | 1 | 0 | 6.347 | 5.868 |
| 86 | P086 | 4.796 | 500.56 | 485.563 | 0.984 | 0 | 0 | 0 | 0 | 2 | 0 | 0 | 2 | 0 | 0 | 1 | 0 | 6.213 | 5.288 |
| 87 | P087 | 6.302 | 500.56 | 484.937 | 1.061 | 0 | 0 | 0 | 0 | 2 | 0 | 0 | 2 | 0 | 0 | 1 | 0 | 6.202 | 5.254 |
| 88 | P088 | 5.700 | 501.55 | 484.937 | 1.036 | 0 | 0 | 0 | 0 | 2 | 0 | 0 | 2 | 0 | 0 | 2 | 0 | 6.202 | 5.078 |
| 89 | P089 | 7.217 | 494.53 | 467.912 | 1.022 | 0 | 0 | 0 | 0 | 2 | 0 | 0 | 2 | 0 | 0 | 1 | 0 | 6.049 | 5.257 |
| 90 | P090 | 7.542 | 522.64 | 484.937 | 0.863 | 0 | 0 | 0 | 0 | 2 | 0 | 0 | 4 | 0 | 0 | 2 | 0 | 6.202 | 6.106 |
| 91 | P091 | 6.635 | 517.62 | 484.937 | 0.865 | 0 | 0 | 0 | 0 | 2 | 0 | 0 | 2 | 0 | 0 | 2 | 0 | 6.202 | 5.153 |
| 92 | P092 | 5.705 | 507.56 | 484.937 | 0.953 | 0 | 0 | 0 | 0 | 2 | 0 | 0 | 3 | 1 | 0 | 3 | 0 | 6.202 | 6.553 |
| 93 | P093 | 5.728 | 534.63 | 519.047 | 0.981 | 0 | 0 | 0 | 0 | 2 | 0 | 0 | 4 | 0 | 0 | 2 | 0 | 6.359 | 6.078 |
| 94 | P094 | 6.938 | 520.6  | 513.191 | 0.915 | 0 | 0 | 0 | 0 | 2 | 0 | 0 | 4 | 0 | 0 | 2 | 0 | 6.896 | 6.116 |
| 95 | P095 | 6.627 | 508.56 | 495.866 | 1.026 | 0 | 0 | 0 | 0 | 2 | 0 | 0 | 2 | 0 | 0 | 1 | 0 | 6.731 | 5.288 |
| 96 | P096 | 6.632 | 514.59 | 513.191 | 1.02  | 0 | 0 | 0 | 0 | 2 | 0 | 0 | 2 | 0 | 0 | 1 | 0 | 6.896 | 5.305 |
| 97 | P097 | 6.018 | 520.6  | 513.191 | 0.951 | 0 | 0 | 0 | 0 | 2 | 0 | 0 | 2 | 0 | 0 | 2 | 0 | 6.896 | 5.149 |
| 98 | P098 | 5.411 | 515.58 | 513.191 | 1.033 | 0 | 0 | 0 | 0 | 2 | 0 | 0 | 2 | 0 | 0 | 2 | 0 | 6.896 | 5.113 |



**Table S6.** List of molecules from the BIOFACQUIM database, their calculated molecular descriptors, and predicted *p*MIC values. The C-029, C-032 and N-079 were omitted as all of their values were zero. Data were obtained from the reference <sup>14</sup>.

| No. | MolID   | MW     | D/Dr06  | GATS6m | nArCOOH | nRCONH2 | nROR | nImidazoles | nHDon | nHBonds | C-018 | H-051 | N-075 | TI2   | <i>p</i> MIC |
|-----|---------|--------|---------|--------|---------|---------|------|-------------|-------|---------|-------|-------|-------|-------|--------------|
| 1   | FQNP001 | 344.34 | 197.427 | 0.893  | 0       | 0       | 1    | 0           | 2     | 2       | 0     | 0     | 0     | 2.635 | 4.235        |
| 2   | FQNP002 | 248.35 | 60.75   | 1.7    | 0       | 0       | 0    | 0           | 1     | 0       | 0     | 0     | 0     | 1.427 | 3.732        |
| 3   | FQNP007 | 170.18 | 31.526  | 0      | 0       | 0       | 2    | 0           | 1     | 1       | 0     | 0     | 0     | 1.24  | 4.919        |
| 4   | FQNP008 | 168.16 | 37.924  | 2.063  | 0       | 0       | 1    | 0           | 1     | 0       | 0     | 0     | 0     | 1.27  | 3.890        |
| 5   | FQNP009 | 184.16 | 41.79   | 1.95   | 0       | 0       | 1    | 0           | 2     | 1       | 0     | 0     | 0     | 1.173 | 3.850        |
| 6   | FQNP010 | 206.64 | 41.79   | 6.677  | 0       | 0       | 1    | 0           | 2     | 2       | 0     | 0     | 0     | 1.221 | 1.578        |
| 7   | FQNP011 | 167.18 | 37.924  | 2.467  | 0       | 0       | 0    | 0           | 2     | 0       | 0     | 0     | 0     | 1.27  | 3.494        |
| 8   | FQNP012 | 263.32 | 124.927 | 1.138  | 0       | 0       | 1    | 0           | 3     | 1       | 0     | 0     | 0     | 2.766 | 4.408        |
| 9   | FQNP013 | 299.4  | 155.266 | 1.021  | 0       | 0       | 1    | 0           | 1     | 1       | 0     | 0     | 0     | 3.893 | 4.275        |
| 10  | FQNP014 | 642.6  | 905.967 | 0.827  | 0       | 0       | 0    | 0           | 4     | 4       | 0     | 0     | 0     | 6.373 | 4.251        |
| 11  | FQNP015 | 468.6  | 238.283 | 1.081  | 0       | 0       | 2    | 0           | 4     | 2       | 0     | 5     | 0     | 3.682 | 4.238        |
| 12  | FQNP016 | 508.62 | 260.667 | 0.993  | 0       | 0       | 2    | 0           | 4     | 3       | 0     | 0     | 0     | 4.062 | 4.623        |
| 13  | FQNP017 | 538.65 | 278.539 | 0.977  | 0       | 0       | 3    | 0           | 4     | 3       | 0     | 0     | 0     | 4.371 | 4.981        |
| 14  | FQNP018 | 538.65 | 279.997 | 0.977  | 0       | 0       | 3    | 0           | 4     | 3       | 0     | 0     | 0     | 4.393 | 4.982        |
| 15  | FQNP019 | 492.62 | 252.747 | 0.964  | 0       | 0       | 2    | 0           | 4     | 3       | 0     | 0     | 0     | 3.923 | 4.627        |
| 16  | FQNP020 | 316.28 | 178.548 | 0.847  | 0       | 0       | 0    | 0           | 4     | 3       | 0     | 0     | 0     | 2.752 | 3.940        |
| 17  | FQNP021 | 432.41 | 362.775 | 0.791  | 0       | 0       | 1    | 0           | 6     | 3       | 0     | 0     | 0     | 4.198 | 4.669        |
| 18  | FQNP022 | 344.34 | 201.632 | 0.882  | 0       | 0       | 0    | 0           | 2     | 2       | 0     | 0     | 0     | 3.041 | 3.919        |
| 19  | FQNP023 | 250.37 | 81.198  | 1.236  | 0       | 0       | 0    | 0           | 2     | 0       | 0     | 0     | 0     | 1.549 | 4.065        |
| 20  | FQNP024 | 234.37 | 76.119  | 1.648  | 0       | 0       | 0    | 0           | 1     | 0       | 0     | 0     | 0     | 1.634 | 3.769        |
| 21  | FQNP025 | 248.35 | 74.007  | 1.236  | 0       | 0       | 1    | 0           | 1     | 0       | 0     | 0     | 0     | 1.499 | 4.278        |
| 22  | FQNP026 | 250.37 | 74.007  | 1.236  | 0       | 0       | 1    | 0           | 2     | 0       | 0     | 0     | 0     | 1.499 | 4.393        |
| 23  | FQNP027 | 384.41 | 171.69  | 1.059  | 0       | 0       | 2    | 0           | 2     | 0       | 0     | 0     | 0     | 1.443 | 4.859        |
| 24  | FQNP028 | 462.48 | 318.519 | 0.787  | 0       | 0       | 2    | 0           | 2     | 0       | 0     | 0     | 0     | 2.107 | 5.078        |

|    |         |        |         |       |   |   |   |   |   |   |   |   |   |       |       |
|----|---------|--------|---------|-------|---|---|---|---|---|---|---|---|---|-------|-------|
| 25 | FQNP029 | 292.26 | 108.265 | 0.476 | 0 | 0 | 1 | 0 | 2 | 2 | 0 | 0 | 0 | 1.166 | 4.330 |
| 26 | FQNP030 | 274.24 | 101.297 | 0.399 | 0 | 0 | 1 | 0 | 1 | 0 | 1 | 0 | 0 | 1.208 | 5.910 |
| 27 | FQNP031 | 248.25 | 79.846  | 0.642 | 0 | 0 | 1 | 0 | 1 | 1 | 0 | 0 | 0 | 1.519 | 4.339 |
| 28 | FQNP032 | 210.62 | 26.957  | 2.896 | 0 | 0 | 0 | 0 | 1 | 0 | 0 | 0 | 0 | 1.421 | 3.189 |
| 29 | FQNP033 | 342.33 | 119.54  | 0.909 | 0 | 0 | 1 | 0 | 5 | 3 | 0 | 0 | 0 | 3.373 | 4.343 |
| 30 | FQNP034 | 176.18 | 24.549  | 1.733 | 0 | 0 | 0 | 0 | 1 | 0 | 0 | 0 | 0 | 1.343 | 3.695 |
| 31 | FQNP035 | 224.28 | 38.08   | 1.25  | 0 | 0 | 1 | 0 | 3 | 1 | 0 | 0 | 0 | 2.84  | 4.311 |
| 32 | FQNP036 | 226.25 | 45.591  | 1.091 | 0 | 0 | 0 | 0 | 2 | 0 | 0 | 2 | 0 | 1.32  | 3.892 |
| 33 | FQNP037 | 224.23 | 45.591  | 1.091 | 0 | 0 | 0 | 0 | 2 | 0 | 0 | 0 | 0 | 1.32  | 4.102 |
| 34 | FQNP038 | 180.22 | 42.114  | 1.3   | 0 | 0 | 0 | 0 | 2 | 0 | 0 | 3 | 0 | 1.502 | 3.697 |
| 35 | FQNP039 | 404.51 | 208.41  | 1.05  | 0 | 0 | 5 | 0 | 2 | 2 | 0 | 0 | 0 | 3.678 | 5.533 |
| 36 | FQNP040 | 194.2  | 55.767  | 1.138 | 0 | 0 | 0 | 0 | 2 | 1 | 0 | 0 | 0 | 1.148 | 3.880 |
| 37 | FQNP041 | 194.2  | 55.767  | 1.138 | 0 | 0 | 0 | 0 | 2 | 1 | 0 | 0 | 0 | 1.148 | 3.880 |
| 38 | FQNP042 | 192.23 | 56.472  | 0.919 | 0 | 0 | 0 | 0 | 0 | 0 | 0 | 0 | 0 | 1.379 | 3.956 |
| 39 | FQNP044 | 170.18 | 31.526  | 0     | 0 | 0 | 2 | 0 | 1 | 1 | 0 | 0 | 0 | 1.24  | 4.919 |
| 40 | FQNP045 | 172.2  | 37.924  | 0     | 0 | 0 | 1 | 0 | 2 | 1 | 0 | 2 | 0 | 1.253 | 4.493 |
| 41 | FQNP046 | 418.53 | 194.21  | 1.485 | 0 | 0 | 0 | 0 | 2 | 0 | 0 | 0 | 0 | 2.76  | 4.051 |
| 42 | FQNP047 | 460.57 | 215.462 | 1.493 | 0 | 0 | 0 | 0 | 1 | 0 | 0 | 3 | 0 | 2.657 | 3.626 |
| 43 | FQNP048 | 452.55 | 230.455 | 1.406 | 0 | 0 | 0 | 0 | 5 | 3 | 0 | 0 | 0 | 4.969 | 3.895 |
| 44 | FQNP049 | 436.55 | 223.697 | 1.417 | 0 | 0 | 0 | 0 | 4 | 2 | 0 | 0 | 0 | 4.977 | 3.975 |
| 45 | FQNP050 | 420.55 | 210.898 | 1.289 | 0 | 0 | 0 | 0 | 4 | 1 | 0 | 0 | 0 | 5.218 | 4.233 |
| 46 | FQNP051 | 434.53 | 202.035 | 1.486 | 0 | 0 | 0 | 0 | 3 | 1 | 0 | 0 | 0 | 2.747 | 3.966 |
| 47 | FQNP052 | 476.57 | 223.286 | 1.489 | 0 | 0 | 0 | 0 | 2 | 1 | 0 | 3 | 0 | 2.633 | 3.543 |
| 48 | FQNP053 | 466.58 | 239.281 | 1.376 | 0 | 0 | 0 | 0 | 4 | 2 | 0 | 0 | 0 | 4.823 | 3.998 |
| 49 | FQNP059 | 402.48 | 228.301 | 1.071 | 0 | 0 | 1 | 0 | 1 | 1 | 0 | 0 | 0 | 6.528 | 4.360 |
| 50 | FQNP060 | 388.45 | 219.002 | 1.078 | 0 | 0 | 1 | 0 | 2 | 0 | 0 | 0 | 0 | 6.272 | 4.664 |
| 51 | FQNP061 | 402.48 | 228.301 | 1.071 | 0 | 0 | 1 | 0 | 1 | 1 | 0 | 0 | 0 | 6.528 | 4.360 |
| 52 | FQNP062 | 388.45 | 219.002 | 1.078 | 0 | 0 | 1 | 0 | 2 | 0 | 0 | 0 | 0 | 6.272 | 4.664 |
| 53 | FQNP063 | 404.45 | 227.357 | 1.057 | 0 | 0 | 1 | 0 | 3 | 1 | 0 | 0 | 0 | 6.479 | 4.594 |

|    |         |         |          |       |   |   |    |   |    |    |   |    |   |        |        |
|----|---------|---------|----------|-------|---|---|----|---|----|----|---|----|---|--------|--------|
| 54 | FQNP077 | 1167.41 | 1692.143 | 0.951 | 0 | 0 | 12 | 0 | 16 | 8  | 0 | 2  | 0 | 8.304  | 9.049  |
| 55 | FQNP078 | 1195.47 | 1739.777 | 0.958 | 0 | 0 | 12 | 0 | 16 | 8  | 0 | 2  | 0 | 8.397  | 9.076  |
| 56 | FQNP079 | 1341.63 | 2360.184 | 0.965 | 0 | 0 | 13 | 0 | 19 | 10 | 0 | 2  | 0 | 10.723 | 9.756  |
| 57 | FQNP080 | 1690.16 | 2257.102 | 1.01  | 0 | 0 | 14 | 0 | 13 | 8  | 0 | 9  | 0 | 6.18   | 8.879  |
| 58 | FQNP081 | 2473.43 | 6328.172 | 1.071 | 0 | 0 | 19 | 0 | 16 | 11 | 0 | 10 | 0 | 20.998 | 12.845 |
| 59 | FQNP082 | 2449.3  | 7015.971 | 1.082 | 0 | 0 | 19 | 0 | 16 | 11 | 0 | 8  | 0 | 21.234 | 13.451 |
| 60 | FQNP083 | 2445.37 | 6531.924 | 1.071 | 0 | 0 | 19 | 0 | 16 | 11 | 0 | 10 | 0 | 21.416 | 12.972 |
| 61 | FQNP084 | 2501.49 | 6713.547 | 1.076 | 0 | 0 | 19 | 0 | 16 | 9  | 0 | 10 | 0 | 21.566 | 13.485 |
| 62 | FQNP085 | 248.35  | 65.655   | 0.729 | 0 | 0 | 0  | 0 | 1  | 1  | 0 | 0  | 0 | 3.637  | 4.012  |
| 63 | FQNP086 | 248.35  | 32.852   | 0     | 0 | 0 | 0  | 0 | 1  | 1  | 0 | 1  | 0 | 0.868  | 4.138  |
| 64 | FQNP087 | 248.35  | 32.852   | 0     | 0 | 0 | 0  | 0 | 1  | 1  | 0 | 1  | 0 | 0.868  | 4.138  |
| 65 | FQNP088 | 368.37  | 204.391  | 1.062 | 0 | 0 | 2  | 0 | 4  | 2  | 0 | 0  | 0 | 3.488  | 4.749  |
| 66 | FQNP089 | 381.46  | 200.156  | 1.021 | 0 | 0 | 0  | 0 | 0  | 0  | 0 | 0  | 0 | 2.363  | 4.018  |
| 67 | FQNP090 | 270.36  | 73.874   | 1.415 | 0 | 0 | 0  | 0 | 1  | 0  | 0 | 0  | 0 | 1.83   | 3.875  |
| 68 | FQNP091 | 270.36  | 73.874   | 1.415 | 0 | 0 | 0  | 0 | 1  | 0  | 0 | 0  | 0 | 1.83   | 3.875  |
| 69 | FQNP092 | 256.33  | 68.062   | 1.427 | 0 | 0 | 0  | 0 | 1  | 0  | 0 | 0  | 0 | 1.586  | 3.860  |
| 70 | FQNP093 | 228.22  | 57.413   | 1.759 | 0 | 0 | 0  | 0 | 1  | 0  | 0 | 0  | 0 | 1.299  | 3.701  |
| 71 | FQNP094 | 506.64  | 639.103  | 1.685 | 0 | 0 | 0  | 0 | 2  | 1  | 0 | 0  | 0 | 5.637  | 4.086  |
| 72 | FQNP095 | 348.75  | 140.462  | 1.188 | 0 | 0 | 0  | 0 | 4  | 1  | 0 | 0  | 0 | 2.233  | 4.163  |
| 73 | FQNP105 | 394.45  | 172.17   | 1.051 | 0 | 0 | 0  | 0 | 0  | 0  | 0 | 1  | 0 | 2.644  | 3.890  |
| 74 | FQNP106 | 336.31  | 115.969  | 0.905 | 0 | 0 | 0  | 0 | 0  | 0  | 0 | 1  | 0 | 2.237  | 3.912  |
| 75 | FQNP107 | 382.34  | 135.316  | 0.9   | 0 | 0 | 0  | 0 | 1  | 1  | 0 | 0  | 0 | 2.198  | 3.941  |
| 76 | FQNP108 | 336.31  | 140.815  | 0.957 | 0 | 0 | 0  | 0 | 0  | 0  | 0 | 0  | 0 | 2.878  | 4.025  |
| 77 | FQNP109 | 284.28  | 160.088  | 0.788 | 0 | 0 | 0  | 0 | 2  | 0  | 0 | 0  | 0 | 2.78   | 4.337  |
| 78 | FQNP110 | 300.28  | 170.12   | 0.875 | 0 | 0 | 0  | 0 | 3  | 0  | 0 | 0  | 0 | 2.847  | 4.421  |
| 79 | FQNP112 | 344.34  | 201.768  | 1.02  | 0 | 0 | 0  | 0 | 2  | 1  | 0 | 0  | 0 | 3.05   | 4.062  |
| 80 | FQNP113 | 330.31  | 189.459  | 1.031 | 0 | 0 | 0  | 0 | 3  | 1  | 0 | 0  | 0 | 2.92   | 4.162  |
| 81 | FQNP114 | 262.33  | 64.764   | 1.425 | 0 | 0 | 0  | 0 | 1  | 1  | 0 | 0  | 0 | 1.422  | 3.651  |
| 82 | FQNP115 | 254.41  | 0        | 1     | 0 | 0 | 0  | 0 | 2  | 0  | 0 | 1  | 0 | 5.078  | 4.104  |

|     |         |        |         |       |   |   |   |   |   |   |   |   |   |        |       |
|-----|---------|--------|---------|-------|---|---|---|---|---|---|---|---|---|--------|-------|
| 83  | FQNP116 | 530.52 | 453.461 | 1.168 | 0 | 0 | 0 | 0 | 6 | 3 | 0 | 0 | 0 | 6.283  | 4.274 |
| 84  | FQNP119 | 540.5  | 662.017 | 0.96  | 0 | 0 | 0 | 0 | 6 | 0 | 0 | 2 | 0 | 4.777  | 4.847 |
| 85  | FQNP120 | 342.34 | 157.033 | 0.994 | 0 | 0 | 3 | 0 | 8 | 4 | 0 | 0 | 0 | 3.361  | 5.134 |
| 86  | FQNP121 | 528.95 | 179.831 | 1.378 | 0 | 0 | 0 | 0 | 1 | 0 | 0 | 0 | 0 | 14.694 | 4.272 |
| 87  | FQNP122 | 557.01 | 191.167 | 1.366 | 0 | 0 | 0 | 0 | 1 | 0 | 0 | 0 | 0 | 15.562 | 4.305 |
| 88  | FQNP123 | 585.07 | 202.538 | 1.356 | 0 | 0 | 0 | 0 | 1 | 0 | 0 | 0 | 0 | 16.423 | 4.337 |
| 89  | FQNP124 | 138.18 | 30.514  | 0     | 0 | 0 | 0 | 0 | 1 | 0 | 0 | 0 | 0 | 1.783  | 4.468 |
| 90  | FQNP125 | 122.13 | 26.324  | 0     | 0 | 0 | 0 | 0 | 1 | 0 | 0 | 0 | 0 | 1.544  | 4.460 |
| 91  | FQNP126 | 302.35 | 120.139 | 1.182 | 0 | 0 | 0 | 0 | 2 | 1 | 0 | 0 | 0 | 1.857  | 3.915 |
| 92  | FQNP127 | 300.33 | 120.139 | 1.182 | 0 | 0 | 0 | 0 | 2 | 1 | 0 | 0 | 0 | 1.857  | 3.915 |
| 93  | FQNP128 | 270.3  | 106.425 | 1.319 | 0 | 0 | 0 | 0 | 2 | 1 | 0 | 0 | 0 | 1.7    | 3.843 |
| 94  | FQNP129 | 274.34 | 139.317 | 0.742 | 0 | 0 | 0 | 0 | 2 | 1 | 0 | 0 | 0 | 4.117  | 4.175 |
| 95  | FQNP130 | 244.31 | 122.152 | 0.729 | 0 | 0 | 0 | 0 | 2 | 0 | 0 | 0 | 0 | 3.862  | 4.368 |
| 96  | FQNP131 | 358.37 | 208.04  | 0.862 | 0 | 0 | 1 | 0 | 1 | 1 | 0 | 0 | 0 | 2.814  | 4.348 |
| 97  | FQNP132 | 344.34 | 195.731 | 0.866 | 0 | 0 | 1 | 0 | 2 | 2 | 0 | 0 | 0 | 2.68   | 4.247 |
| 98  | FQNP133 | 710.95 | 787.218 | 0.937 | 0 | 0 | 0 | 0 | 3 | 1 | 0 | 0 | 0 | 4.01   | 4.572 |
| 99  | FQNP134 | 538.59 | 452.095 | 0.448 | 1 | 0 | 0 | 0 | 5 | 3 | 0 | 0 | 0 | 5.632  | 4.986 |
| 100 | FQNP135 | 538.59 | 452.691 | 0.441 | 1 | 0 | 0 | 0 | 4 | 2 | 0 | 0 | 0 | 5.45   | 5.074 |
| 101 | FQNP136 | 552.62 | 463.793 | 0.433 | 1 | 0 | 0 | 0 | 4 | 2 | 0 | 0 | 0 | 5.492  | 5.085 |
| 102 | FQNP137 | 594.57 | 478.798 | 0.994 | 0 | 0 | 3 | 0 | 8 | 5 | 0 | 0 | 0 | 5.466  | 5.167 |
| 103 | FQNP138 | 354.34 | 187.811 | 1.042 | 0 | 0 | 0 | 0 | 6 | 4 | 0 | 0 | 0 | 5.15   | 3.945 |
| 104 | FQNP139 | 578.57 | 618.478 | 0.879 | 0 | 0 | 3 | 0 | 8 | 5 | 0 | 0 | 0 | 4.087  | 5.263 |
| 105 | FQNP140 | 432.41 | 330.321 | 0.926 | 0 | 0 | 1 | 0 | 7 | 3 | 0 | 0 | 0 | 3.17   | 4.680 |
| 106 | FQNP141 | 454.76 | 185.141 | 0.533 | 0 | 0 | 0 | 0 | 1 | 0 | 0 | 2 | 0 | 4.232  | 4.174 |
| 107 | FQNP142 | 456.78 | 185.141 | 0.533 | 0 | 0 | 0 | 0 | 2 | 0 | 0 | 0 | 0 | 4.232  | 4.499 |
| 108 | FQNP143 | 426.8  | 223.217 | 0.66  | 0 | 0 | 0 | 0 | 1 | 0 | 0 | 0 | 0 | 2.246  | 4.301 |
| 109 | FQNP144 | 414.79 | 167.372 | 0.769 | 0 | 0 | 0 | 0 | 1 | 0 | 0 | 0 | 0 | 4.08   | 4.267 |
| 110 | FQNP145 | 218.32 | 56.795  | 1.143 | 0 | 0 | 0 | 0 | 0 | 0 | 0 | 0 | 0 | 2.878  | 3.895 |
| 111 | FQNP146 | 150.24 | 34.381  | 0     | 0 | 0 | 0 | 0 | 1 | 0 | 0 | 0 | 0 | 1.602  | 4.466 |

[illegible]

|     |         |        |         |       |   |   |   |   |   |   |   |   |   |       |       |
|-----|---------|--------|---------|-------|---|---|---|---|---|---|---|---|---|-------|-------|
| 141 | FQNP183 | 330.46 | 96.148  | 0.932 | 0 | 0 | 0 | 0 | 0 | 0 | 0 | 1 | 0 | 2.547 | 3.897 |
| 142 | FQNP184 | 328.44 | 96.148  | 0.932 | 0 | 0 | 0 | 0 | 0 | 0 | 0 | 0 | 0 | 2.547 | 4.002 |
| 143 | FQNP185 | 246.33 | 61.057  | 0.756 | 0 | 0 | 0 | 0 | 1 | 0 | 0 | 0 | 0 | 1.247 | 4.141 |
| 144 | FQNP186 | 330.41 | 96.006  | 0.83  | 0 | 0 | 0 | 0 | 1 | 0 | 0 | 0 | 0 | 2.591 | 4.162 |
| 145 | FQNP187 | 272.27 | 101.297 | 0.894 | 0 | 0 | 1 | 0 | 0 | 0 | 1 | 0 | 0 | 1.208 | 5.579 |
| 146 | FQNP188 | 304.32 | 115.007 | 0.802 | 0 | 0 | 1 | 0 | 1 | 0 | 0 | 0 | 0 | 1.061 | 4.481 |
| 147 | FQNP191 | 254.25 | 97.643  | 1.096 | 0 | 0 | 0 | 0 | 2 | 1 | 0 | 0 | 0 | 1.464 | 3.930 |
| 148 | FQNP192 | 346.31 | 89.966  | 1.133 | 0 | 0 | 2 | 0 | 1 | 0 | 1 | 0 | 0 | 1.397 | 5.920 |
| 149 | FQNP193 | 295.32 | 147.825 | 0.885 | 0 | 0 | 2 | 0 | 4 | 2 | 0 | 0 | 0 | 3.39  | 4.792 |
| 150 | FQNP194 | 290.29 | 158.057 | 0.889 | 0 | 0 | 0 | 0 | 5 | 1 | 0 | 0 | 0 | 2.637 | 4.429 |
| 151 | FQNP195 | 464.41 | 358.561 | 0.903 | 0 | 0 | 2 | 0 | 8 | 4 | 0 | 0 | 0 | 3.293 | 4.954 |
| 152 | FQNP196 | 464.41 | 358.561 | 0.903 | 0 | 0 | 2 | 0 | 8 | 4 | 0 | 0 | 0 | 3.293 | 4.954 |
| 153 | FQNP197 | 448.41 | 344.764 | 0.92  | 0 | 0 | 2 | 0 | 7 | 4 | 0 | 0 | 0 | 3.156 | 4.821 |
| 154 | FQNP198 | 568.52 | 614.71  | 0.974 | 0 | 0 | 2 | 0 | 7 | 4 | 0 | 0 | 0 | 5.105 | 5.000 |
| 155 | FQNP199 | 298.32 | 145.105 | 0.857 | 0 | 0 | 1 | 0 | 4 | 2 | 0 | 3 | 0 | 3.532 | 4.157 |
| 156 | FQNP200 | 286.31 | 135.944 | 0.989 | 0 | 0 | 1 | 0 | 4 | 1 | 0 | 0 | 0 | 3.326 | 4.608 |
| 157 | FQNP201 | 456.78 | 243.519 | 1.086 | 0 | 0 | 0 | 0 | 2 | 0 | 0 | 0 | 0 | 2.275 | 4.242 |
| 158 | FQNP202 | 428.77 | 223.896 | 1.023 | 0 | 0 | 0 | 0 | 2 | 0 | 0 | 0 | 0 | 2.209 | 4.256 |
| 159 | FQNP203 | 374.42 | 92.876  | 1.093 | 0 | 0 | 0 | 0 | 3 | 1 | 0 | 0 | 0 | 1.834 | 4.053 |
| 160 | FQNP204 | 356.4  | 89.5    | 1.115 | 0 | 0 | 0 | 0 | 2 | 1 | 0 | 0 | 0 | 1.903 | 3.928 |
| 161 | FQNP205 | 402.48 | 107.121 | 1.055 | 0 | 0 | 0 | 0 | 1 | 1 | 0 | 3 | 0 | 1.717 | 3.529 |
| 162 | FQNP206 | 360.44 | 93.257  | 1.083 | 0 | 0 | 0 | 0 | 3 | 2 | 0 | 2 | 0 | 1.91  | 3.645 |
| 163 | FQNP207 | 374.52 | 158.607 | 1.176 | 0 | 0 | 0 | 0 | 2 | 1 | 0 | 5 | 0 | 2.507 | 3.429 |
| 164 | FQNP208 | 340.4  | 85.377  | 1.2   | 0 | 0 | 0 | 0 | 1 | 1 | 0 | 0 | 0 | 1.905 | 3.774 |
| 165 | FQNP209 | 342.42 | 85.377  | 1.2   | 0 | 0 | 0 | 0 | 1 | 1 | 0 | 0 | 0 | 1.905 | 3.774 |
| 166 | FQNP210 | 342.42 | 89.565  | 1.1   | 0 | 0 | 0 | 0 | 1 | 0 | 0 | 0 | 0 | 1.986 | 4.025 |
| 167 | FQNP211 | 356.4  | 88.753  | 1.195 | 0 | 0 | 0 | 0 | 2 | 2 | 0 | 0 | 0 | 1.836 | 3.687 |
| 168 | FQNP212 | 362.46 | 173.725 | 1.006 | 0 | 0 | 1 | 0 | 3 | 2 | 0 | 0 | 0 | 1.676 | 4.263 |
| 169 | FQNP213 | 390.52 | 163.382 | 1.134 | 0 | 0 | 0 | 0 | 2 | 1 | 0 | 3 | 0 | 1.627 | 3.639 |

[illegible]

|     |         |        |         |       |   |   |   |   |   |   |   |   |   |       |       |
|-----|---------|--------|---------|-------|---|---|---|---|---|---|---|---|---|-------|-------|
| 199 | FQNP246 | 220.39 | 0       | 2.182 | 0 | 0 | 1 | 0 | 0 | 0 | 0 | 0 | 0 | 1.439 | 3.706 |
| 200 | FQNP247 | 270.3  | 77.645  | 0.565 | 0 | 0 | 0 | 0 | 0 | 0 | 0 | 0 | 0 | 2.938 | 4.162 |
| 201 | FQNP248 | 244.31 | 83.872  | 1.253 | 0 | 0 | 0 | 0 | 0 | 0 | 0 | 0 | 0 | 2.448 | 3.852 |
| 202 | FQNP249 | 216.2  | 53.167  | 0.938 | 0 | 0 | 0 | 0 | 0 | 0 | 0 | 0 | 0 | 1.341 | 3.945 |
| 203 | FQNP252 | 162.15 | 46.449  | 1.63  | 0 | 0 | 0 | 0 | 1 | 0 | 0 | 0 | 0 | 1.338 | 3.753 |
| 204 | FQNP253 | 304.32 | 90.115  | 0.891 | 0 | 0 | 0 | 0 | 2 | 1 | 0 | 0 | 0 | 3.382 | 4.063 |
| 205 | FQNP254 | 216.2  | 53.167  | 0.625 | 0 | 0 | 0 | 0 | 0 | 0 | 0 | 0 | 0 | 1.347 | 4.082 |
| 206 | FQNP255 | 192.18 | 58.909  | 1.138 | 0 | 0 | 0 | 0 | 1 | 0 | 0 | 0 | 0 | 1.553 | 3.980 |
| 207 | FQNP256 | 192.18 | 58.909  | 1.517 | 0 | 0 | 0 | 0 | 1 | 0 | 0 | 0 | 0 | 1.557 | 3.815 |
| 208 | FQNP257 | 302.3  | 101.823 | 1.251 | 0 | 0 | 0 | 0 | 5 | 3 | 0 | 0 | 0 | 1.848 | 3.811 |
| 209 | FQNP258 | 286.3  | 96.041  | 1.25  | 0 | 0 | 0 | 0 | 4 | 1 | 0 | 0 | 0 | 1.797 | 4.099 |
| 210 | FQNP259 | 180.17 | 43.841  | 1.857 | 0 | 0 | 0 | 0 | 3 | 1 | 0 | 0 | 0 | 2.91  | 3.717 |
| 211 | FQNP260 | 184.16 | 42.676  | 0.78  | 0 | 0 | 0 | 0 | 3 | 2 | 0 | 0 | 0 | 1.949 | 3.960 |
| 212 | FQNP261 | 170.13 | 38.248  | 0     | 1 | 0 | 0 | 0 | 4 | 2 | 0 | 0 | 0 | 1.623 | 4.935 |
| 213 | FQNP262 | 126.12 | 26      | 0     | 0 | 0 | 0 | 0 | 3 | 0 | 0 | 0 | 0 | 0.95  | 4.674 |
| 214 | FQNP263 | 164.17 | 39.975  | 2.037 | 0 | 0 | 0 | 0 | 2 | 0 | 0 | 0 | 0 | 2.95  | 3.725 |
| 215 | FQNP265 | 472.78 | 253.777 | 1.002 | 0 | 0 | 0 | 0 | 3 | 0 | 0 | 0 | 0 | 2.352 | 4.401 |
| 216 | FQNP266 | 168.16 | 38.571  | 0     | 1 | 0 | 0 | 0 | 2 | 1 | 0 | 0 | 0 | 1.469 | 4.905 |
| 217 | FQNP267 | 152.16 | 34.705  | 0     | 1 | 0 | 0 | 0 | 1 | 0 | 0 | 0 | 0 | 1.602 | 4.995 |
| 218 | FQNP268 | 468.84 | 258.649 | 0.662 | 0 | 0 | 0 | 0 | 0 | 0 | 0 | 3 | 0 | 2.576 | 3.898 |
| 219 | FQNP269 | 426.8  | 224.18  | 1.033 | 0 | 0 | 0 | 0 | 0 | 0 | 0 | 3 | 0 | 2.167 | 3.705 |
| 220 | FQNP270 | 440.78 | 235.134 | 1.323 | 0 | 0 | 0 | 0 | 0 | 0 | 0 | 3 | 0 | 2.187 | 3.585 |
| 221 | FQNP271 | 442.8  | 235.134 | 1.323 | 0 | 0 | 0 | 0 | 1 | 0 | 0 | 3 | 0 | 2.187 | 3.700 |
| 222 | FQNP273 | 576.95 | 375.158 | 0.64  | 0 | 0 | 2 | 0 | 4 | 2 | 0 | 0 | 0 | 5.141 | 5.073 |
| 223 | FQNP274 | 290.29 | 158.057 | 0.889 | 0 | 0 | 0 | 0 | 5 | 1 | 0 | 0 | 0 | 2.637 | 4.429 |
| 224 | FQNP275 | 454.86 | 174.078 | 0.75  | 0 | 0 | 0 | 0 | 1 | 0 | 0 | 0 | 0 | 3.868 | 4.274 |
| 225 | FQNP276 | 452.84 | 174.078 | 0.75  | 0 | 0 | 0 | 0 | 0 | 0 | 0 | 2 | 0 | 3.868 | 3.948 |
| 226 | FQNP278 | 304.37 | 157.395 | 0.755 | 0 | 0 | 0 | 0 | 2 | 1 | 0 | 0 | 0 | 4.22  | 4.182 |
| 227 | FQNP279 | 314.36 | 126.626 | 0.969 | 0 | 0 | 0 | 0 | 1 | 0 | 0 | 0 | 0 | 1.632 | 4.095 |



|     |         |        |         |       |   |   |   |   |    |   |   |    |   |       |       |
|-----|---------|--------|---------|-------|---|---|---|---|----|---|---|----|---|-------|-------|
| 228 | FQNP280 | 272.32 | 106.02  | 1.319 | 0 | 0 | 0 | 0 | 2  | 1 | 0 | 0  | 0 | 1.71  | 3.843 |
| 229 | FQNP281 | 454.86 | 174.803 | 1.076 | 0 | 0 | 1 | 0 | 0  | 0 | 0 | 0  | 0 | 3.844 | 4.350 |
| 230 | FQNP282 | 585.01 | 389.689 | 1.001 | 0 | 0 | 0 | 0 | 1  | 0 | 0 | 1  | 0 | 4.941 | 4.209 |
| 231 | FQNP283 | 440.83 | 174.693 | 0.727 | 0 | 0 | 0 | 0 | 1  | 0 | 0 | 0  | 0 | 3.716 | 4.280 |
| 232 | FQNP284 | 454.86 | 183.434 | 0.717 | 0 | 0 | 0 | 0 | 1  | 0 | 0 | 0  | 0 | 3.936 | 4.295 |
| 233 | FQNP285 | 404.37 | 180.983 | 0.757 | 0 | 0 | 0 | 0 | 2  | 0 | 0 | 0  | 0 | 1.929 | 4.341 |
| 234 | FQNP286 | 369.93 | 169.52  | 0.75  | 0 | 0 | 0 | 0 | 2  | 1 | 0 | 0  | 0 | 1.825 | 4.132 |
| 235 | FQNP287 | 302.5  | 173.691 | 1.155 | 0 | 0 | 0 | 0 | 1  | 0 | 0 | 0  | 0 | 1.7   | 4.042 |
| 236 | FQNP288 | 218.37 | 57.922  | 0.667 | 0 | 0 | 0 | 0 | 1  | 0 | 0 | 0  | 0 | 3.825 | 4.243 |
| 237 | FQNP289 | 234.37 | 60.604  | 0.971 | 0 | 0 | 1 | 0 | 1  | 0 | 0 | 0  | 0 | 3.891 | 4.446 |
| 238 | FQNP290 | 252.39 | 67.55   | 1.063 | 0 | 0 | 0 | 0 | 3  | 0 | 0 | 0  | 0 | 4.156 | 4.312 |
| 239 | FQNP291 | 560.71 | 440.654 | 0.966 | 0 | 0 | 4 | 0 | 8  | 4 | 0 | 0  | 0 | 5.474 | 5.695 |
| 240 | FQNP292 | 560.54 | 515.161 | 0.801 | 0 | 0 | 0 | 0 | 8  | 1 | 0 | 0  | 0 | 2.939 | 5.023 |
| 241 | FQNP293 | 814.79 | 978.98  | 0.809 | 0 | 0 | 0 | 0 | 10 | 1 | 0 | 0  | 0 | 3.214 | 5.521 |
| 242 | FQNP294 | 707.91 | 0       | 0.7   | 0 | 0 | 0 | 0 | 9  | 1 | 0 | 10 | 0 | 6.403 | 3.920 |
| 243 | FQNP295 | 302.35 | 123.419 | 0.679 | 0 | 0 | 0 | 0 | 1  | 1 | 0 | 1  | 0 | 1.847 | 3.917 |
| 244 | FQNP296 | 332.38 | 136.113 | 0.977 | 0 | 0 | 0 | 0 | 1  | 1 | 0 | 1  | 0 | 1.696 | 3.790 |
| 245 | FQNP297 | 288.32 | 115.575 | 0.716 | 0 | 0 | 0 | 0 | 1  | 1 | 0 | 2  | 0 | 1.779 | 3.789 |
| 246 | FQNP298 | 318.35 | 128.269 | 0.96  | 0 | 0 | 0 | 0 | 1  | 1 | 0 | 2  | 0 | 1.634 | 3.686 |
| 247 | FQNP299 | 302.35 | 123.419 | 0.679 | 0 | 0 | 0 | 0 | 1  | 1 | 0 | 1  | 0 | 1.847 | 3.917 |
| 248 | FQNP300 | 332.38 | 136.113 | 0.977 | 0 | 0 | 0 | 0 | 1  | 1 | 0 | 1  | 0 | 1.696 | 3.790 |
| 249 | FQNP301 | 300.33 | 123.419 | 0.679 | 0 | 0 | 0 | 0 | 1  | 1 | 0 | 0  | 0 | 1.847 | 4.022 |
| 250 | FQNP302 | 286.3  | 115.575 | 0.716 | 0 | 0 | 0 | 0 | 1  | 1 | 0 | 0  | 0 | 1.779 | 4.000 |
| 251 | FQNP303 | 392.68 | 158.183 | 0.784 | 0 | 0 | 0 | 0 | 0  | 0 | 0 | 2  | 0 | 3.831 | 3.923 |
| 252 | FQNP304 | 250.27 | 80.687  | 0.942 | 0 | 0 | 1 | 0 | 2  | 1 | 1 | 0  | 0 | 1.546 | 5.580 |
| 253 | FQNP307 | 554.53 | 681.752 | 0.962 | 0 | 0 | 0 | 0 | 5  | 0 | 0 | 2  | 0 | 4.884 | 4.745 |
| 254 | FQNP310 | 288.37 | 147.646 | 0.686 | 0 | 0 | 0 | 0 | 1  | 1 | 0 | 0  | 0 | 4.174 | 4.091 |
| 255 | FQNP311 | 302.4  | 156.888 | 0.675 | 0 | 0 | 0 | 0 | 0  | 0 | 0 | 0  | 0 | 4.278 | 4.192 |
| 256 | FQNP312 | 244.31 | 123.143 | 0.729 | 0 | 0 | 0 | 0 | 2  | 0 | 0 | 0  | 0 | 3.887 | 4.369 |

|     |         |         |          |       |   |   |    |   |    |    |   |   |   |       |       |
|-----|---------|---------|----------|-------|---|---|----|---|----|----|---|---|---|-------|-------|
| 257 | FQNP313 | 258.34  | 130.481  | 0.712 | 0 | 0 | 0  | 0 | 1  | 0  | 0 | 0 | 0 | 4.045 | 4.270 |
| 258 | FQNP314 | 230.28  | 113.823  | 0.747 | 0 | 0 | 0  | 0 | 3  | 0  | 0 | 0 | 0 | 3.78  | 4.468 |
| 259 | FQNP315 | 230.28  | 114.814  | 0.747 | 0 | 0 | 0  | 0 | 3  | 0  | 0 | 0 | 0 | 3.806 | 4.469 |
| 260 | FQNP316 | 272.32  | 107.638  | 1.397 | 0 | 0 | 0  | 0 | 2  | 1  | 0 | 0 | 0 | 1.779 | 3.812 |
| 261 | FQNP317 | 270.25  | 147.779  | 0.8   | 0 | 0 | 0  | 0 | 3  | 0  | 0 | 0 | 0 | 2.547 | 4.433 |
| 262 | FQNP318 | 300.33  | 118.116  | 1.045 | 0 | 0 | 0  | 0 | 2  | 1  | 0 | 0 | 0 | 1.59  | 3.967 |
| 263 | FQNP319 | 432.41  | 351.825  | 0.949 | 0 | 0 | 1  | 0 | 7  | 4  | 0 | 0 | 0 | 3.44  | 4.486 |
| 264 | FQNP321 | 292.41  | 38.703   | 0.772 | 0 | 0 | 0  | 0 | 1  | 0  | 0 | 0 | 0 | 1.769 | 4.135 |
| 265 | FQNP322 | 138.18  | 30.752   | 2.813 | 0 | 0 | 0  | 0 | 2  | 0  | 0 | 0 | 0 | 2.063 | 3.358 |
| 266 | FQNP323 | 268.26  | 44.396   | 1.096 | 0 | 0 | 1  | 1 | 4  | 2  | 0 | 0 | 1 | 2.535 | 3.670 |
| 267 | FQNP324 | 396.72  | 158.183  | 0.784 | 0 | 0 | 0  | 0 | 1  | 0  | 0 | 0 | 0 | 3.831 | 4.249 |
| 268 | FQNP330 | 1151.41 | 1669.117 | 0.921 | 0 | 0 | 11 | 0 | 16 | 9  | 0 | 2 | 0 | 8.266 | 8.511 |
| 269 | FQNP331 | 1179.47 | 1715.713 | 0.923 | 0 | 0 | 11 | 0 | 16 | 9  | 0 | 2 | 0 | 8.347 | 8.539 |
| 270 | FQNP332 | 869.18  | 889.623  | 0.957 | 0 | 0 | 7  | 0 | 10 | 5  | 0 | 2 | 0 | 8.006 | 6.834 |
| 271 | FQNP333 | 1035.28 | 1396.119 | 0.967 | 0 | 0 | 10 | 0 | 14 | 8  | 0 | 2 | 0 | 8.601 | 7.984 |
| 272 | FQNP334 | 1165.44 | 1695.422 | 0.921 | 0 | 0 | 11 | 0 | 15 | 10 | 0 | 2 | 0 | 8.575 | 8.216 |
| 273 | FQNP335 | 1193.5  | 1742.017 | 0.923 | 0 | 0 | 11 | 0 | 15 | 9  | 0 | 2 | 0 | 8.623 | 8.446 |
| 274 | FQNP340 | 330.36  | 136.113  | 0.977 | 0 | 0 | 0  | 0 | 1  | 1  | 0 | 0 | 0 | 1.696 | 3.895 |
| 275 | FQNP341 | 316.33  | 128.269  | 0.96  | 0 | 0 | 0  | 0 | 1  | 1  | 0 | 0 | 0 | 1.634 | 3.897 |
| 276 | FQNP342 | 270.25  | 105.488  | 1.043 | 0 | 0 | 0  | 0 | 3  | 1  | 0 | 0 | 0 | 1.542 | 4.074 |
| 277 | FQNP343 | 250.27  | 80.687   | 0.942 | 0 | 0 | 1  | 0 | 2  | 1  | 1 | 0 | 0 | 1.546 | 5.580 |
| 278 | FQNP344 | 152.16  | 34.943   | 0     | 0 | 0 | 0  | 0 | 1  | 0  | 0 | 0 | 0 | 2.041 | 4.477 |
| 279 | FQNP345 | 466.87  | 183.44   | 0.739 | 0 | 0 | 0  | 0 | 0  | 0  | 0 | 2 | 0 | 4.141 | 3.965 |
| 280 | FQNP346 | 468.84  | 180.147  | 0.746 | 0 | 0 | 0  | 0 | 0  | 0  | 0 | 0 | 0 | 3.694 | 4.160 |
| 281 | FQNP347 | 438.81  | 165.605  | 0.762 | 0 | 0 | 0  | 0 | 0  | 0  | 0 | 2 | 0 | 3.647 | 3.933 |
| 282 | FQNP348 | 440.83  | 165.605  | 0.762 | 0 | 0 | 0  | 0 | 1  | 0  | 0 | 0 | 0 | 3.647 | 4.258 |
| 283 | FQNP349 | 482.87  | 187.726  | 0.736 | 0 | 0 | 0  | 0 | 0  | 0  | 0 | 3 | 0 | 3.743 | 3.854 |
| 284 | FQNP350 | 360.39  | 154.53   | 1.116 | 0 | 0 | 0  | 0 | 0  | 0  | 0 | 5 | 0 | 1.931 | 3.413 |
| 285 | FQNP351 | 332.38  | 137.144  | 1.114 | 0 | 0 | 0  | 0 | 1  | 0  | 0 | 1 | 0 | 2.409 | 3.952 |



|     |         |        |         |       |   |   |   |   |   |   |   |   |   |        |       |
|-----|---------|--------|---------|-------|---|---|---|---|---|---|---|---|---|--------|-------|
| 315 | FQNP387 | 370.43 | 137.372 | 1.229 | 0 | 0 | 2 | 0 | 1 | 1 | 0 | 0 | 0 | 3.699  | 4.502 |
| 316 | FQNP388 | 414.44 | 132.901 | 0.942 | 0 | 0 | 2 | 0 | 0 | 0 | 0 | 0 | 0 | 3.812  | 4.717 |
| 317 | FQNP389 | 274.29 | 137.479 | 0.603 | 0 | 0 | 0 | 0 | 3 | 1 | 0 | 0 | 0 | 3.627  | 4.337 |
| 318 | FQNP390 | 468.44 | 395.379 | 0.508 | 1 | 0 | 0 | 0 | 5 | 3 | 0 | 0 | 0 | 5.736  | 4.930 |
| 319 | FQNP391 | 210.2  | 50.733  | 0.3   | 0 | 0 | 0 | 0 | 2 | 2 | 0 | 0 | 0 | 1.807  | 4.057 |
| 320 | FQNP392 | 286.3  | 116.827 | 0.875 | 0 | 0 | 0 | 0 | 1 | 0 | 0 | 0 | 0 | 1.9    | 4.137 |
| 321 | FQNP393 | 182.19 | 42.676  | 0     | 0 | 0 | 0 | 0 | 2 | 1 | 0 | 0 | 0 | 1.806  | 4.387 |
| 322 | FQNP394 | 124.15 | 26      | 0     | 0 | 0 | 0 | 0 | 2 | 0 | 0 | 0 | 0 | 0.95   | 4.560 |
| 323 | FQNP395 | 212.32 | 0       | 1.167 | 0 | 0 | 0 | 0 | 1 | 0 | 0 | 2 | 0 | 1.8    | 3.729 |
| 324 | FQNP396 | 228.32 | 0       | 1.136 | 0 | 0 | 0 | 0 | 2 | 1 | 0 | 2 | 0 | 1.688  | 3.651 |
| 325 | FQNP397 | 244.32 | 0       | 1.133 | 0 | 0 | 0 | 0 | 3 | 1 | 0 | 0 | 0 | 1.667  | 3.978 |
| 326 | FQNP398 | 260.41 | 0       | 1.078 | 0 | 0 | 0 | 0 | 2 | 0 | 0 | 0 | 0 | 6.774  | 4.218 |
| 327 | FQNP400 | 300.33 | 119.85  | 1.087 | 0 | 0 | 0 | 0 | 2 | 1 | 0 | 0 | 0 | 1.641  | 3.951 |
| 328 | FQNP402 | 338.43 | 143.089 | 1.152 | 0 | 0 | 1 | 0 | 1 | 0 | 0 | 0 | 0 | 2.288  | 4.374 |
| 329 | FQNP403 | 298.36 | 163.337 | 1.283 | 0 | 0 | 0 | 0 | 2 | 2 | 0 | 4 | 0 | 4.811  | 3.344 |
| 330 | FQNP404 | 232.35 | 61.406  | 1.007 | 0 | 0 | 0 | 0 | 0 | 0 | 0 | 0 | 0 | 3.047  | 3.962 |
| 331 | FQNP405 | 362.46 | 105.103 | 1.069 | 0 | 0 | 0 | 0 | 2 | 0 | 0 | 0 | 0 | 3.626  | 4.203 |
| 332 | FQNP406 | 280.35 | 76.266  | 1.086 | 0 | 0 | 0 | 0 | 3 | 2 | 0 | 0 | 0 | 3.797  | 3.891 |
| 333 | FQNP407 | 262.33 | 68.43   | 0.991 | 0 | 0 | 1 | 0 | 1 | 0 | 0 | 0 | 0 | 3.09   | 4.422 |
| 334 | FQNP408 | 304.37 | 82.552  | 0.996 | 0 | 0 | 1 | 0 | 0 | 0 | 0 | 3 | 0 | 3.596  | 4.010 |
| 335 | FQNP409 | 322.39 | 90.388  | 1.04  | 0 | 0 | 0 | 0 | 2 | 2 | 0 | 3 | 0 | 3.429  | 3.480 |
| 336 | FQNP418 | 152.16 | 35.181  | 2.292 | 0 | 0 | 0 | 0 | 2 | 0 | 0 | 2 | 0 | 2.349  | 3.385 |
| 337 | FQNP419 | 284.28 | 114.56  | 1.193 | 0 | 0 | 0 | 0 | 1 | 0 | 0 | 0 | 0 | 2.034  | 4.000 |
| 338 | FQNP424 | 166.19 | 39.792  | 1.467 | 0 | 0 | 0 | 0 | 1 | 0 | 0 | 2 | 0 | 2.678  | 3.643 |
| 339 | FQNP425 | 248.35 | 83.447  | 1.36  | 0 | 0 | 0 | 0 | 1 | 0 | 0 | 2 | 0 | 2.132  | 3.701 |
| 340 | FQNP426 | 238.41 | 0       | 3.4   | 0 | 0 | 0 | 0 | 2 | 0 | 0 | 0 | 0 | 1.35   | 3.066 |
| 341 | FQNP428 | 366.7  | 0       | 0.677 | 0 | 0 | 0 | 0 | 0 | 0 | 0 | 2 | 0 | 10.179 | 4.038 |
| 342 | FQNP429 | 380.73 | 0       | 0.669 | 0 | 0 | 0 | 0 | 0 | 0 | 0 | 2 | 0 | 10.607 | 4.052 |
| 343 | FQNP430 | 394.76 | 0       | 0.661 | 0 | 0 | 0 | 0 | 0 | 0 | 0 | 2 | 0 | 11.033 | 4.066 |

|     |         |        |         |       |   |   |   |   |   |   |   |   |   |        |       |
|-----|---------|--------|---------|-------|---|---|---|---|---|---|---|---|---|--------|-------|
| 344 | FQNP431 | 408.79 | 0       | 0.654 | 0 | 0 | 0 | 0 | 0 | 0 | 0 | 2 | 0 | 11.458 | 4.080 |
| 345 | FQNP432 | 422.82 | 0       | 0.647 | 0 | 0 | 0 | 0 | 0 | 0 | 0 | 2 | 0 | 11.881 | 4.093 |
| 346 | FQNP433 | 436.85 | 0       | 0.641 | 0 | 0 | 0 | 0 | 0 | 0 | 0 | 2 | 0 | 12.302 | 4.106 |
| 347 | FQNP434 | 450.88 | 0       | 0.636 | 0 | 0 | 0 | 0 | 0 | 0 | 0 | 2 | 0 | 12.722 | 4.119 |
| 348 | FQNP435 | 260.31 | 66.799  | 1.425 | 0 | 0 | 0 | 0 | 1 | 1 | 0 | 2 | 0 | 1.58   | 3.446 |
| 349 | FQNP436 | 170.18 | 0       | 0     | 0 | 0 | 1 | 0 | 1 | 0 | 0 | 0 | 0 | 1.461  | 4.776 |
| 350 | FQNP437 | 288.32 | 148.231 | 0.729 | 0 | 0 | 0 | 0 | 1 | 0 | 0 | 0 | 0 | 4.167  | 4.276 |
| 351 | FQNP438 | 258.29 | 132.485 | 0.713 | 0 | 0 | 0 | 0 | 1 | 1 | 0 | 0 | 0 | 4.167  | 4.070 |
| 352 | FQNP439 | 272.32 | 140.226 | 0.699 | 0 | 0 | 0 | 0 | 0 | 0 | 0 | 0 | 0 | 3.951  | 4.164 |
| 353 | FQNP440 | 288.32 | 148.955 | 0.926 | 0 | 0 | 0 | 0 | 1 | 1 | 0 | 0 | 0 | 4.378  | 3.992 |
| 354 | FQNP441 | 258.29 | 132.485 | 0.76  | 0 | 0 | 0 | 0 | 1 | 1 | 0 | 0 | 0 | 3.972  | 4.045 |
| 355 | FQNP442 | 302.35 | 156.697 | 1.112 | 0 | 0 | 0 | 0 | 0 | 0 | 0 | 0 | 0 | 3.916  | 3.992 |
| 356 | FQNP443 | 288.32 | 148.955 | 1.105 | 0 | 0 | 0 | 0 | 1 | 1 | 0 | 0 | 0 | 3.982  | 3.903 |
| 357 | FQNP444 | 302.35 | 156.697 | 0.858 | 0 | 0 | 0 | 0 | 0 | 0 | 0 | 0 | 0 | 4.388  | 4.115 |
| 358 | FQNP448 | 516.74 | 210.886 | 1.114 | 0 | 0 | 0 | 0 | 3 | 0 | 0 | 0 | 0 | 2.05   | 4.320 |
| 359 | FQNP449 | 574.78 | 242.922 | 1.046 | 0 | 0 | 0 | 0 | 3 | 1 | 0 | 3 | 0 | 2.075  | 3.849 |
| 360 | FQNP450 | 532.74 | 217.92  | 1.112 | 0 | 0 | 0 | 0 | 4 | 2 | 0 | 0 | 0 | 2.037  | 4.032 |
| 361 | FQNP451 | 574.78 | 239.868 | 1.106 | 0 | 0 | 0 | 0 | 3 | 1 | 0 | 3 | 0 | 1.971  | 3.818 |
| 362 | FQNP452 | 516.74 | 210.886 | 1.114 | 0 | 0 | 0 | 0 | 3 | 1 | 0 | 0 | 0 | 2.05   | 4.116 |
| 363 | FQNP453 | 574.78 | 242.922 | 1.046 | 0 | 0 | 0 | 0 | 3 | 2 | 0 | 3 | 0 | 2.075  | 3.645 |
| 364 | FQNP454 | 532.74 | 217.92  | 1.112 | 0 | 0 | 0 | 0 | 4 | 3 | 0 | 0 | 0 | 2.037  | 3.829 |
| 365 | FQNP455 | 574.78 | 239.868 | 1.106 | 0 | 0 | 0 | 0 | 3 | 1 | 0 | 3 | 0 | 1.971  | 3.818 |
| 366 | FQNP456 | 516.74 | 210.886 | 1.114 | 0 | 0 | 0 | 0 | 3 | 1 | 0 | 0 | 0 | 2.05   | 4.116 |
| 367 | FQNP457 | 304.47 | 67.283  | 0.76  | 0 | 0 | 0 | 0 | 0 | 0 | 0 | 5 | 0 | 7.31   | 3.653 |
| 368 | FQNP458 | 332.53 | 76.826  | 0.73  | 0 | 0 | 0 | 0 | 0 | 0 | 0 | 5 | 0 | 8.309  | 3.696 |
| 369 | FQNP459 | 360.59 | 86.574  | 0.707 | 0 | 0 | 0 | 0 | 0 | 0 | 0 | 5 | 0 | 9.279  | 3.736 |
| 370 | FQNP460 | 388.65 | 96.494  | 0.687 | 0 | 0 | 0 | 0 | 0 | 0 | 0 | 5 | 0 | 10.225 | 3.774 |
| 371 | FQNP461 | 330.51 | 76.826  | 0.73  | 0 | 0 | 0 | 0 | 0 | 0 | 0 | 5 | 0 | 8.309  | 3.696 |
| 372 | FQNP462 | 358.57 | 86.574  | 0.707 | 0 | 0 | 0 | 0 | 0 | 0 | 0 | 5 | 0 | 9.279  | 3.736 |



|     |         |         |          |       |   |   |    |   |    |   |   |   |   |       |       |
|-----|---------|---------|----------|-------|---|---|----|---|----|---|---|---|---|-------|-------|
| 402 | FQNP503 | 370.43  | 139.8    | 1.182 | 0 | 0 | 2  | 0 | 0  | 0 | 0 | 0 | 0 | 3.791 | 4.615 |
| 403 | FQNP504 | 220.39  | 0        | 2.182 | 0 | 0 | 1  | 0 | 0  | 0 | 0 | 0 | 0 | 1.439 | 3.706 |
| 404 | FQNP505 | 223.4   | 0        | 0.845 | 0 | 0 | 0  | 0 | 1  | 0 | 0 | 0 | 0 | 5.769 | 4.180 |
| 405 | FQNP506 | 1199.65 | 1656.598 | 1.024 | 0 | 0 | 10 | 0 | 10 | 7 | 0 | 4 | 0 | 8.71  | 7.644 |
| 406 | FQNP507 | 1223.67 | 1189.333 | 1.054 | 0 | 0 | 10 | 0 | 8  | 6 | 0 | 5 | 0 | 5.649 | 7.156 |
| 407 | FQNP508 | 306.54  | 43.844   | 0.963 | 0 | 0 | 0  | 0 | 2  | 0 | 0 | 0 | 0 | 1.648 | 4.166 |
| 408 | FQNP509 | 348.58  | 54.411   | 0.866 | 0 | 0 | 0  | 0 | 1  | 0 | 0 | 3 | 0 | 2.614 | 3.807 |
| 409 | FQNP510 | 272.52  | 38.593   | 0     | 0 | 0 | 0  | 0 | 0  | 0 | 0 | 0 | 0 | 1.514 | 4.351 |
| 410 | FQNP511 | 272.52  | 38.593   | 0     | 0 | 0 | 0  | 0 | 0  | 0 | 0 | 0 | 0 | 1.514 | 4.351 |
| 411 | FQNP512 | 272.52  | 38.593   | 0     | 0 | 0 | 0  | 0 | 0  | 0 | 0 | 0 | 0 | 1.514 | 4.351 |
| 412 | FQNP513 | 230.33  | 56.674   | 1.007 | 0 | 0 | 0  | 0 | 1  | 1 | 0 | 0 | 0 | 1.318 | 3.827 |
| 413 | FQNP514 | 246.33  | 61.057   | 0.756 | 0 | 0 | 0  | 0 | 1  | 0 | 0 | 0 | 0 | 1.247 | 4.141 |
| 414 | FQNP517 | 531.76  | 75.315   | 1.165 | 0 | 0 | 0  | 0 | 2  | 0 | 0 | 4 | 0 | 2.911 | 3.705 |
| 415 | FQNP518 | 517.73  | 73.202   | 1.134 | 0 | 0 | 0  | 0 | 2  | 0 | 0 | 4 | 0 | 2.978 | 3.719 |
| 416 | FQNP519 | 533.73  | 75.65    | 1.084 | 0 | 0 | 0  | 0 | 3  | 0 | 0 | 3 | 0 | 2.96  | 3.962 |
| 417 | FQNP520 | 434.48  | 59.269   | 0.884 | 0 | 0 | 1  | 0 | 2  | 0 | 0 | 5 | 0 | 1.761 | 4.019 |
| 418 | FQNP521 | 474.5   | 65.611   | 0.827 | 0 | 0 | 2  | 0 | 0  | 0 | 0 | 8 | 0 | 2.4   | 3.851 |
| 419 | FQNP522 | 432.46  | 56.312   | 0.922 | 0 | 0 | 3  | 0 | 0  | 0 | 0 | 5 | 0 | 1.702 | 4.436 |
| 420 | FQNP523 | 344.44  | 0        | 0.83  | 0 | 0 | 1  | 0 | 0  | 0 | 0 | 2 | 0 | 1.667 | 4.093 |
| 421 | FQNP524 | 312.44  | 0        | 0.862 | 0 | 0 | 0  | 0 | 0  | 0 | 0 | 2 | 0 | 1.568 | 3.743 |
| 422 | FQNP527 | 178.15  | 52.369   | 1.625 | 0 | 0 | 0  | 0 | 2  | 0 | 0 | 0 | 0 | 1.384 | 3.874 |
| 423 | FQNP530 | 332.28  | 186.472  | 0.967 | 0 | 0 | 0  | 0 | 5  | 3 | 0 | 0 | 0 | 2.648 | 4.004 |
| 424 | FQNP531 | 318.25  | 175.657  | 0.892 | 0 | 0 | 0  | 0 | 6  | 4 | 0 | 0 | 0 | 2.59  | 3.940 |
| 425 | FQNP533 | 204.19  | 63.096   | 1.364 | 0 | 0 | 0  | 0 | 1  | 1 | 0 | 3 | 0 | 1.52  | 3.363 |
| 426 | FQNP535 | 218.22  | 71.989   | 1     | 0 | 0 | 0  | 0 | 0  | 0 | 0 | 3 | 0 | 1.659 | 3.620 |
| 427 | FQNP536 | 560.9   | 237.694  | 1.147 | 0 | 0 | 0  | 0 | 2  | 0 | 0 | 7 | 0 | 4.453 | 3.528 |
| 428 | FQNP537 | 574.78  | 244.195  | 1.183 | 0 | 0 | 0  | 0 | 4  | 0 | 0 | 5 | 0 | 4.401 | 3.955 |
| 429 | FQNP538 | 652.91  | 412.194  | 0.956 | 0 | 0 | 2  | 0 | 7  | 3 | 0 | 5 | 0 | 4.444 | 4.552 |
| 430 | FQNP539 | 460.47  | 352.603  | 0.934 | 0 | 0 | 1  | 0 | 6  | 3 | 0 | 2 | 0 | 3.689 | 4.377 |

|     |         |         |          |       |   |   |    |   |   |   |   |   |   |       |       |
|-----|---------|---------|----------|-------|---|---|----|---|---|---|---|---|---|-------|-------|
| 431 | FQNP540 | 460.47  | 352.603  | 0.934 | 0 | 0 | 1  | 0 | 6 | 3 | 0 | 2 | 0 | 3.689 | 4.377 |
| 432 | FQNP541 | 446.44  | 339.588  | 0.966 | 0 | 0 | 1  | 0 | 7 | 3 | 0 | 2 | 0 | 3.797 | 4.473 |
| 433 | FQNP542 | 512.56  | 409.063  | 0.805 | 0 | 0 | 3  | 0 | 6 | 2 | 1 | 2 | 1 | 4.621 | 6.430 |
| 434 | FQNP543 | 290.34  | 80.673   | 1.074 | 0 | 0 | 0  | 0 | 1 | 0 | 0 | 0 | 0 | 2.018 | 4.032 |
| 435 | FQNP544 | 372.45  | 122.65   | 1.035 | 0 | 0 | 0  | 0 | 0 | 0 | 0 | 0 | 0 | 3.639 | 3.999 |
| 436 | FQNP546 | 302.5   | 0        | 0.78  | 0 | 0 | 1  | 0 | 0 | 0 | 0 | 2 | 0 | 1.754 | 4.117 |
| 437 | FQNP547 | 302.5   | 0        | 0.78  | 0 | 0 | 1  | 0 | 0 | 0 | 0 | 2 | 0 | 1.754 | 4.117 |
| 438 | FQNP548 | 446.49  | 61.383   | 0.86  | 0 | 0 | 2  | 0 | 0 | 0 | 0 | 5 | 0 | 1.996 | 4.140 |
| 439 | FQNP549 | 434.48  | 59.269   | 0.884 | 0 | 0 | 1  | 0 | 2 | 1 | 0 | 5 | 0 | 1.761 | 3.815 |
| 440 | FQNP550 | 328.44  | 0        | 0.883 | 0 | 0 | 0  | 0 | 0 | 0 | 0 | 2 | 0 | 1.689 | 3.736 |
| 441 | FQNP551 | 416.46  | 54.202   | 0.858 | 0 | 0 | 2  | 0 | 0 | 0 | 0 | 5 | 0 | 1.756 | 4.131 |
| 442 | FQNP552 | 279.49  | 87.419   | 2.021 | 0 | 0 | 0  | 0 | 1 | 0 | 0 | 0 | 0 | 1.885 | 3.618 |
| 443 | FQNP553 | 295.49  | 93.959   | 1.729 | 0 | 0 | 0  | 0 | 1 | 0 | 0 | 0 | 0 | 1.908 | 3.751 |
| 444 | FQNP554 | 302.36  | 106.192  | 1.753 | 0 | 0 | 5  | 0 | 2 | 1 | 0 | 0 | 0 | 1.027 | 5.304 |
| 445 | FQNP556 | 302.35  | 172.423  | 0.988 | 0 | 0 | 0  | 0 | 2 | 1 | 0 | 0 | 0 | 2.838 | 4.054 |
| 446 | FQNP557 | 352.41  | 136.173  | 1.004 | 0 | 0 | 0  | 0 | 2 | 0 | 0 | 0 | 0 | 2.638 | 4.225 |
| 447 | FQNP558 | 272.32  | 152.916  | 1.048 | 0 | 0 | 0  | 0 | 2 | 0 | 0 | 0 | 0 | 2.826 | 4.220 |
| 448 | FQNP559 | 300.33  | 106.57   | 0.776 | 0 | 0 | 0  | 0 | 1 | 1 | 0 | 0 | 0 | 2.186 | 3.978 |
| 449 | FQNP560 | 316.33  | 112.887  | 0.827 | 0 | 0 | 0  | 0 | 2 | 2 | 0 | 0 | 0 | 2.204 | 3.871 |
| 450 | FQNP561 | 240.27  | 127.648  | 0.85  | 0 | 0 | 0  | 0 | 1 | 0 | 0 | 2 | 0 | 2.349 | 3.955 |
| 451 | FQNP562 | 442.8   | 223.21   | 1.323 | 0 | 0 | 0  | 0 | 1 | 0 | 0 | 1 | 0 | 2.371 | 3.908 |
| 452 | FQNP563 | 442.8   | 232.849  | 1.033 | 0 | 0 | 0  | 0 | 1 | 0 | 0 | 3 | 0 | 2.194 | 3.826 |
| 453 | FQNP564 | 458.8   | 244.695  | 1.035 | 0 | 0 | 0  | 0 | 2 | 0 | 0 | 1 | 0 | 2.333 | 4.161 |
| 454 | FQNP565 | 498.82  | 282.541  | 0.984 | 0 | 0 | 0  | 0 | 1 | 0 | 0 | 3 | 0 | 2.668 | 3.887 |
| 455 | FQNP566 | 208.28  | 51.057   | 1.094 | 0 | 0 | 0  | 0 | 0 | 0 | 0 | 0 | 0 | 1.788 | 3.886 |
| 456 | FQNP567 | 418.48  | 183.245  | 1.236 | 0 | 0 | 2  | 0 | 2 | 2 | 0 | 0 | 0 | 3.955 | 4.443 |
| 457 | FQNP568 | 226.25  | 54.924   | 1.19  | 0 | 0 | 0  | 0 | 2 | 2 | 0 | 2 | 0 | 1.791 | 3.458 |
| 458 | FQNP569 | 182.19  | 43.659   | 1.3   | 0 | 0 | 0  | 0 | 1 | 0 | 0 | 2 | 0 | 2.495 | 3.714 |
| 459 | FQNP571 | 1369.82 | 1718.197 | 1.079 | 0 | 0 | 10 | 0 | 8 | 6 | 0 | 5 | 0 | 6.149 | 7.460 |



|     |         |         |          |       |   |   |    |   |    |    |   |    |   |        |        |
|-----|---------|---------|----------|-------|---|---|----|---|----|----|---|----|---|--------|--------|
| 460 | FQNP572 | 1383.85 | 1778.609 | 1.097 | 0 | 0 | 10 | 0 | 8  | 6  | 0 | 6  | 0 | 6.324  | 7.386  |
| 461 | FQNP573 | 2795.76 | 9251.423 | 1.099 | 0 | 0 | 20 | 0 | 16 | 8  | 0 | 10 | 0 | 22.254 | 15.481 |
| 462 | FQNP574 | 320.52  | 81.901   | 1.23  | 0 | 0 | 1  | 0 | 2  | 0  | 0 | 0  | 0 | 1.688  | 4.405  |
| 463 | FQNP576 | 304.52  | 76.911   | 0.912 | 0 | 0 | 1  | 0 | 1  | 0  | 0 | 0  | 0 | 1.641  | 4.425  |
| 464 | FQNP579 | 217.24  | 49.06    | 1.132 | 0 | 0 | 1  | 0 | 1  | 0  | 0 | 0  | 0 | 2.602  | 4.337  |
| 465 | FQNP580 | 264.35  | 69.14    | 0.6   | 0 | 0 | 0  | 0 | 2  | 0  | 0 | 2  | 0 | 2.85   | 4.158  |
| 466 | FQNP581 | 447.58  | 280.529  | 1.024 | 0 | 0 | 0  | 0 | 2  | 0  | 0 | 0  | 0 | 2.394  | 4.293  |
| 467 | FQNP582 | 645.69  | 673.098  | 0.995 | 0 | 0 | 5  | 0 | 14 | 12 | 0 | 0  | 0 | 6.025  | 5.223  |
| 468 | FQNP583 | 207.26  | 46.543   | 0.701 | 0 | 0 | 0  | 0 | 5  | 2  | 0 | 0  | 0 | 1.666  | 4.219  |
| 469 | FQNP584 | 344.54  | 114.451  | 1.364 | 0 | 0 | 0  | 0 | 0  | 0  | 0 | 5  | 0 | 1.685  | 3.275  |
| 470 | FQNP585 | 330.56  | 134.288  | 1.613 | 0 | 0 | 0  | 0 | 0  | 0  | 0 | 3  | 0 | 1.687  | 3.388  |
| 471 | FQNP586 | 330.56  | 134.288  | 1.613 | 0 | 0 | 0  | 0 | 0  | 0  | 0 | 3  | 0 | 1.687  | 3.388  |
| 472 | FQNP587 | 274.29  | 102.014  | 0.447 | 0 | 0 | 2  | 0 | 0  | 0  | 0 | 1  | 0 | 1.152  | 4.745  |
| 473 | FQNP590 | 306.54  | 109.544  | 0.502 | 0 | 0 | 0  | 0 | 1  | 0  | 0 | 2  | 0 | 3.642  | 4.129  |
| 474 | FQNP591 | 320.57  | 117.416  | 0.502 | 0 | 0 | 0  | 0 | 0  | 0  | 0 | 2  | 0 | 4.025  | 4.028  |
| 475 | FQNP592 | 324.56  | 115.464  | 1.054 | 0 | 0 | 0  | 0 | 2  | 0  | 0 | 2  | 0 | 3.524  | 4.003  |
| 476 | FQNP593 | 216.25  | 69.552   | 1.026 | 0 | 0 | 0  | 0 | 1  | 1  | 0 | 3  | 0 | 1.738  | 3.521  |
| 477 | FQNP594 | 544.64  | 455.734  | 1.102 | 0 | 0 | 2  | 0 | 2  | 2  | 0 | 2  | 0 | 2.977  | 4.423  |
| 478 | FQNP595 | 570.63  | 485.217  | 1.065 | 0 | 0 | 2  | 0 | 2  | 1  | 0 | 0  | 0 | 3.108  | 4.873  |
| 479 | FQNP596 | 544.64  | 460.628  | 1.061 | 0 | 0 | 2  | 0 | 3  | 2  | 0 | 2  | 0 | 3.187  | 4.563  |
| 480 | FQNP597 | 526.62  | 443.139  | 1.116 | 0 | 0 | 2  | 0 | 2  | 1  | 0 | 0  | 0 | 3.087  | 4.826  |
| 481 | FQNP598 | 540.6   | 455.132  | 1.051 | 0 | 0 | 2  | 0 | 2  | 1  | 0 | 0  | 0 | 3.101  | 4.862  |
| 482 | FQNP599 | 194.24  | 71.54    | 1.875 | 0 | 0 | 0  | 0 | 0  | 0  | 0 | 2  | 0 | 1.495  | 3.338  |
| 483 | FQNP600 | 318.34  | 203.129  | 0.493 | 0 | 0 | 0  | 0 | 1  | 1  | 0 | 2  | 0 | 1.968  | 3.941  |
| 484 | FQNP601 | 334.34  | 213.855  | 0.677 | 0 | 0 | 0  | 0 | 2  | 2  | 0 | 2  | 0 | 1.982  | 3.779  |
| 485 | FQNP602 | 392.68  | 158.183  | 0.784 | 0 | 0 | 0  | 0 | 0  | 0  | 0 | 2  | 0 | 3.831  | 3.923  |
| 486 | FQNP603 | 348.53  | 147.179  | 1.224 | 0 | 0 | 0  | 0 | 3  | 1  | 0 | 0  | 0 | 2.7    | 4.048  |
| 487 | FQNP604 | 330.51  | 141.617  | 1.314 | 0 | 0 | 0  | 0 | 2  | 0  | 0 | 0  | 0 | 2.733  | 4.095  |
| 488 | FQNP605 | 330.51  | 139.883  | 1.209 | 0 | 0 | 0  | 0 | 2  | 0  | 0 | 0  | 0 | 2.708  | 4.139  |

|     |         |        |         |       |   |   |   |   |   |   |   |   |   |       |       |
|-----|---------|--------|---------|-------|---|---|---|---|---|---|---|---|---|-------|-------|
| 489 | FQNP607 | 330.51 | 139.883 | 1.209 | 0 | 0 | 0 | 0 | 2 | 0 | 0 | 0 | 0 | 2.708 | 4.139 |
| 490 | FQNP608 | 330.51 | 129.87  | 1.209 | 0 | 0 | 1 | 0 | 1 | 0 | 0 | 0 | 0 | 2.707 | 4.352 |
| 491 | FQNP609 | 416.56 | 193.082 | 1.11  | 1 | 0 | 0 | 0 | 2 | 1 | 0 | 3 | 0 | 2.964 | 4.229 |
| 492 | FQNP610 | 348.53 | 147.179 | 1.224 | 0 | 0 | 0 | 0 | 3 | 1 | 0 | 0 | 0 | 2.7   | 4.048 |
| 493 | FQNP612 | 380.52 | 161.315 | 1.284 | 0 | 0 | 0 | 0 | 0 | 0 | 0 | 0 | 0 | 2.461 | 3.883 |
| 494 | FQNP613 | 412.77 | 167.372 | 0.769 | 0 | 0 | 0 | 0 | 1 | 0 | 0 | 0 | 0 | 4.08  | 4.267 |
| 495 | FQNP614 | 180.18 | 37.6    | 0     | 0 | 0 | 0 | 0 | 6 | 5 | 0 | 0 | 0 | 0.873 | 4.006 |
| 496 | FQNP615 | 252.44 | 34.261  | 1.594 | 0 | 0 | 0 | 0 | 2 | 0 | 0 | 0 | 0 | 1.213 | 3.873 |
| 497 | FQNP616 | 304.46 | 186.229 | 0.885 | 0 | 0 | 0 | 0 | 0 | 0 | 0 | 0 | 0 | 3.652 | 4.102 |
| 498 | FQNP617 | 218.37 | 68.176  | 1.6   | 0 | 0 | 0 | 0 | 1 | 0 | 0 | 0 | 0 | 1.545 | 3.783 |
| 499 | FQNP618 | 316.33 | 180.798 | 0.827 | 0 | 0 | 0 | 0 | 2 | 2 | 0 | 2 | 0 | 2.918 | 3.717 |
| 500 | FQNP620 | 456.48 | 197.256 | 1.258 | 0 | 0 | 0 | 0 | 0 | 0 | 0 | 4 | 0 | 2.603 | 3.497 |
| 501 | FQNP621 | 382.39 | 132.831 | 1.259 | 0 | 0 | 0 | 0 | 0 | 0 | 0 | 1 | 0 | 2.382 | 3.770 |
| 502 | FQNP622 | 348.44 | 163.557 | 0.904 | 0 | 0 | 2 | 0 | 6 | 2 | 0 | 0 | 0 | 3.322 | 5.021 |
| 503 | FQNP623 | 332.44 | 155.904 | 0.935 | 0 | 0 | 2 | 0 | 5 | 1 | 0 | 0 | 0 | 3.309 | 5.091 |
| 504 | FQNP624 | 186.28 | 42.114  | 1.3   | 0 | 0 | 0 | 0 | 3 | 1 | 0 | 0 | 0 | 1.566 | 3.926 |
| 505 | FQNP625 | 186.28 | 42.114  | 1.3   | 0 | 0 | 0 | 0 | 3 | 1 | 0 | 0 | 0 | 1.566 | 3.926 |
| 506 | FQNP626 | 300.28 | 168.586 | 0.942 | 0 | 0 | 0 | 0 | 3 | 0 | 0 | 0 | 0 | 2.82  | 4.390 |
| 507 | FQNP627 | 290.27 | 148.117 | 0.683 | 1 | 0 | 0 | 0 | 3 | 0 | 0 | 0 | 1 | 3.723 | 4.857 |
| 508 | FQNP628 | 420.49 | 331.777 | 1.409 | 0 | 0 | 0 | 0 | 2 | 1 | 0 | 1 | 0 | 3.432 | 3.870 |
| 509 | FQNP629 | 420.49 | 326.113 | 1.442 | 0 | 0 | 0 | 0 | 2 | 1 | 0 | 1 | 0 | 3.367 | 3.851 |
| 510 | FQNP630 | 406.51 | 265.803 | 1.182 | 0 | 0 | 0 | 0 | 2 | 1 | 0 | 2 | 0 | 2.604 | 3.806 |
| 511 | FQNP631 | 422.51 | 295.134 | 1.319 | 0 | 0 | 0 | 0 | 3 | 1 | 0 | 1 | 0 | 3.672 | 4.010 |
| 512 | FQNP632 | 422.51 | 275.107 | 1.196 | 0 | 0 | 0 | 0 | 3 | 2 | 0 | 0 | 0 | 2.537 | 3.926 |
| 513 | FQNP636 | 472.78 | 203.683 | 1.109 | 0 | 0 | 0 | 0 | 3 | 0 | 0 | 0 | 0 | 2.381 | 4.326 |
| 514 | FQNP637 | 486.76 | 212.614 | 1.133 | 0 | 0 | 0 | 0 | 3 | 0 | 0 | 0 | 0 | 2.467 | 4.323 |
| 515 | FQNP638 | 512.85 | 257.276 | 1.07  | 0 | 0 | 2 | 0 | 1 | 0 | 0 | 0 | 0 | 2.622 | 4.817 |
| 516 | FQNP639 | 428.5  | 195.18  | 0.712 | 0 | 1 | 0 | 0 | 2 | 0 | 0 | 2 | 0 | 2.342 | 5.417 |
| 517 | FQNP640 | 547.62 | 417.868 | 1.231 | 0 | 0 | 0 | 0 | 1 | 0 | 0 | 0 | 0 | 5.489 | 4.243 |

|     |         |        |         |       |   |   |   |   |   |   |   |   |   |        |       |
|-----|---------|--------|---------|-------|---|---|---|---|---|---|---|---|---|--------|-------|
| 518 | FQNP641 | 293.29 | 80.316  | 1.304 | 0 | 0 | 0 | 0 | 1 | 0 | 0 | 0 | 0 | 1.492  | 3.918 |
| 519 | FQNP642 | 339.37 | 116.861 | 1.016 | 0 | 0 | 0 | 0 | 1 | 0 | 0 | 0 | 0 | 1.446  | 4.064 |
| 520 | FQNP643 | 256.43 | 0       | 1.545 | 0 | 0 | 0 | 0 | 3 | 0 | 0 | 0 | 0 | 1.48   | 3.996 |
| 521 | FQNP644 | 442.85 | 178.252 | 0.744 | 0 | 0 | 0 | 0 | 1 | 0 | 0 | 0 | 0 | 4.082  | 4.284 |
| 522 | FQNP645 | 426.8  | 221.611 | 0.674 | 0 | 0 | 0 | 0 | 1 | 0 | 0 | 0 | 0 | 2.212  | 4.293 |
| 523 | FQNP646 | 456.78 | 245.124 | 1.235 | 0 | 0 | 0 | 0 | 2 | 0 | 0 | 0 | 0 | 2.301  | 4.178 |
| 524 | FQNP647 | 456.78 | 243.519 | 1.086 | 0 | 0 | 0 | 0 | 2 | 0 | 0 | 0 | 0 | 2.275  | 4.242 |
| 525 | FQNP648 | 442.81 | 0       | 0.662 | 0 | 0 | 0 | 0 | 2 | 1 | 0 | 2 | 0 | 12.188 | 4.120 |
| 526 | FQNP651 | 194.21 | 41.79   | 1.857 | 0 | 0 | 1 | 0 | 5 | 5 | 0 | 0 | 0 | 1.173  | 3.421 |
| 527 | FQNP652 | 434.43 | 362.775 | 0.791 | 0 | 0 | 1 | 0 | 6 | 3 | 0 | 2 | 0 | 4.198  | 4.458 |
| 528 | FQNP653 | 342.34 | 80.959  | 0.958 | 0 | 0 | 3 | 0 | 8 | 6 | 0 | 0 | 0 | 3.136  | 4.694 |

**Table S7.** List of 60-derivatives, their calculated molecular descriptors, and predicted pMIC values

| MolID | MW     | D/Dr06  | GATS6m | nArCOOH | nRCONH2 | nROR | nHDon | nHBonds | H051 | TI2   | pMIC  |
|-------|--------|---------|--------|---------|---------|------|-------|---------|------|-------|-------|
| 60    | 334.46 | 90.65   | 0.904  | 0       | 0       | 2    | 4     | 3       | 2    | 4.886 | 4.374 |
| 60a   | 333.48 | 90.65   | 0.922  | 0       | 1       | 2    | 5     | 3       | 2    | 4.886 | 5.730 |
| 60b   | 454.57 | 266.815 | 0.842  | 1       | 0       | 2    | 4     | 3       | 2    | 7.848 | 5.105 |
| 60c   | 334.51 | 90.71   | 0.893  | 0       | 0       | 3    | 3     | 3       | 0    | 4.958 | 4.810 |
| 60d   | 376.55 | 103.221 | 0.867  | 0       | 0       | 5    | 1     | 0       | 2    | 4.848 | 5.664 |
| 60e   | 390.58 | 108.402 | 0.862  | 0       | 0       | 5    | 0     | 0       | 2    | 5.284 | 5.565 |

## References

1. Gonzalez, M.; Zamilpa, A.; Marquina, S.; Navarro, V.; Alvarez, L., Antimycotic spirostanol saponins from *Solanum hispidum* leaves and their structure-activity relationships. *J Nat Prod* **2004**, *67* (6), 938-41.
2. Pettit, G. R.; Schaufelberger, D. E.; Nieman, R. A.; Dufresne, C.; Saenz-Renauld, J. A., Antineoplastic agents, 177. Isolation and structure of phyllanthostatin 6. *J Nat Prod* **1990**, *53* (6), 1406-13.
3. Wang, T. M.; Hojo, T.; Ran, F. X.; Wang, R. F.; Wang, R. Q.; Chen, H. B.; Cui, J. R.; Shang, M. Y.; Cai, S. Q., Cardenolides from *Saussurea stella* with cytotoxicity toward cancer cells. *J Nat Prod* **2007**, *70* (9), 1429-33.
4. Tezuka, Y.; Honda, K.; Banskota, A. H.; Thet, M. M.; Kadota, S., Kinmoonosides A-C, three new cytotoxic saponins from the fruits of *Acacia concinna*, a medicinal plant collected in myanmar. *J Nat Prod* **2000**, *63* (12), 1658-64.
5. Susplugas, S.; Hung, N. V.; Bignon, J.; Thoison, O.; Kruczynski, A.; Sevenet, T.; Gueritte, F., Cytotoxic aryl-naphthalene lignans from a Vietnamese acanthaceae, *Justicia patentiflora*. *J Nat Prod* **2005**, *68* (5), 734-8.
6. Zhang, H. J.; Rumschlag-Booms, E.; Guan, Y. F.; Wang, D. Y.; Liu, K. L.; Li, W. F.; Nguyen, V. H.; Cuong, N. M.; Soejarto, D. D.; Fong, H. H. S.; Rong, L., Potent Inhibitor of Drug-Resistant HIV-1 Strains Identified from the Medicinal Plant *Justicia gendarussa*. *J Nat Prod* **2017**, *80* (6), 1798-1807.
7. Gelmi, M. L.; Fontana, G.; Pocar, D.; Pontremoli, G.; Pellegrino, S.; Bombardelli, E.; Riva, A.; Balduini, W.; Carloni, S.; Cimino, M., Novel 3-O-glycosyl-3-demethylthiocolchicines as ligands for glycine and gamma-aminobutyric acid receptors. *J Med Chem* **2007**, *50* (9), 2245-8.
8. Singh, A.; Kumar, N.; Singh, S.; Sewariya, S.; Sharma, M. K.; Chandra, R., High-valued pyrazinoindole analogues: Synthesis, antibacterial activity, structure activity relationship and molecular dynamics analyses. *Results in Chemistry* **2021**, *3*, 100194.
9. Wang, J.; Zhang, P. L.; Ansari, M. F.; Li, S.; Zhou, C. H., Molecular design and preparation of 2-aminothiazole sulfanilamide oximes as membrane active antibacterial agents for drug resistant *Acinetobacter baumannii*. *Bioorg Chem* **2021**, *113*, 105039.
10. Vereshchagin, A. N.; Frolov, N. A.; Konyuhova, V. Y.; Kapelistaya, E. A.; Hansford, K. A.; Egorov, M. P., Investigations into the structure-activity relationship in gemini QACs based on biphenyl and oxydiphenyl linker. *RSC Adv* **2021**, *11* (6), 3429-3438.
11. Zhou, M.; Eun, Y. J.; Guzei, I. A.; Weibel, D. B., Structure-activity studies of divi: an inhibitor of bacterial cell division. *ACS Med Chem Lett* **2013**, *4* (9), 880-885.
12. Matsingos, C.; Al-Adhami, T.; Jamshidi, S.; Hind, C.; Clifford, M.; Mark Sutton, J.; Rahman, K. M., Synthesis, microbiological evaluation and structure activity relationship analysis of linezolid analogues with different C5-acylamino substituents. *Bioorg Med Chem* **2021**, *49*, 116397.
13. Lyons, A.; Kirkham, J.; Blades, K.; Orr, D.; Dauncey, E.; Smith, O.; Dick, E.; Walker, R.; Matthews, T.; Bunt, A.; Finlayson, J.; Morrison, I.; Savage, V. J.; Moyo, E.; Butler, H. S.; Newman, R.; Ooi, N.; Smith, A.; Charrier, C.; Ratcliffe, A. J.; Stokes, N. R.; Best, S.; Salisbury, A. M.; Craighead, M.; Cooper, I. R., Discovery and structure-activity relationships of a novel oxazolidinone class of bacterial type II topoisomerase inhibitors. *Bioorg Med Chem Lett* **2022**, *65*, 128648.
14. Pilon-Jimenez, B. A.; Saldivar-Gonzalez, F. I.; Diaz-Eufracio, B. I.; Medina-Franco, J. L., BIOFACQUIM: A Mexican Compound Database of Natural Products. *Biomolecules* **2019**, *9* (1), 31.
